# Supplementary material for: Design, synthesis, molecular docking and anti-proliferative activity of novel phenothiazine containing imidazo[1,2-a]pyridine derivatives against MARK4 protein
Source: Royal Society of Chemistry journal article supplement (doi:10.1039/d4md00059e), 2024-01-01
Supplement: d4md00059e1.pdf [file d4md00059e1.pdf]

## Supplementary Material

### Design, Synthesis, Molecular docking and Anti-proliferative activity of novel phenothiazine containing imidazo[1,2-a]pyridine derivatives against MARK4 Protein

Avijit Bhakta<sup>1,§</sup>, Sayeed Mukhtar<sup>2,§</sup>, Saleha Anwar<sup>4,§</sup>, Shaista Haider<sup>5</sup>, Mohammed Issa Alahmdi<sup>2</sup>, Humaira Parveen<sup>2</sup>, Meshari A Alsharif<sup>3</sup>, Mohmmad Younus Wani<sup>6</sup>, Anindita Chakrabarty<sup>5</sup>, Md. Imtaiyaz Hassan<sup>4</sup>, Naseem Ahmed<sup>1\*</sup>

<sup>1</sup>Department of Chemistry, Indian Institute of Technology Roorkee, Roorkee-247 667 (U.K.) India

<sup>2</sup>Department of Chemistry, Faculty of Science, University of Tabuk, Tabuk 71491, Saudi Arabia

<sup>3</sup>Chemistry Department, Faculty of Science, Umm Al-Qura University, Makkah, Saudi Arabia

<sup>4</sup>Centre for Interdisciplinary Research in Basic Sciences, Jamia Millia Islamia, New Delhi, India.

<sup>5</sup>Department of Life Sciences, Shiv Nadar University, Uttar Pradesh 201314, India.

<sup>6</sup>Department of Chemistry, College of Science, University of Jeddah, 21589 Jeddah, Saudi Arabia

\*Corresponding authors: e-mail: [naseem.ahmed@cy.iitr.ac.in](mailto:naseem.ahmed@cy.iitr.ac.in)

§*Sharing First Co-author:* Authors equally contributed to this work

#### Table of Contents

|                                               |     |
|-----------------------------------------------|-----|
| I. NMR SPECTRUM OF FINAL PRODUCTS .....       | S2  |
| II. FT-IR SPECTRUM OF FINAL PRODUCTS .....    | S27 |
| III. HRMS-ESI SPECTRA OF FINAL PRODUCTS ..... | S35 |
| IV. SINGLE CRYSTAL-XRD DATA .....             | S38 |

# Spectra

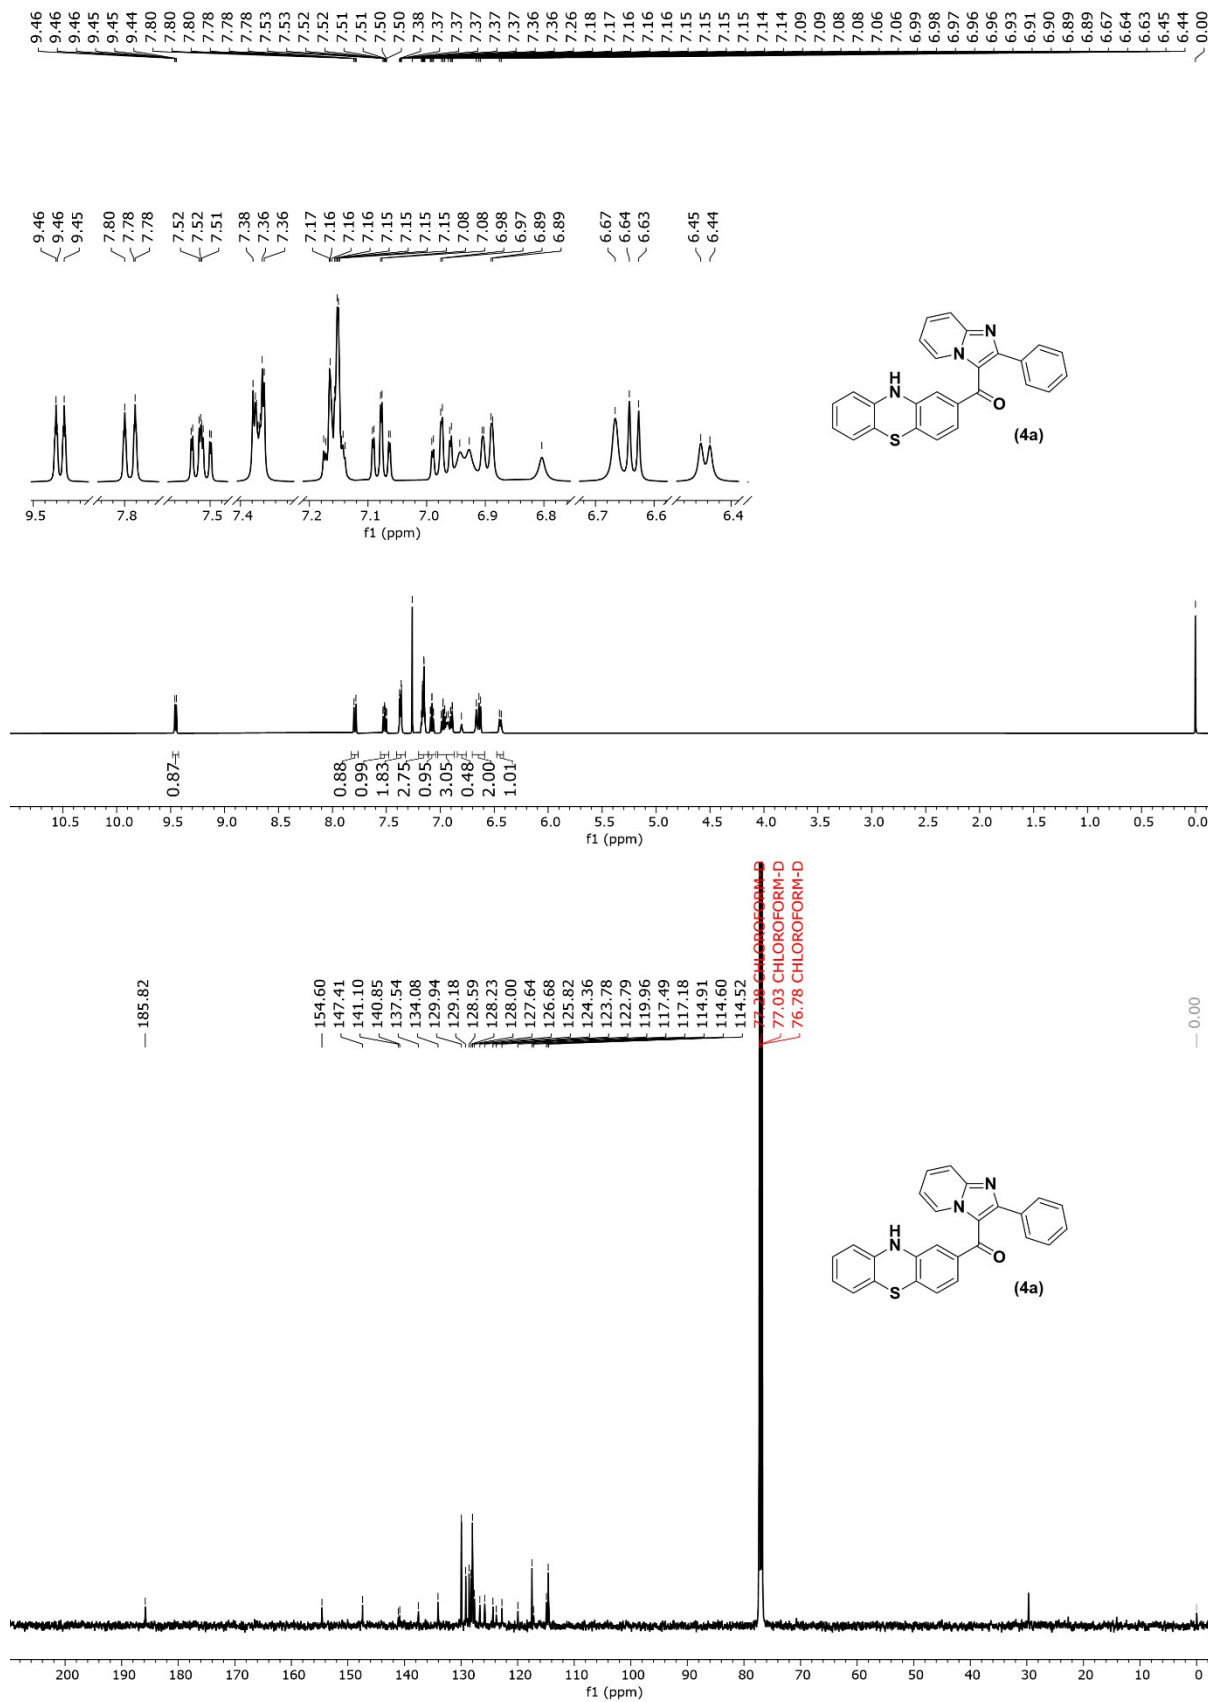

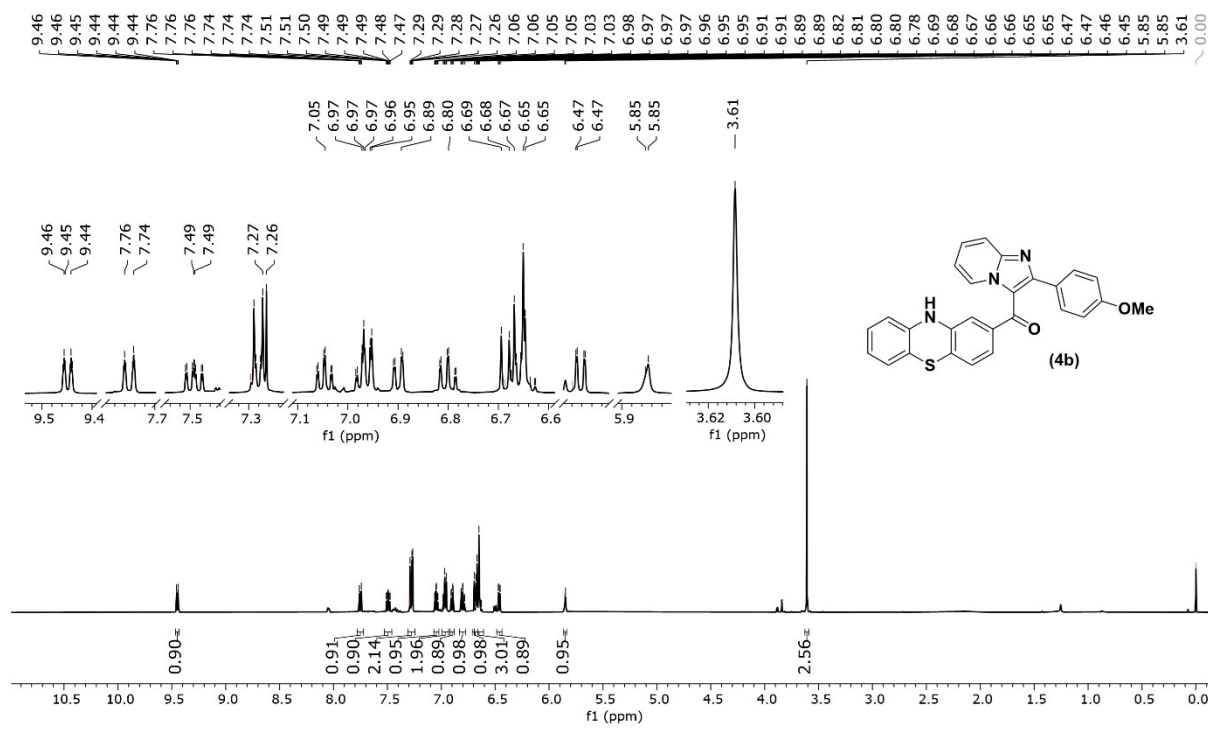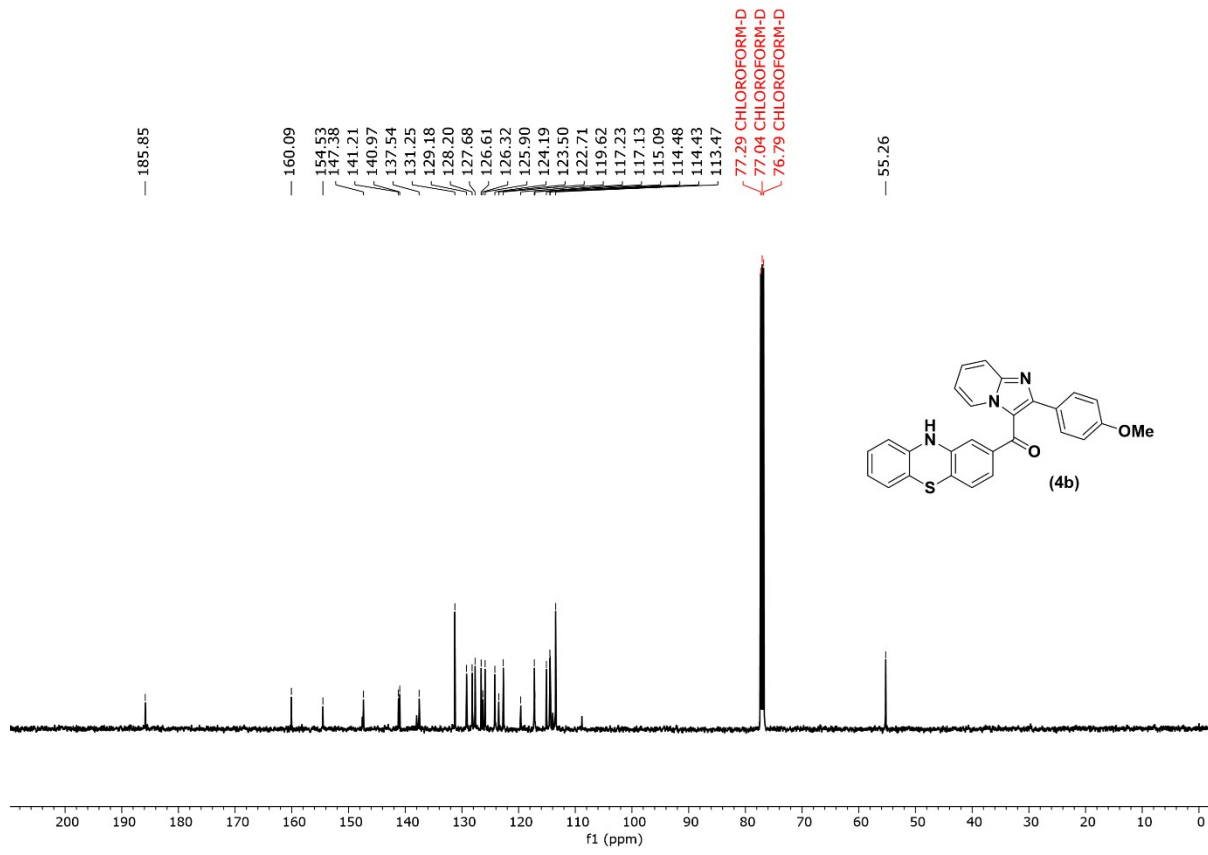

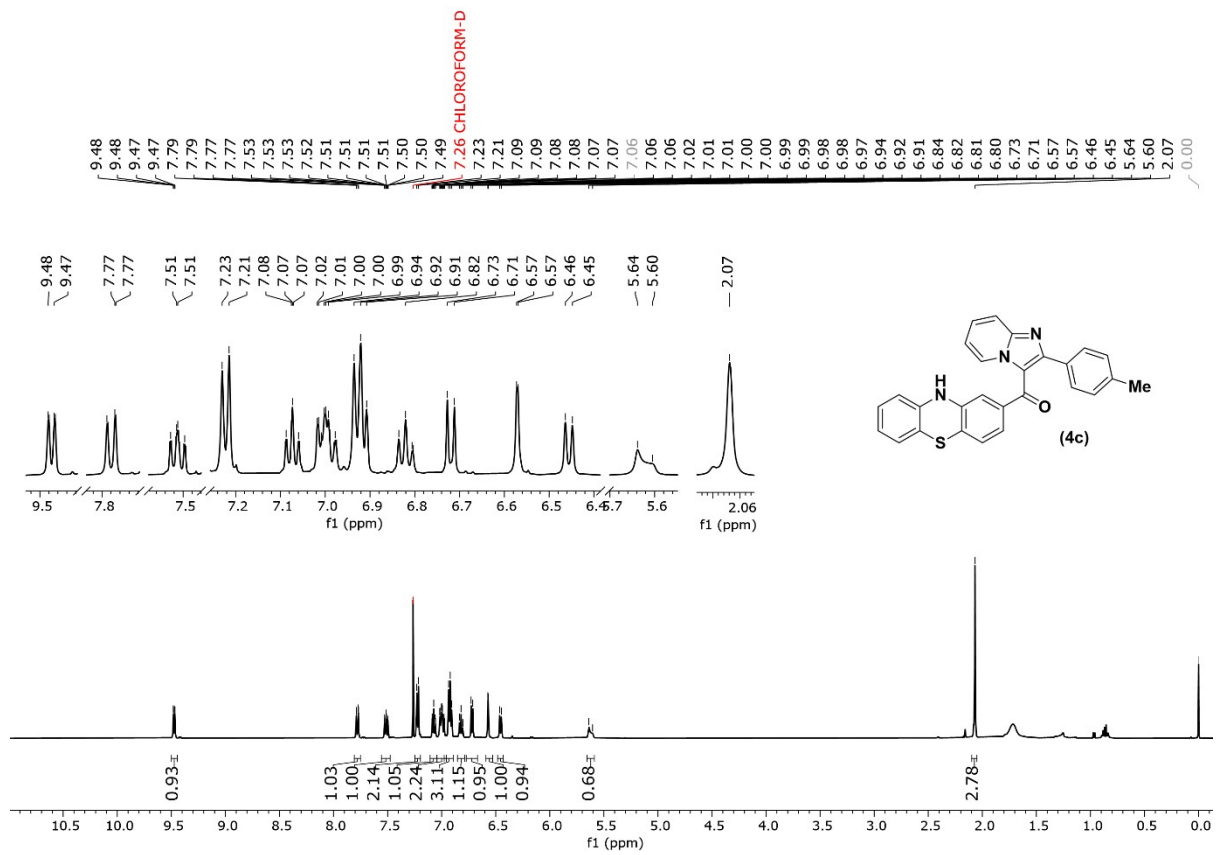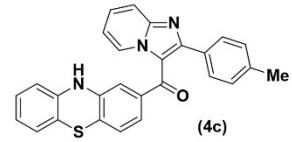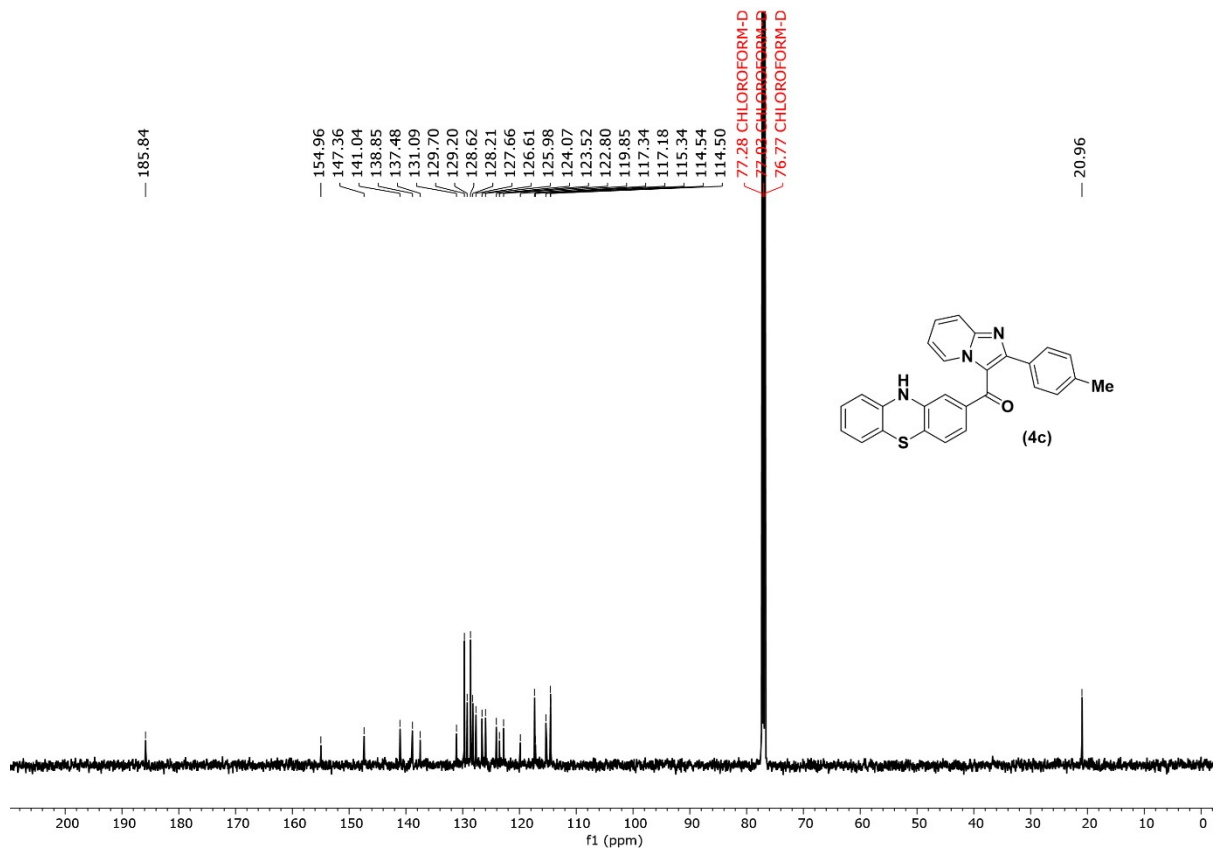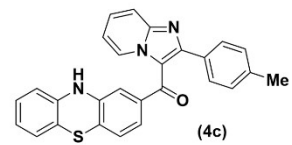



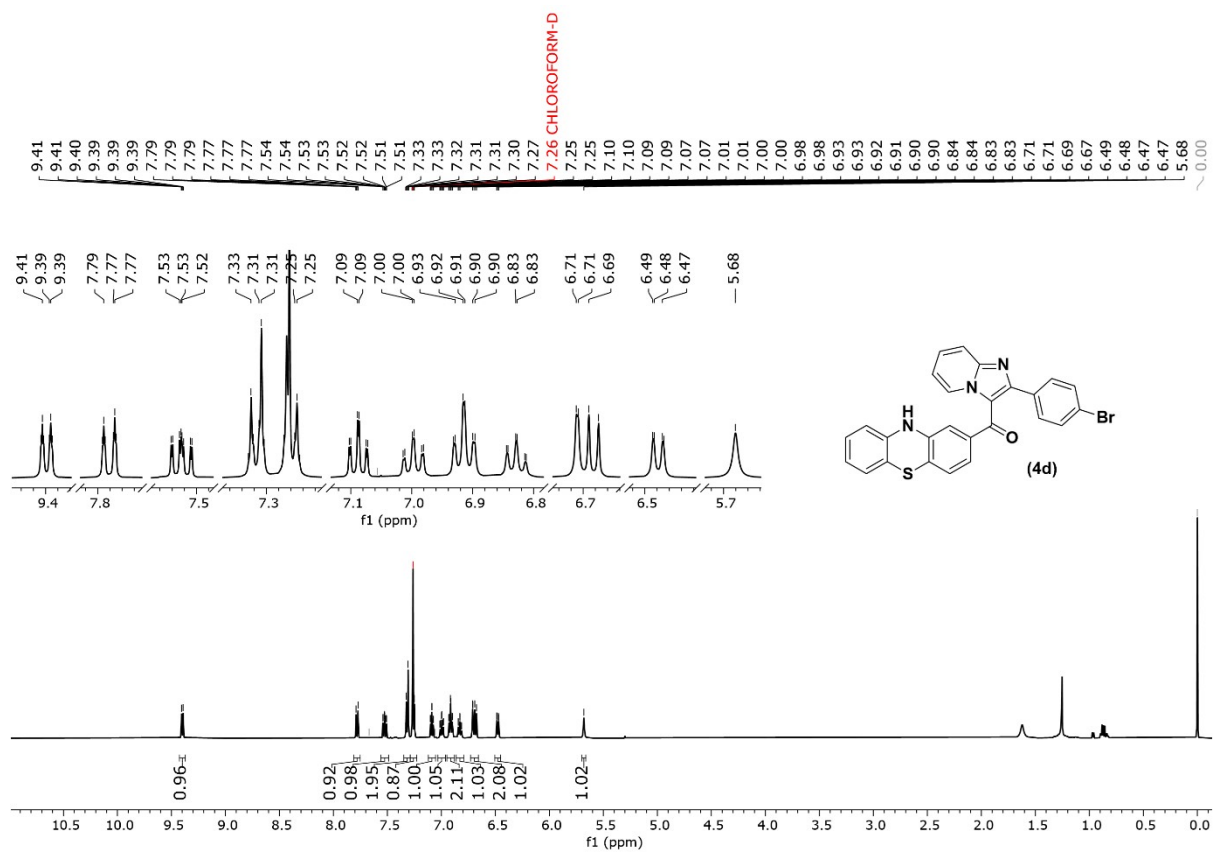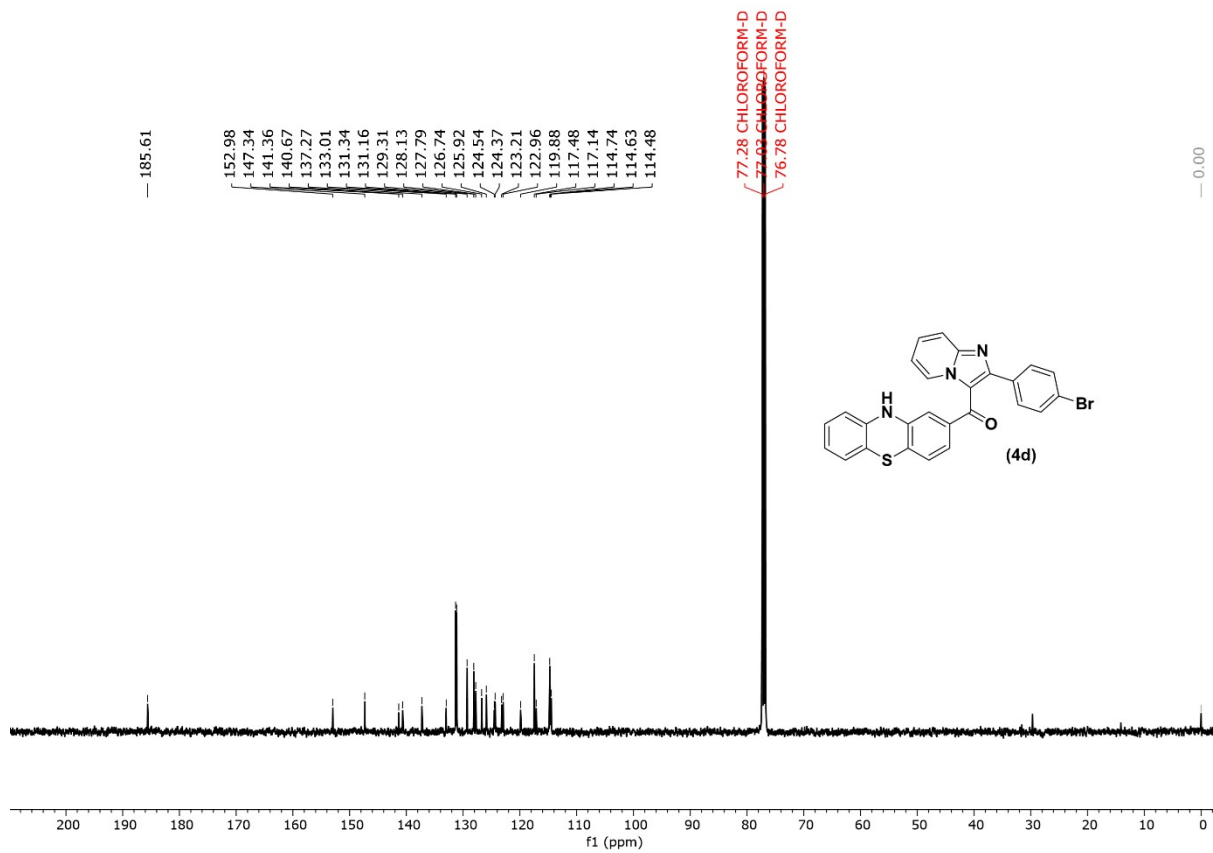

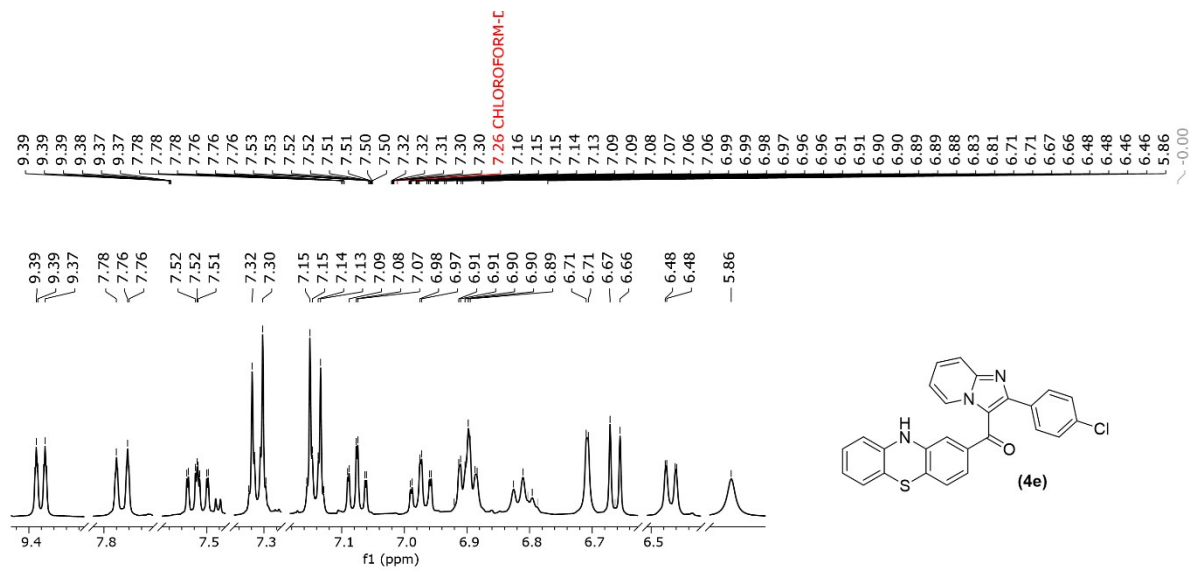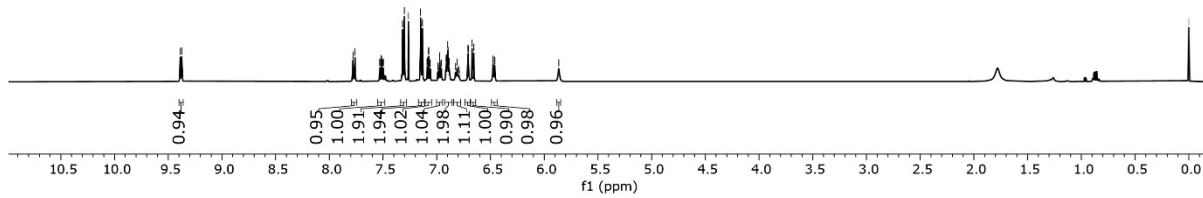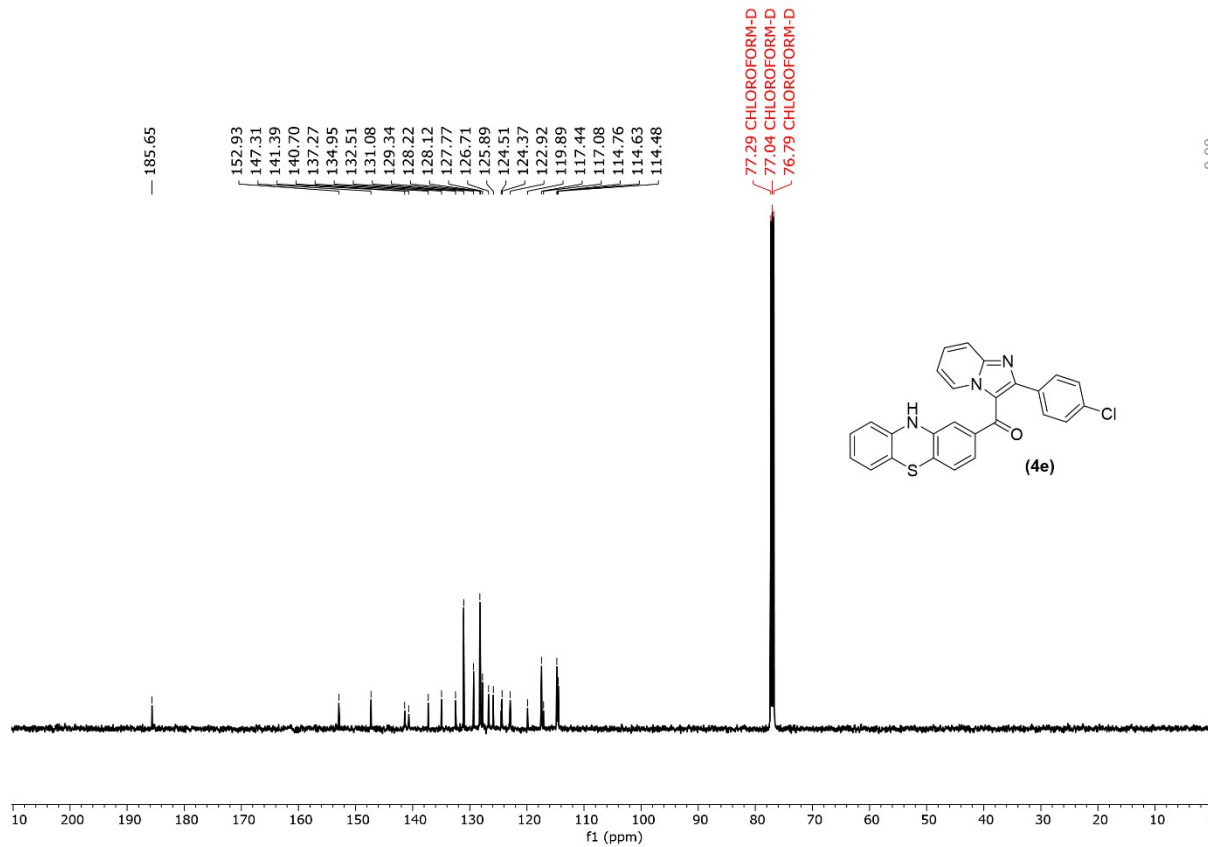

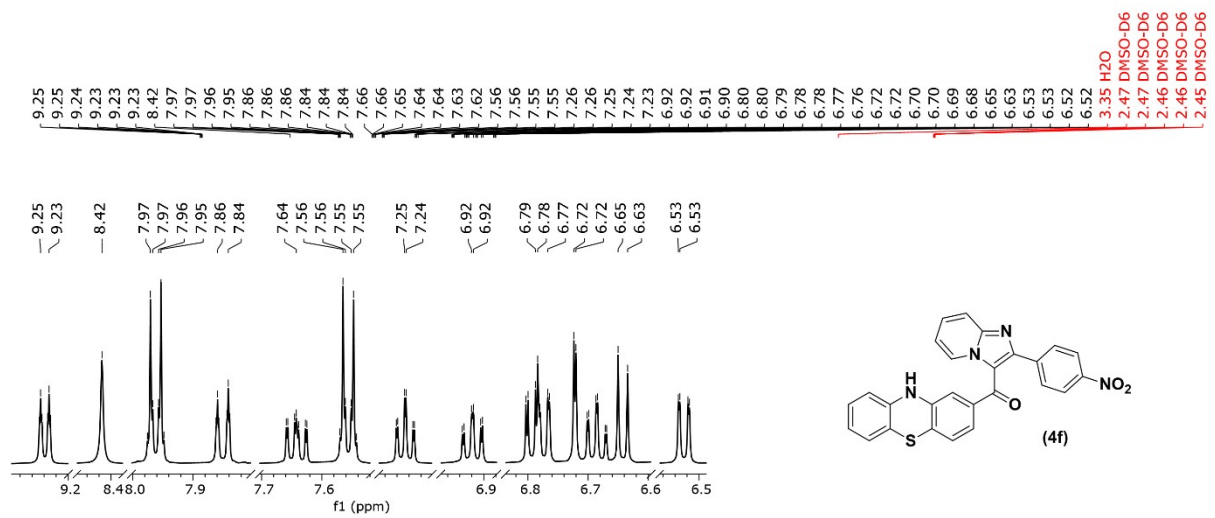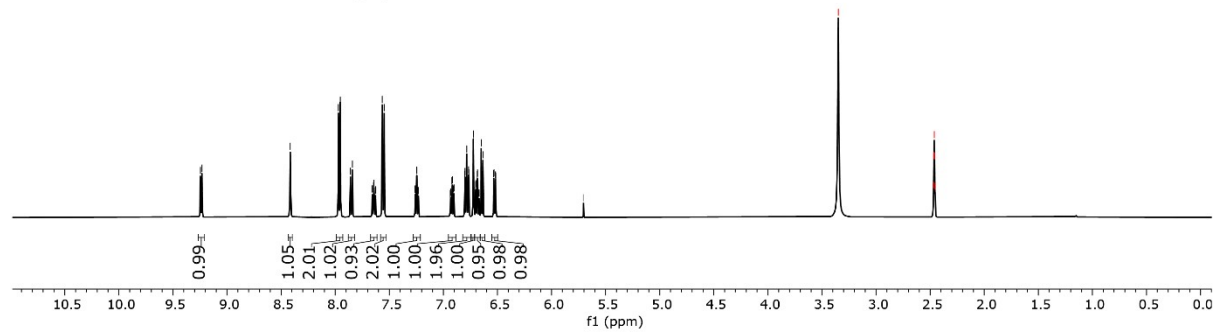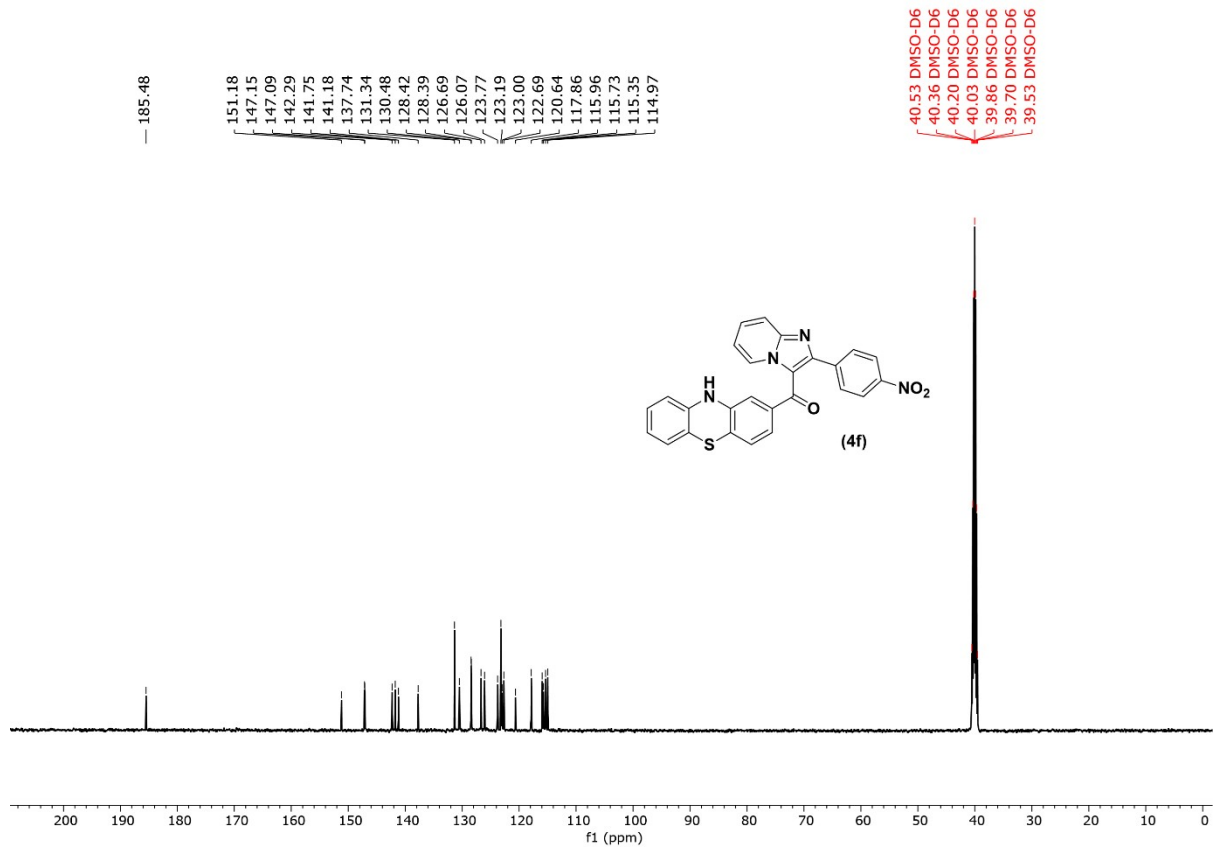

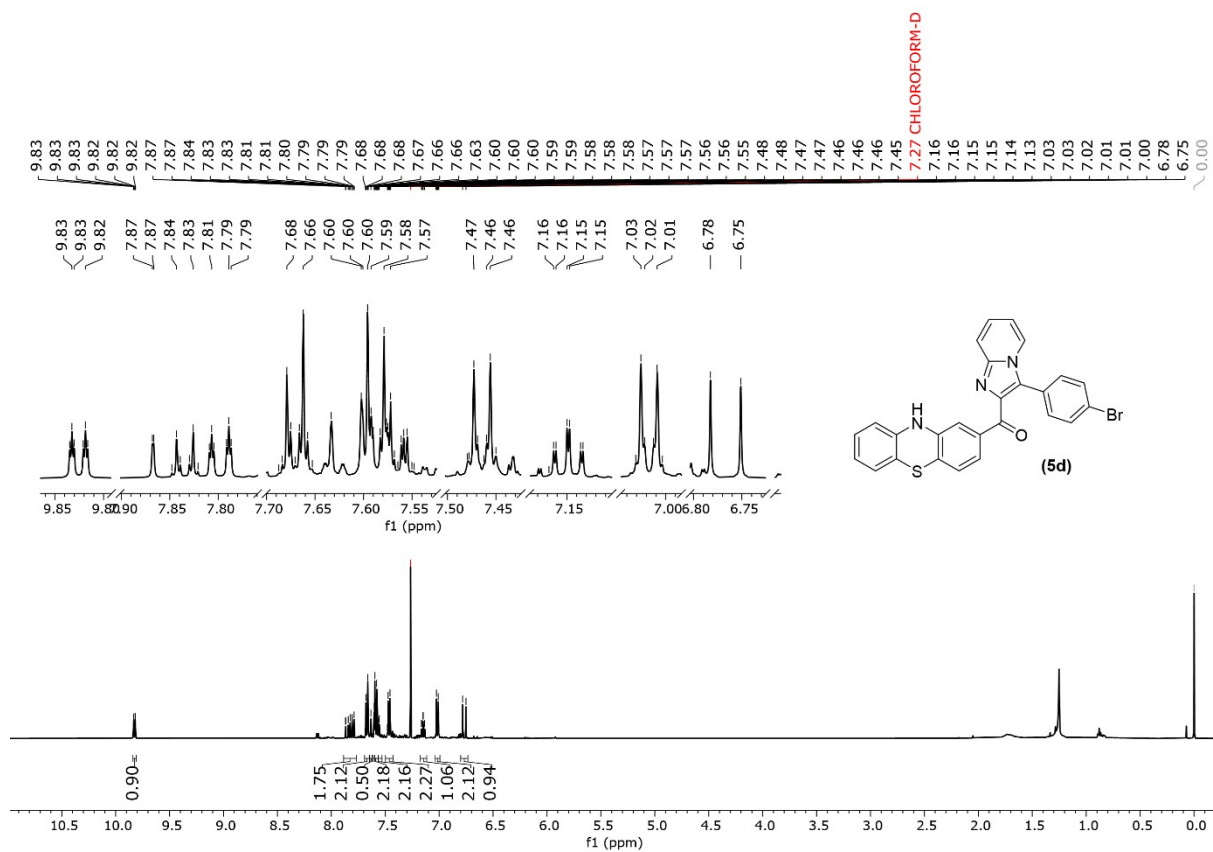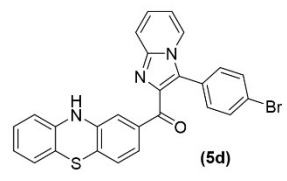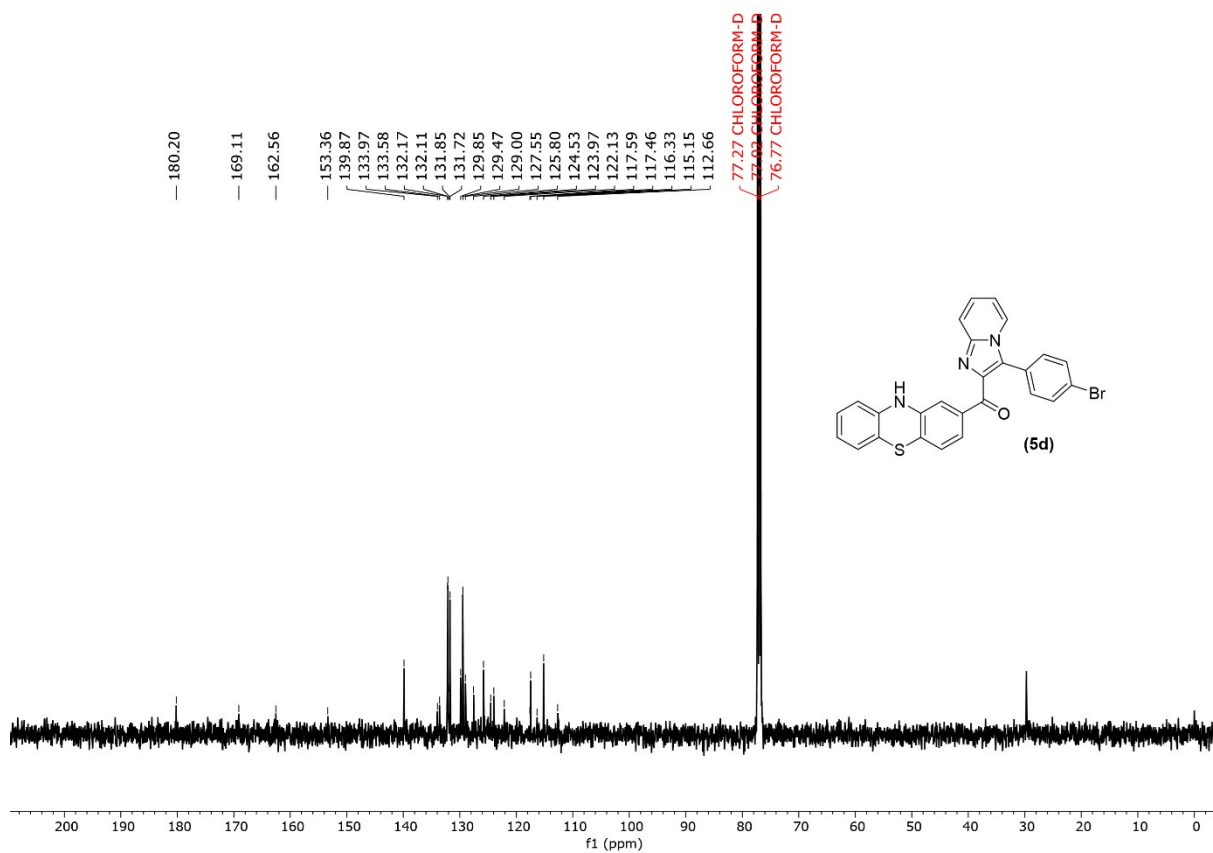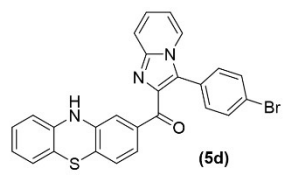

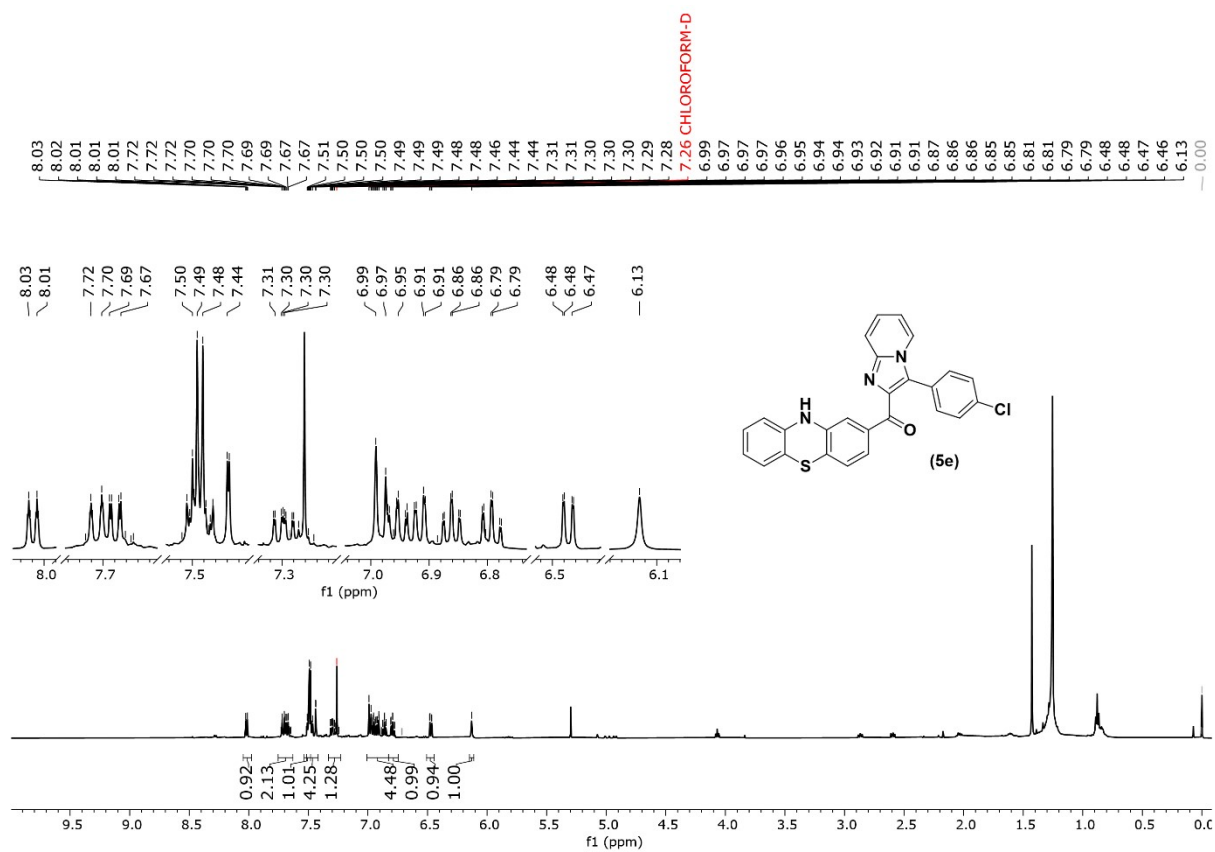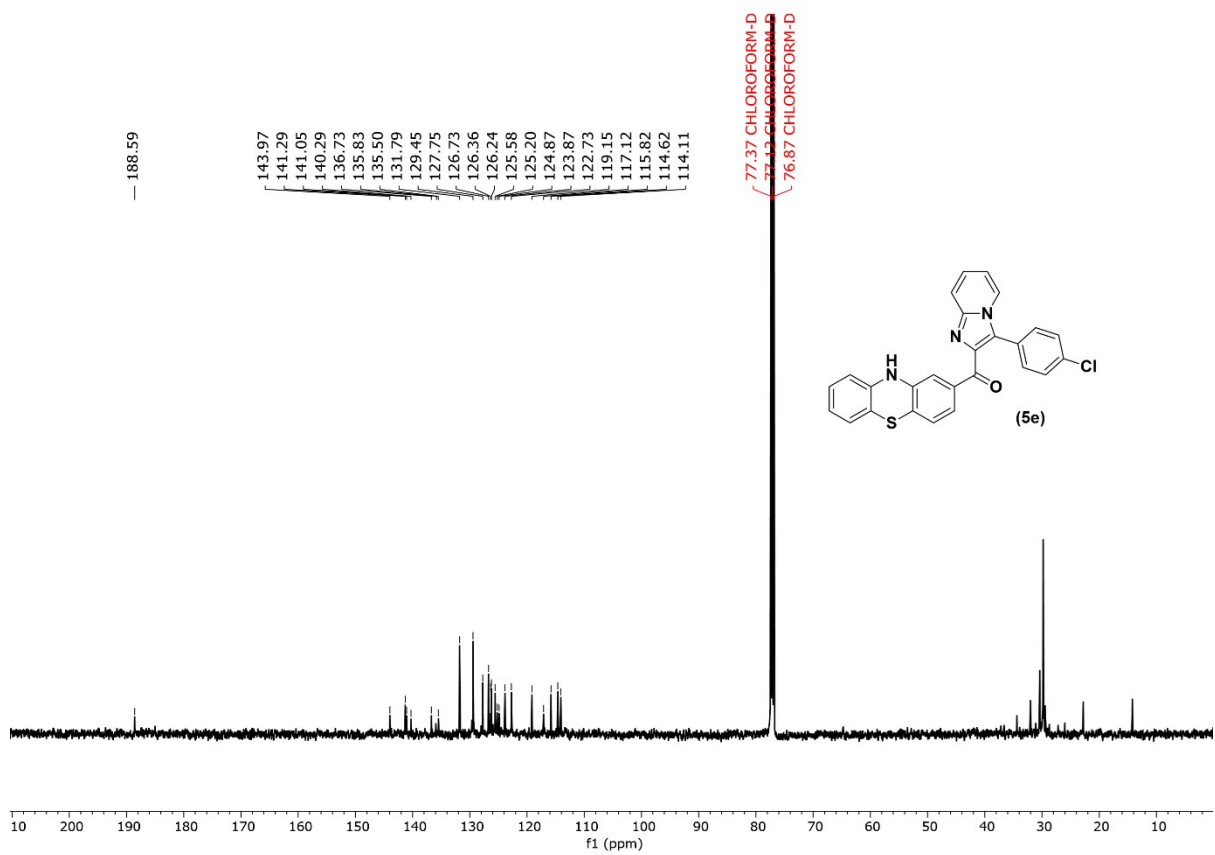

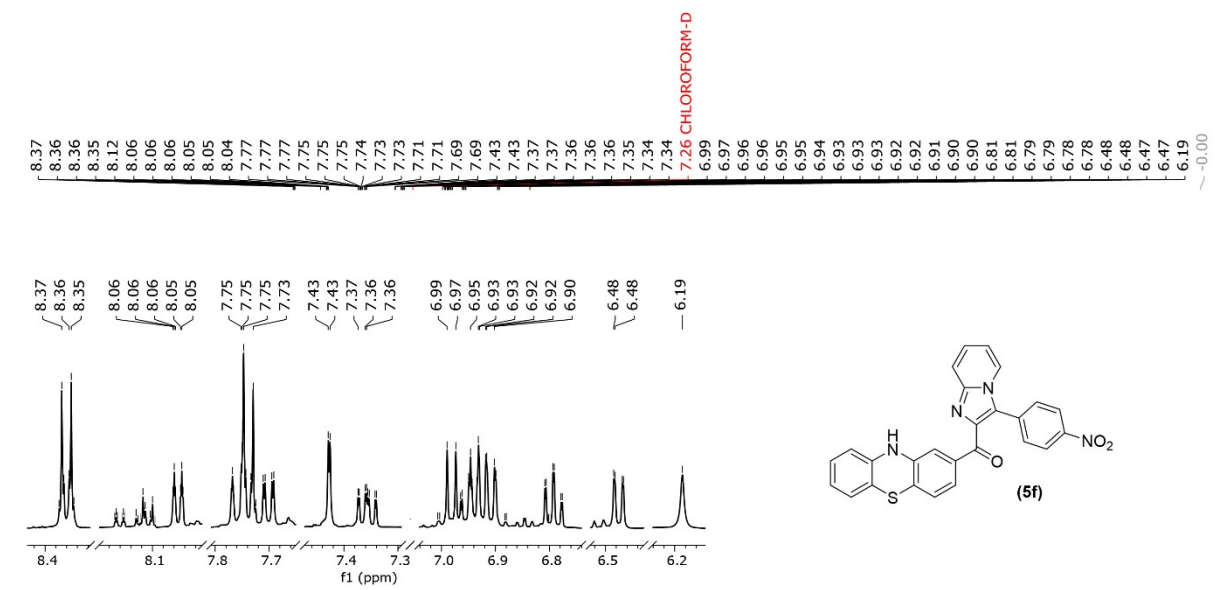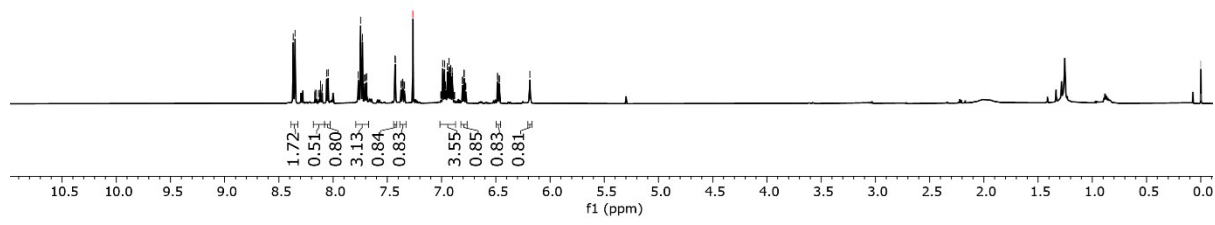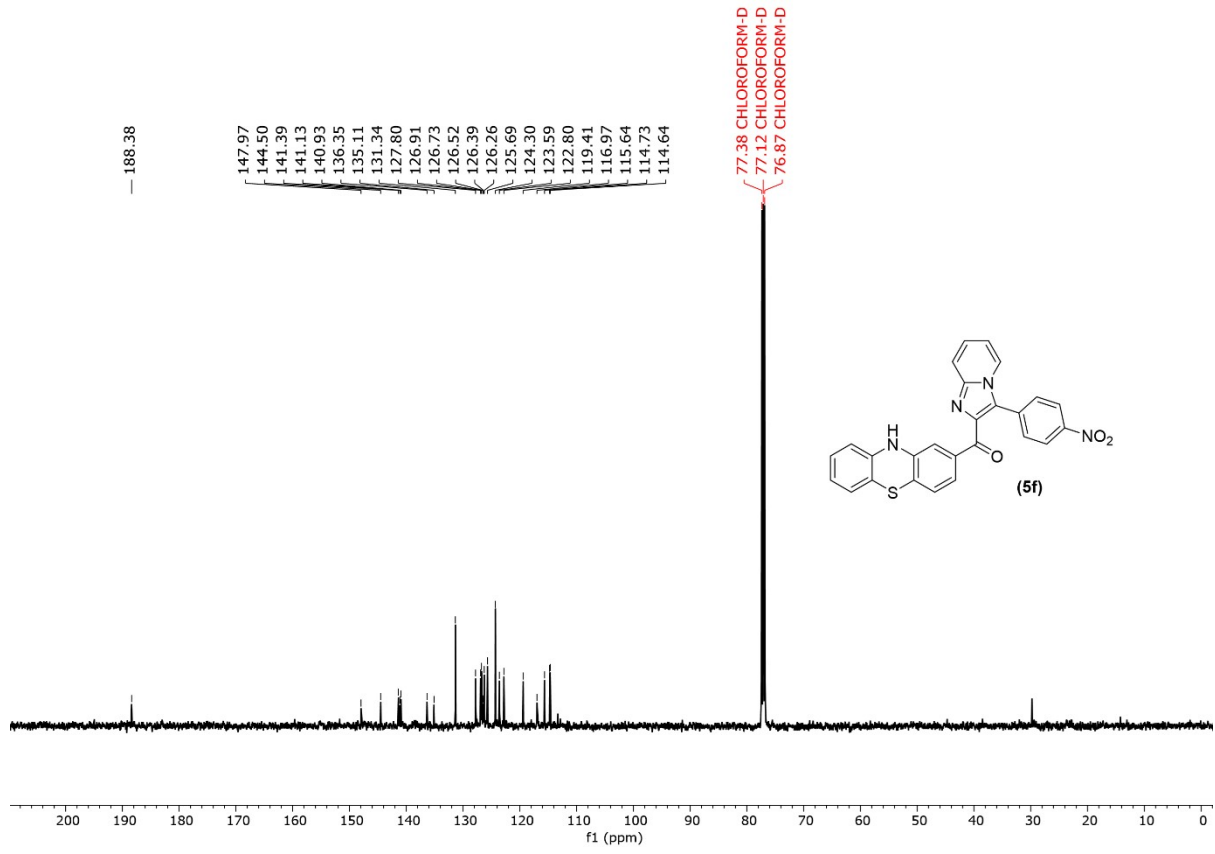

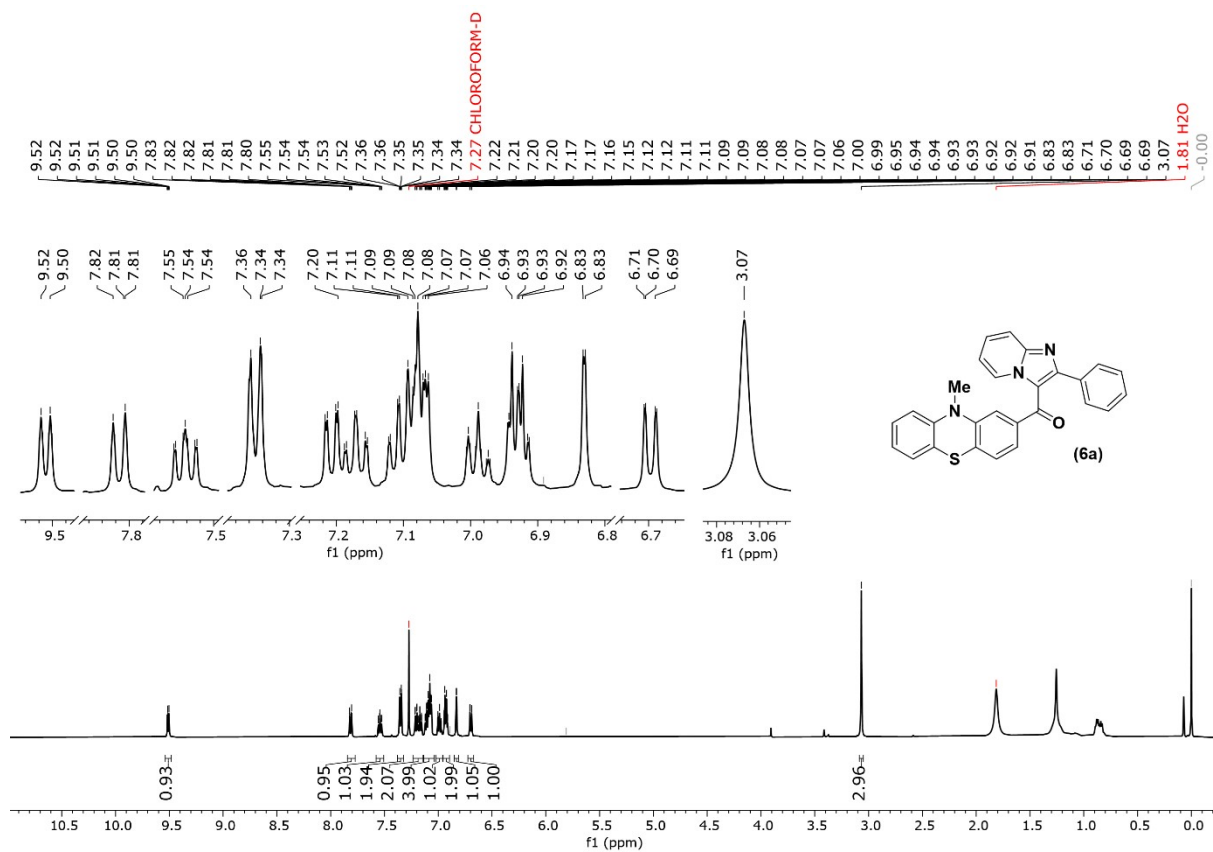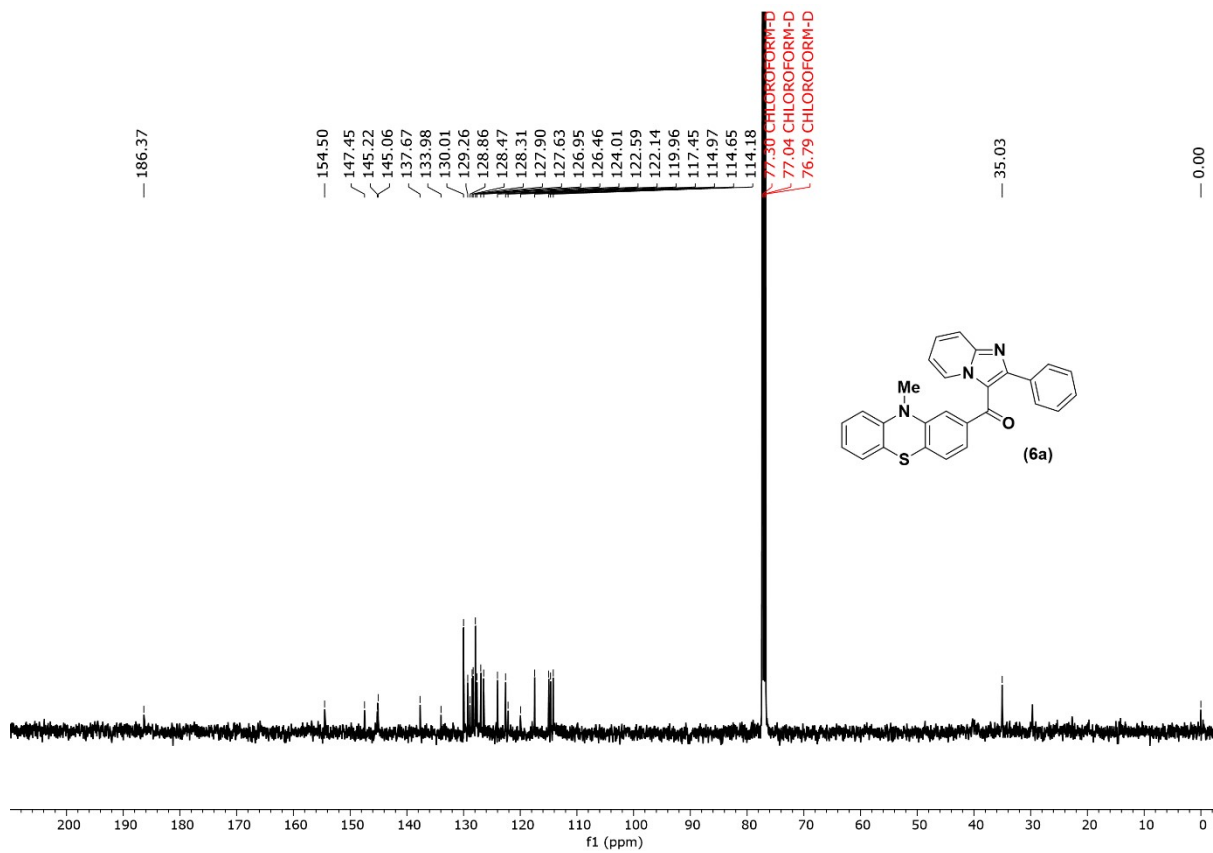

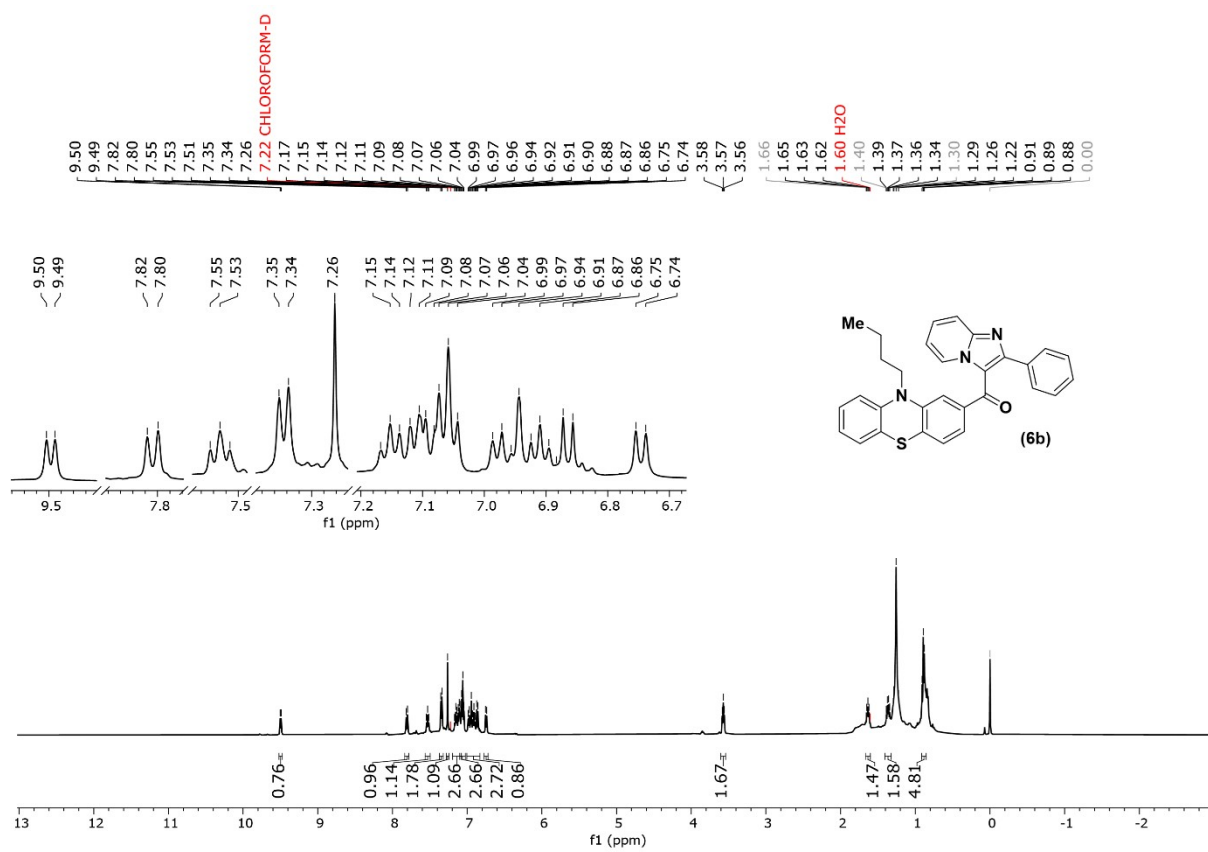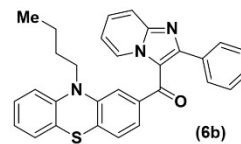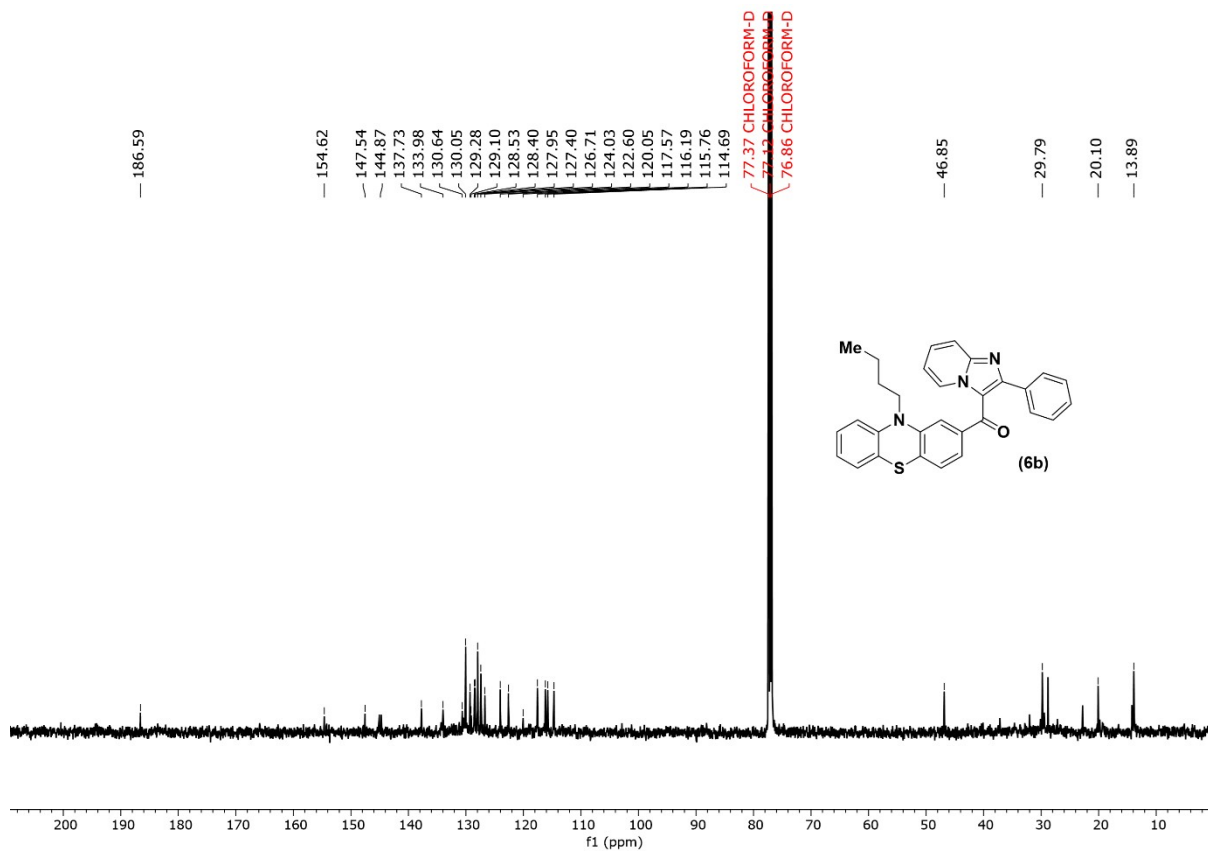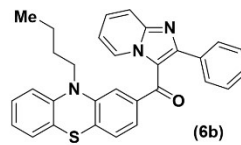



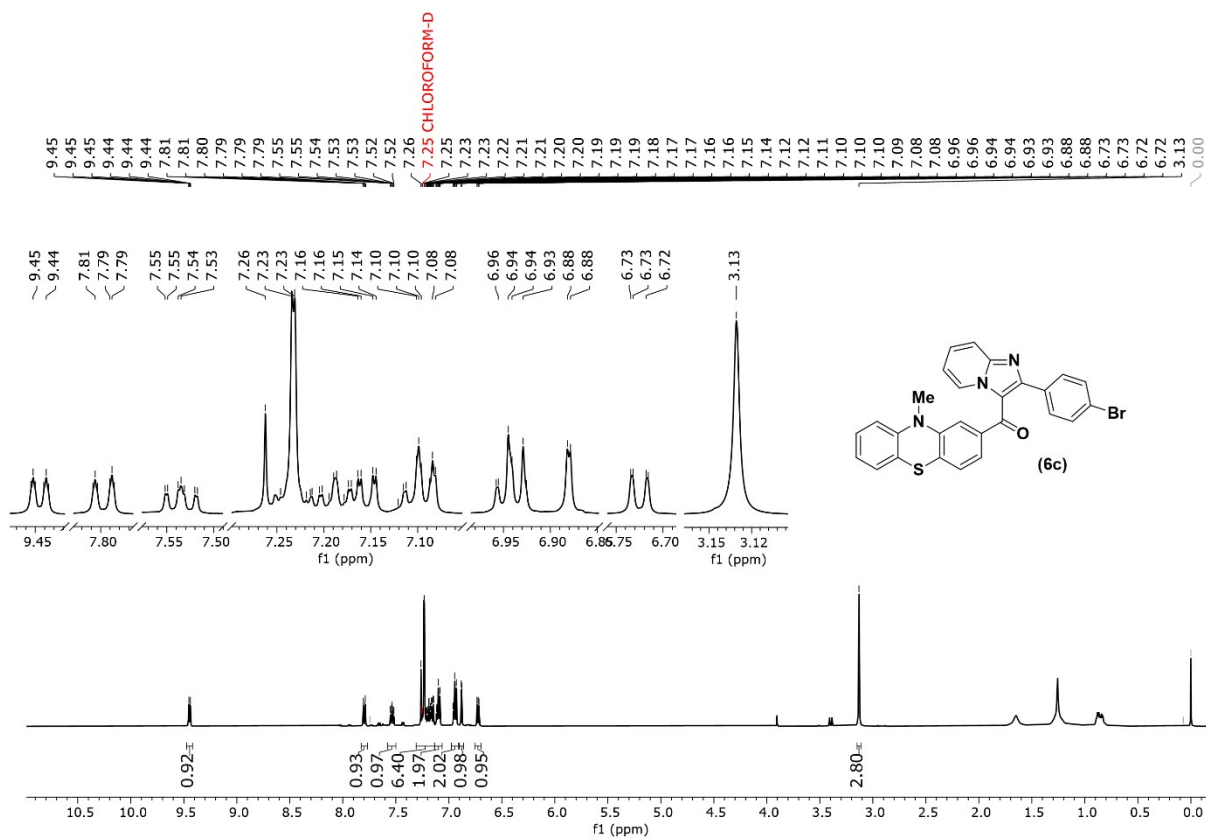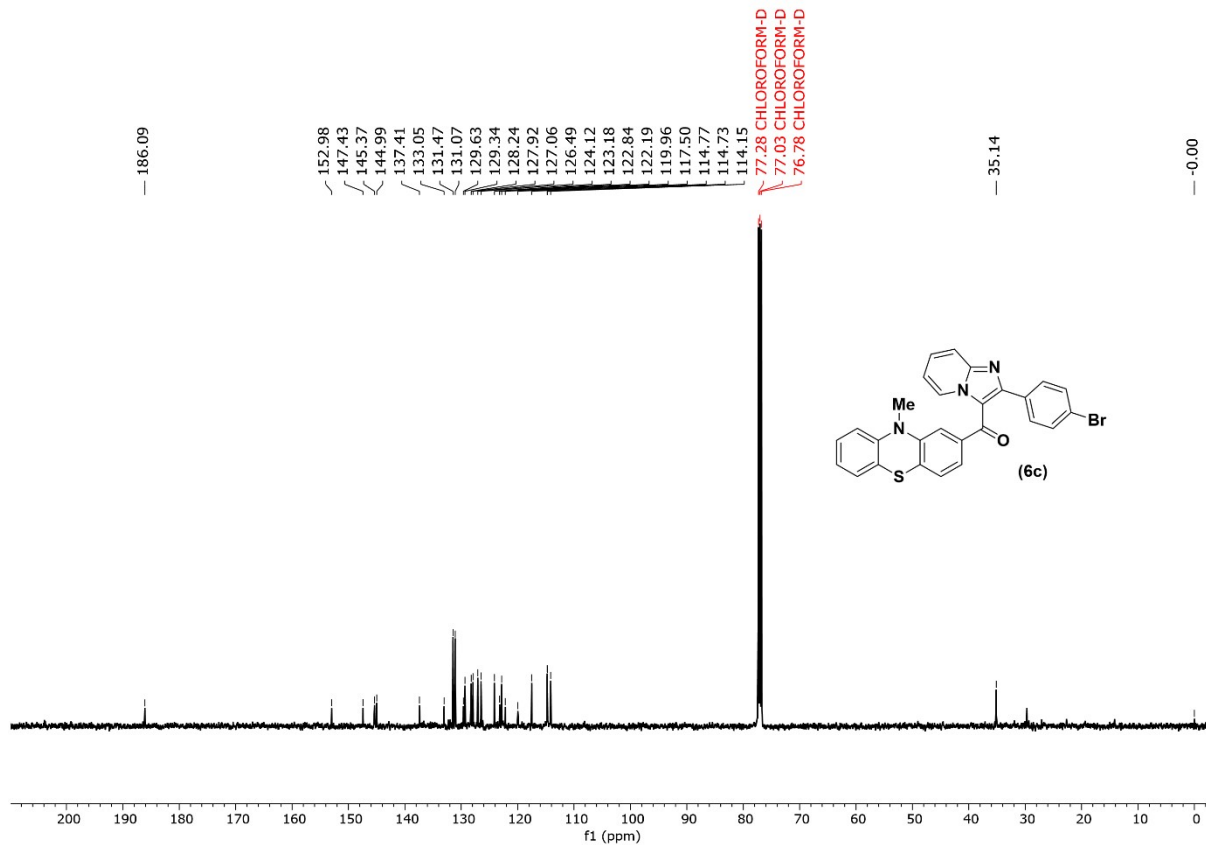

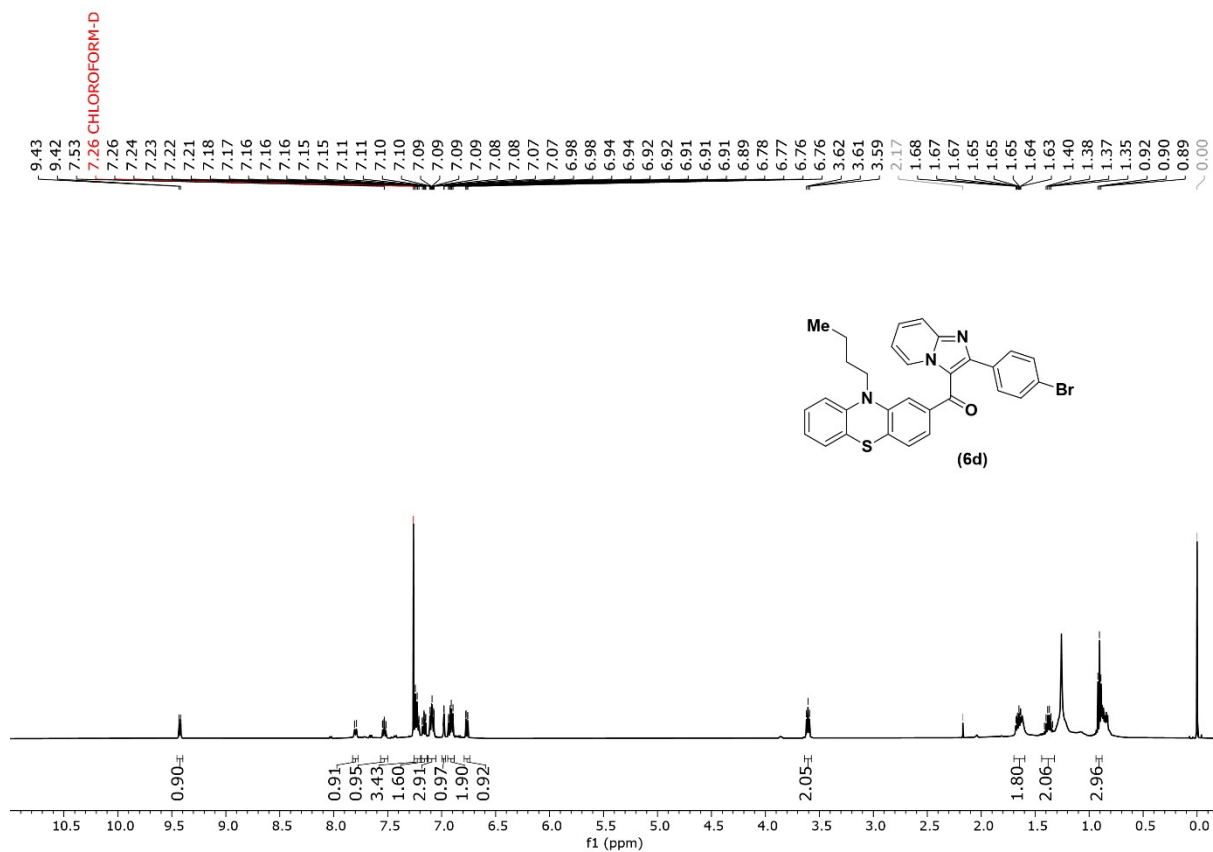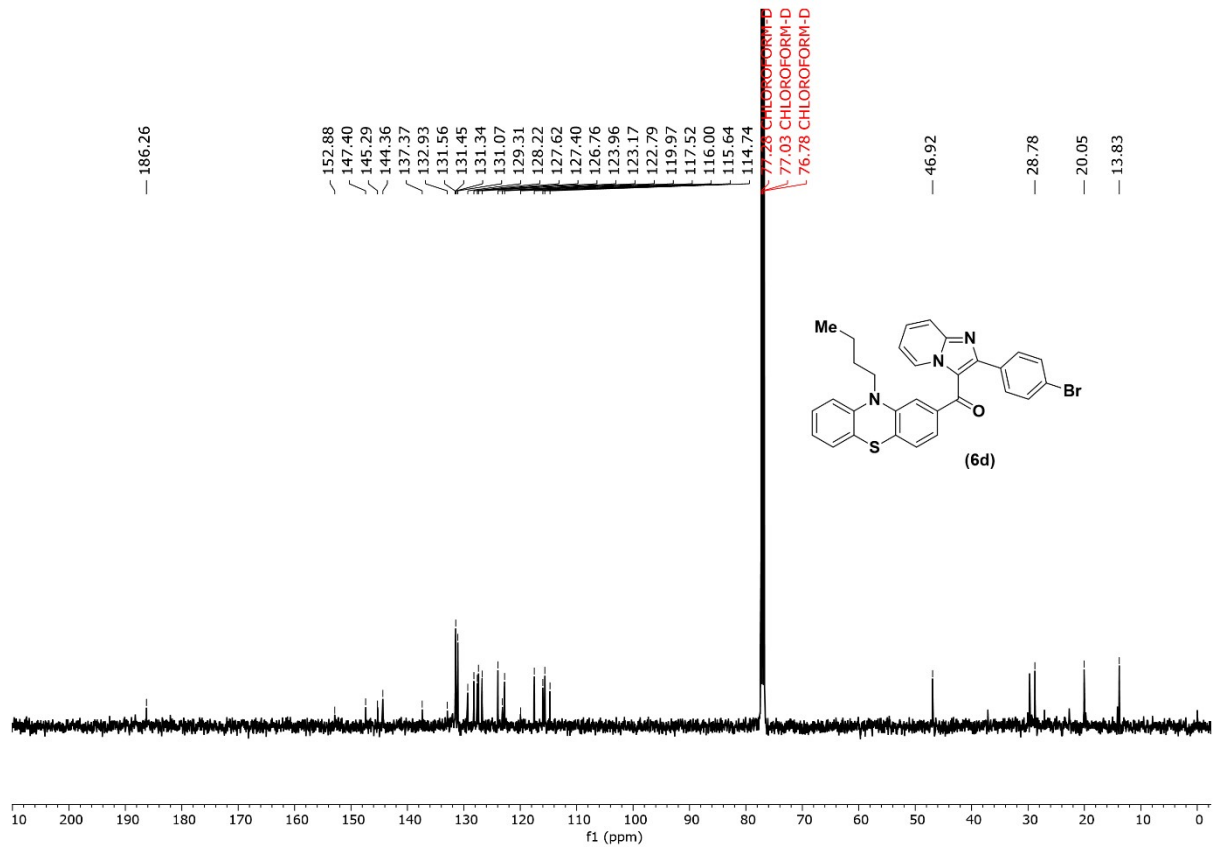

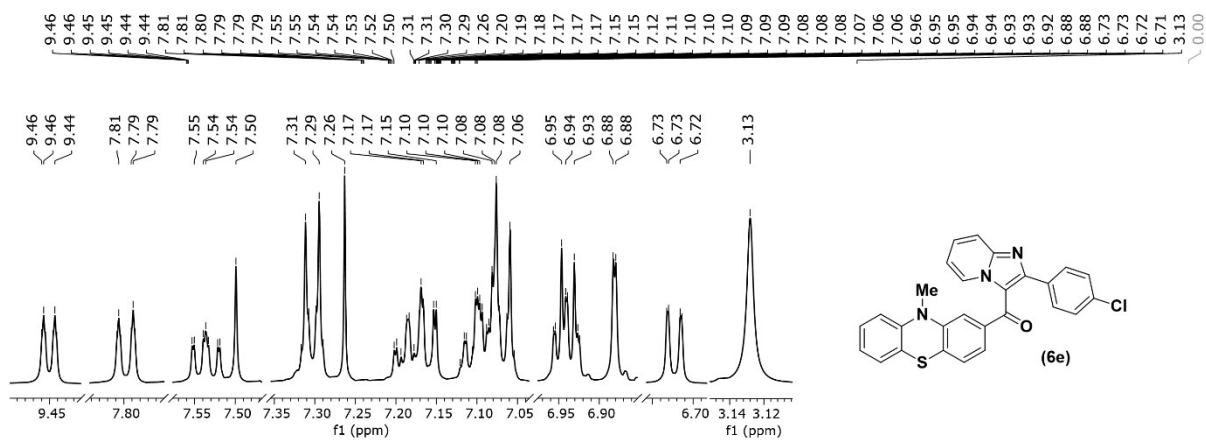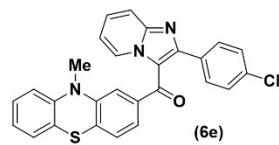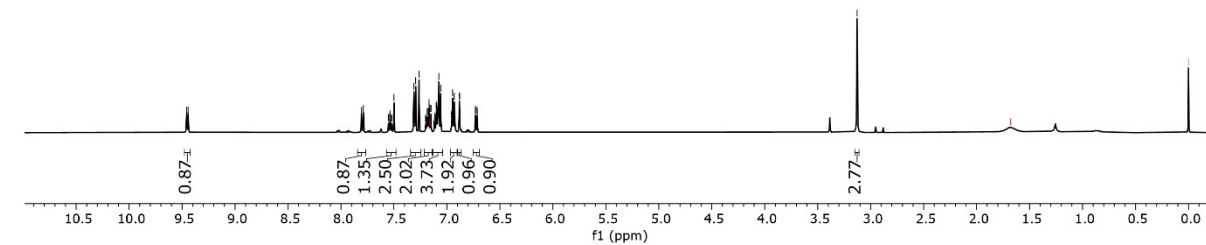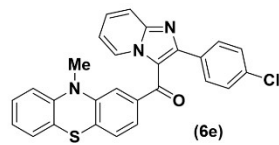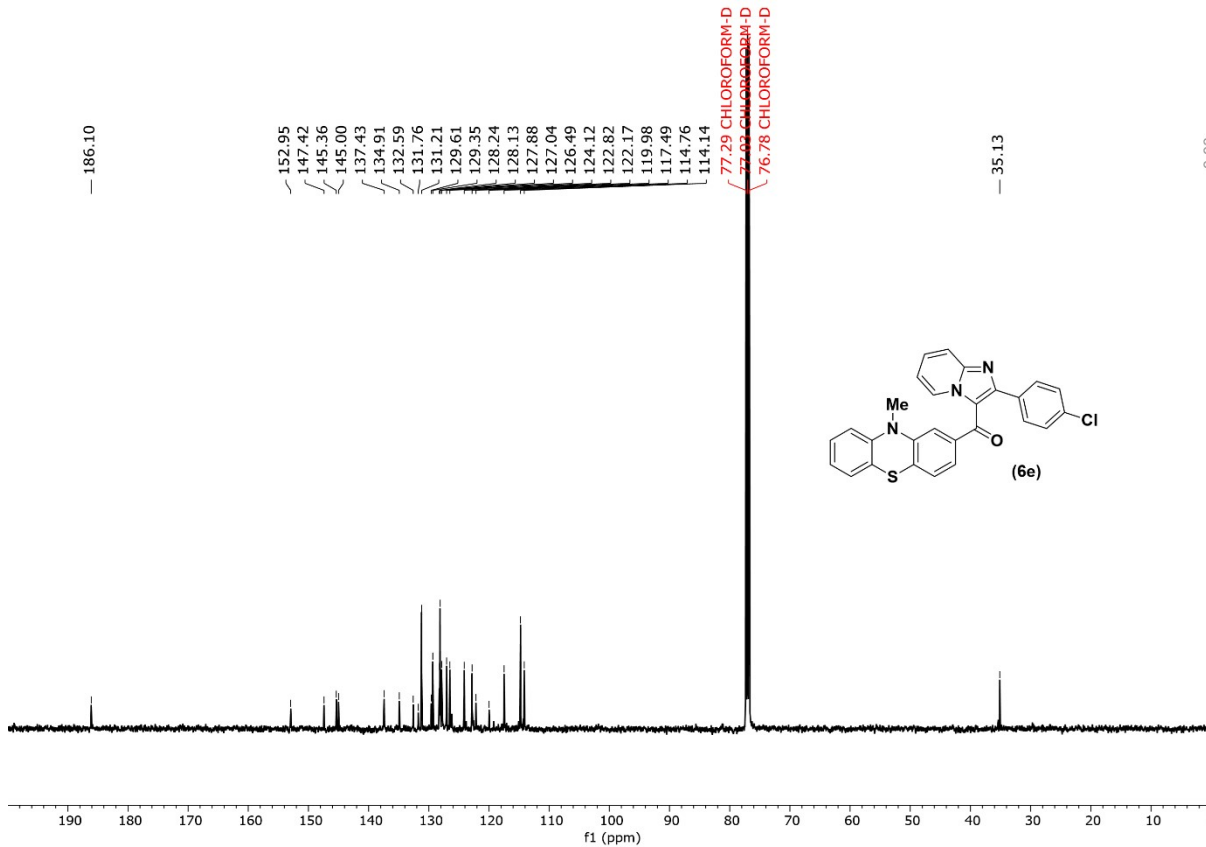

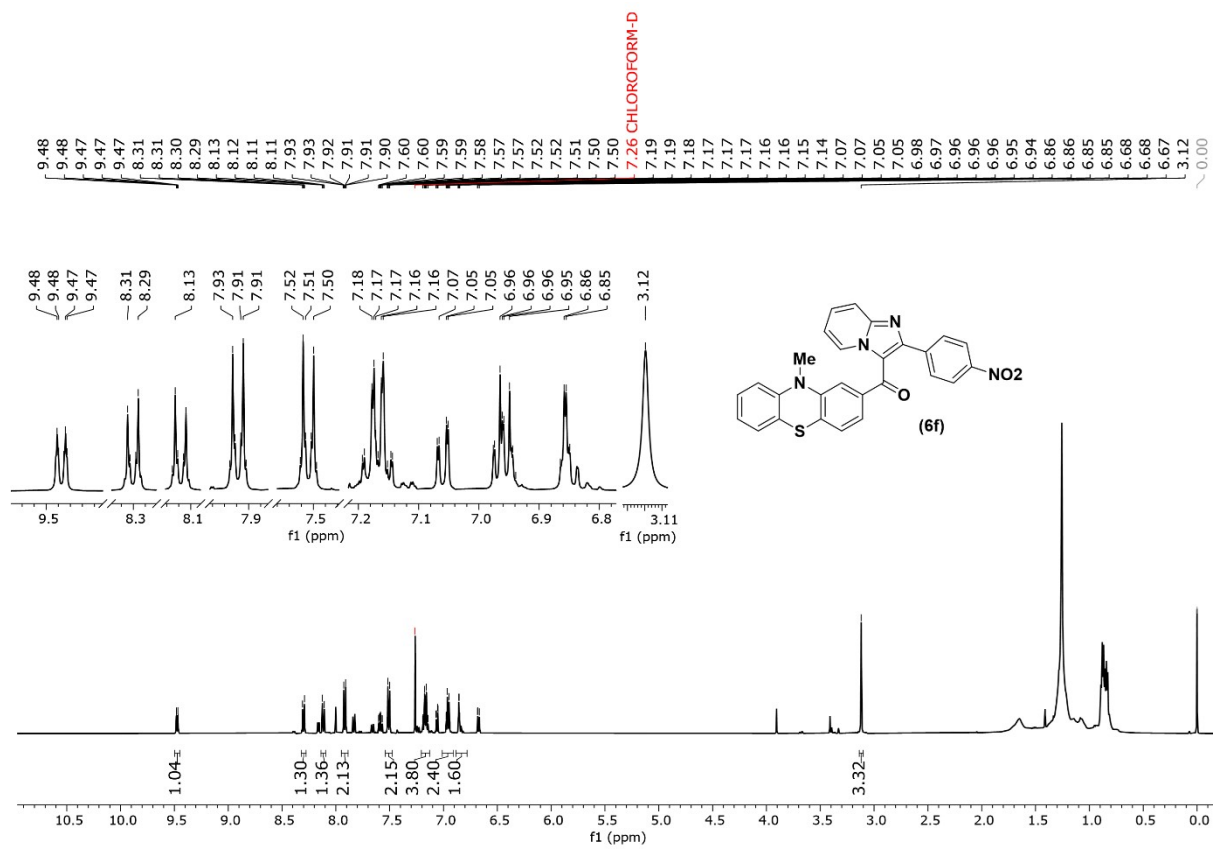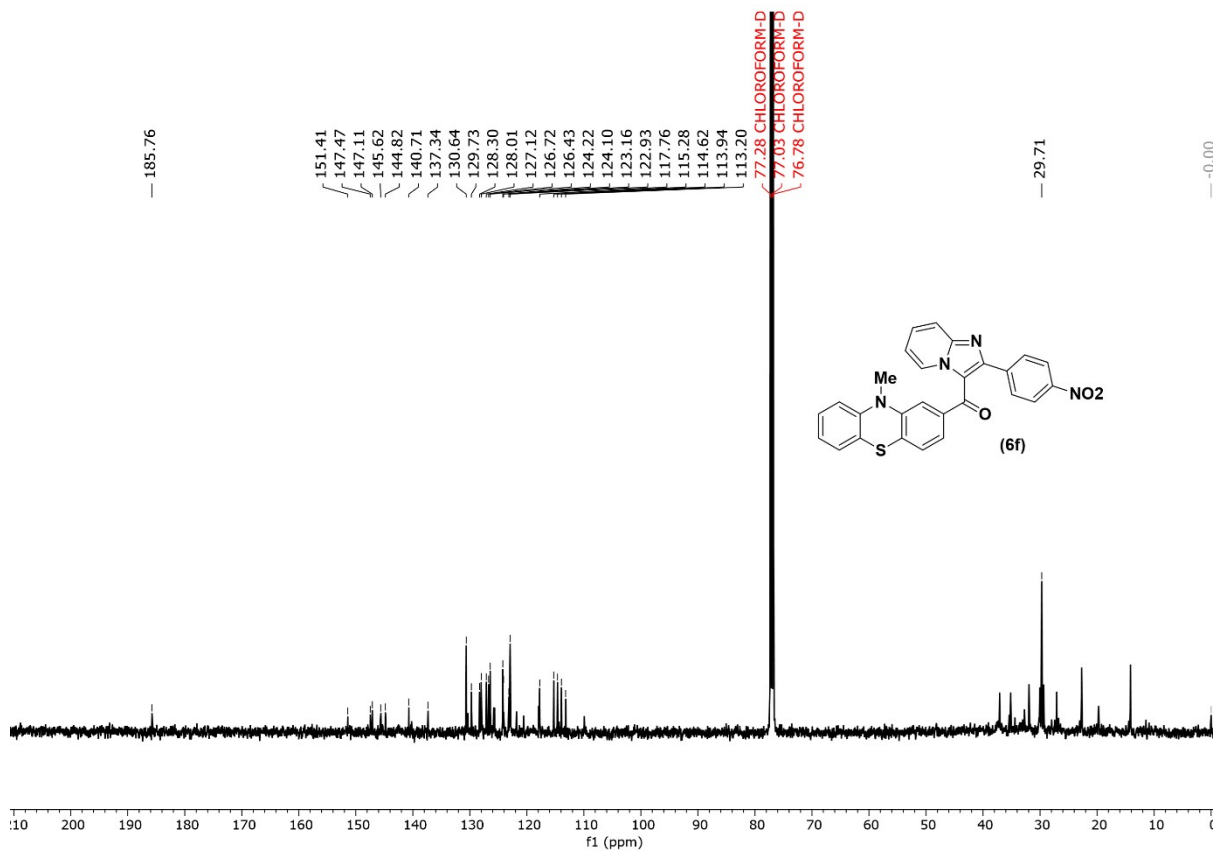

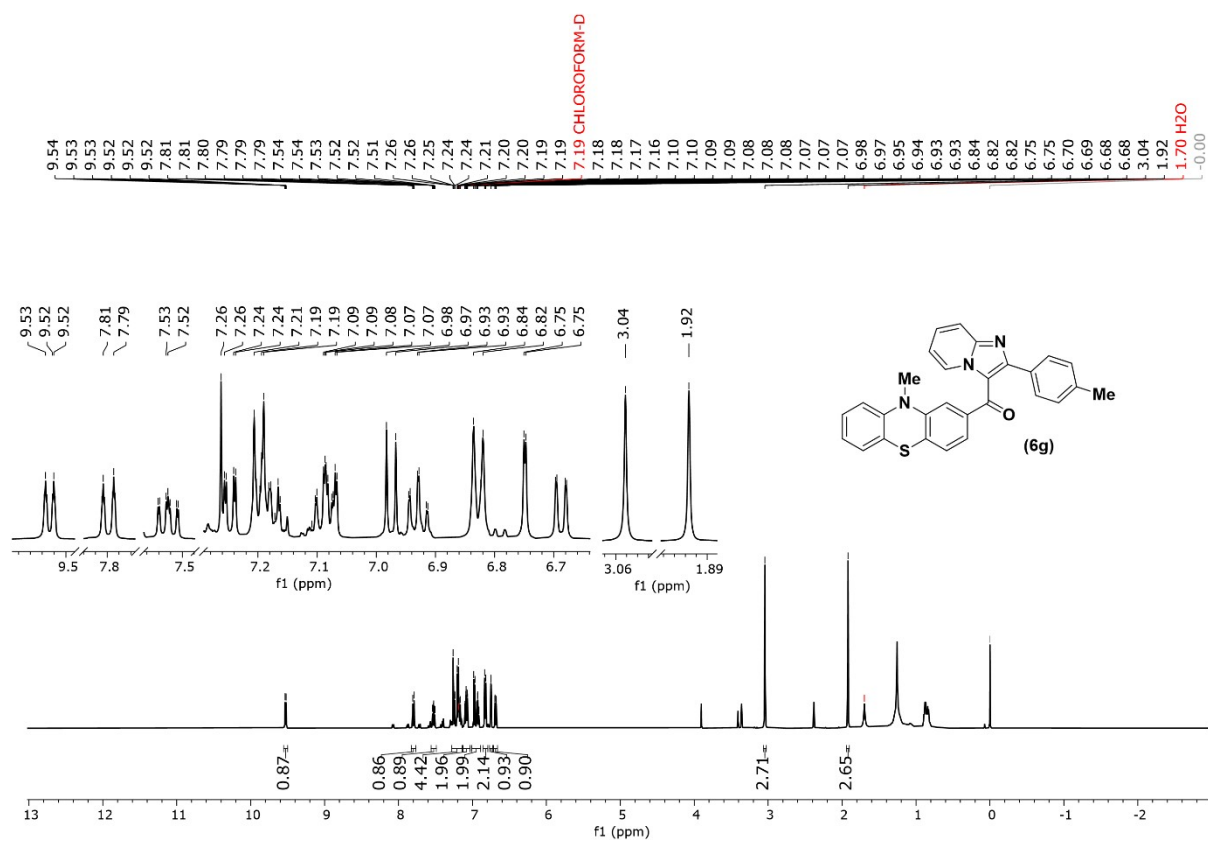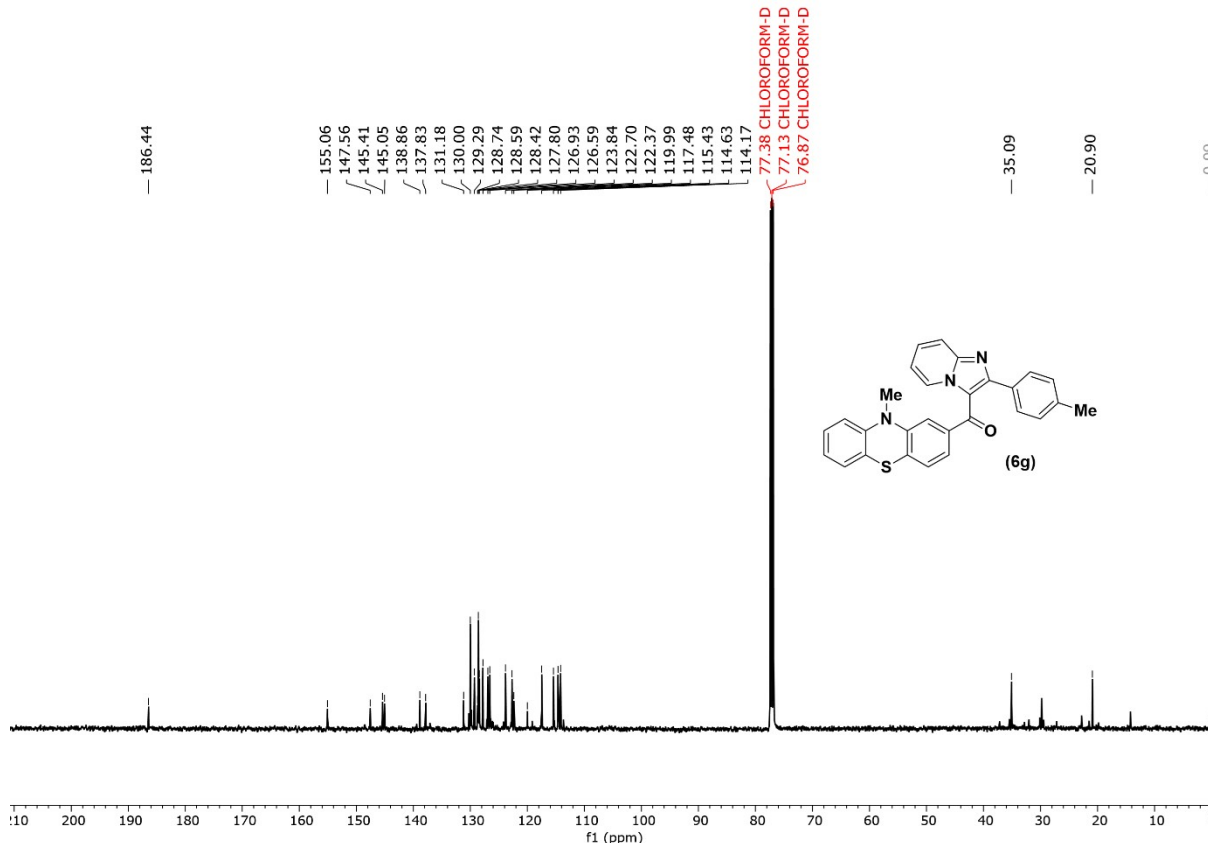

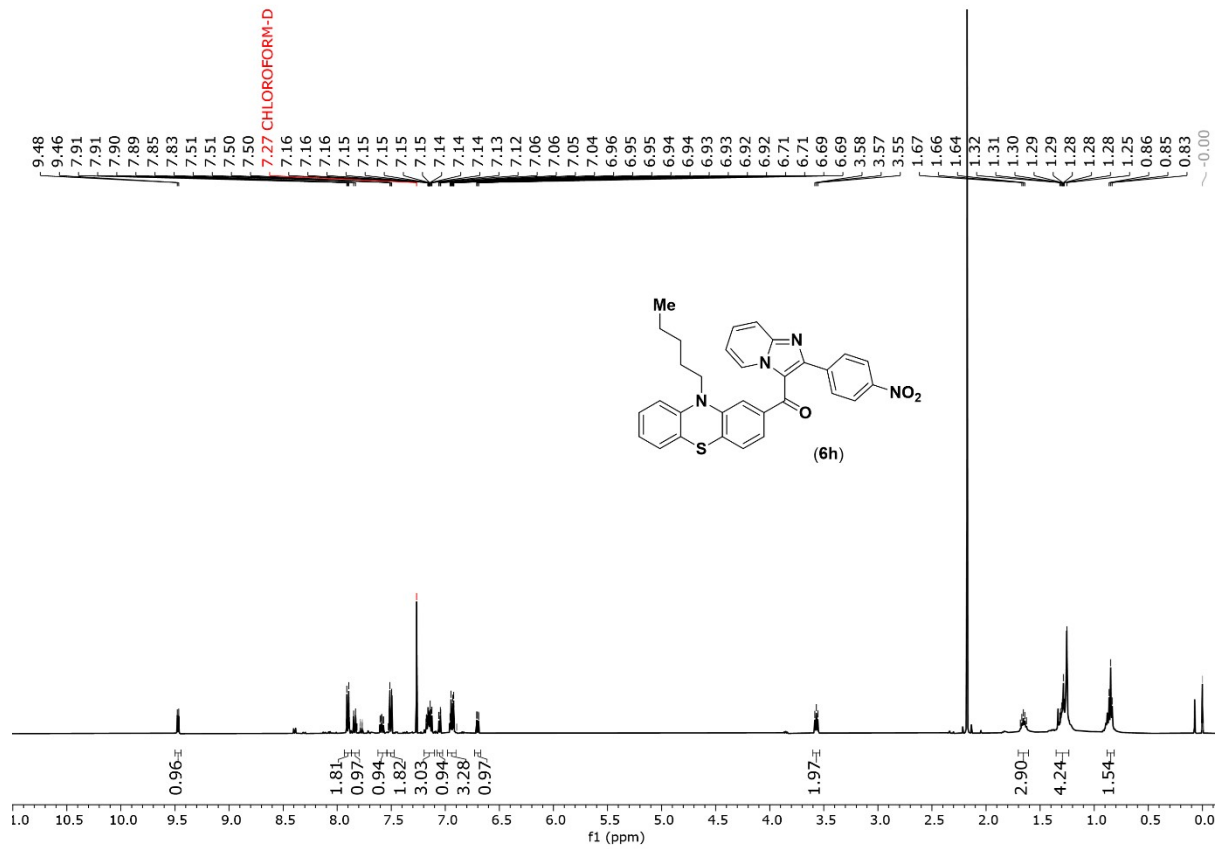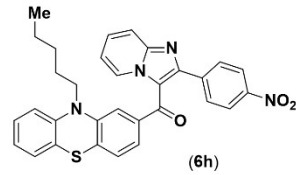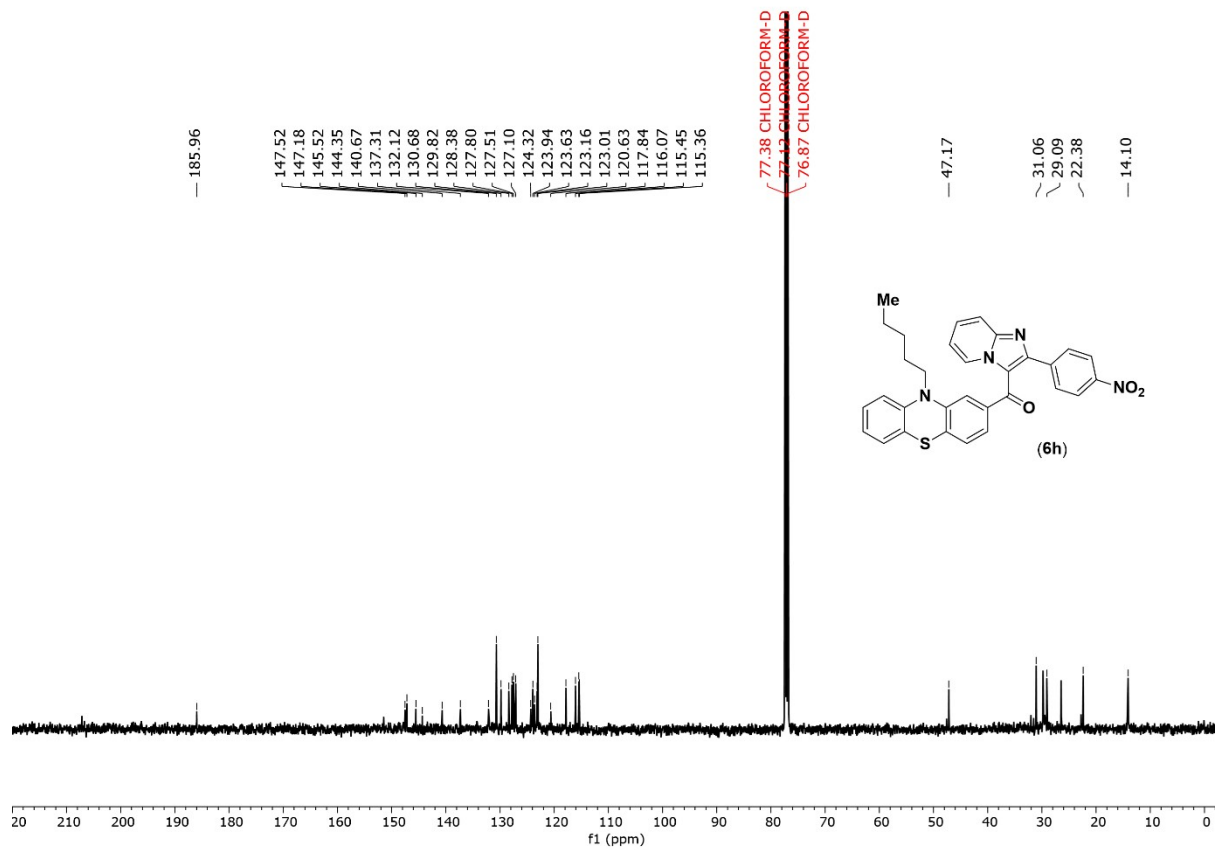

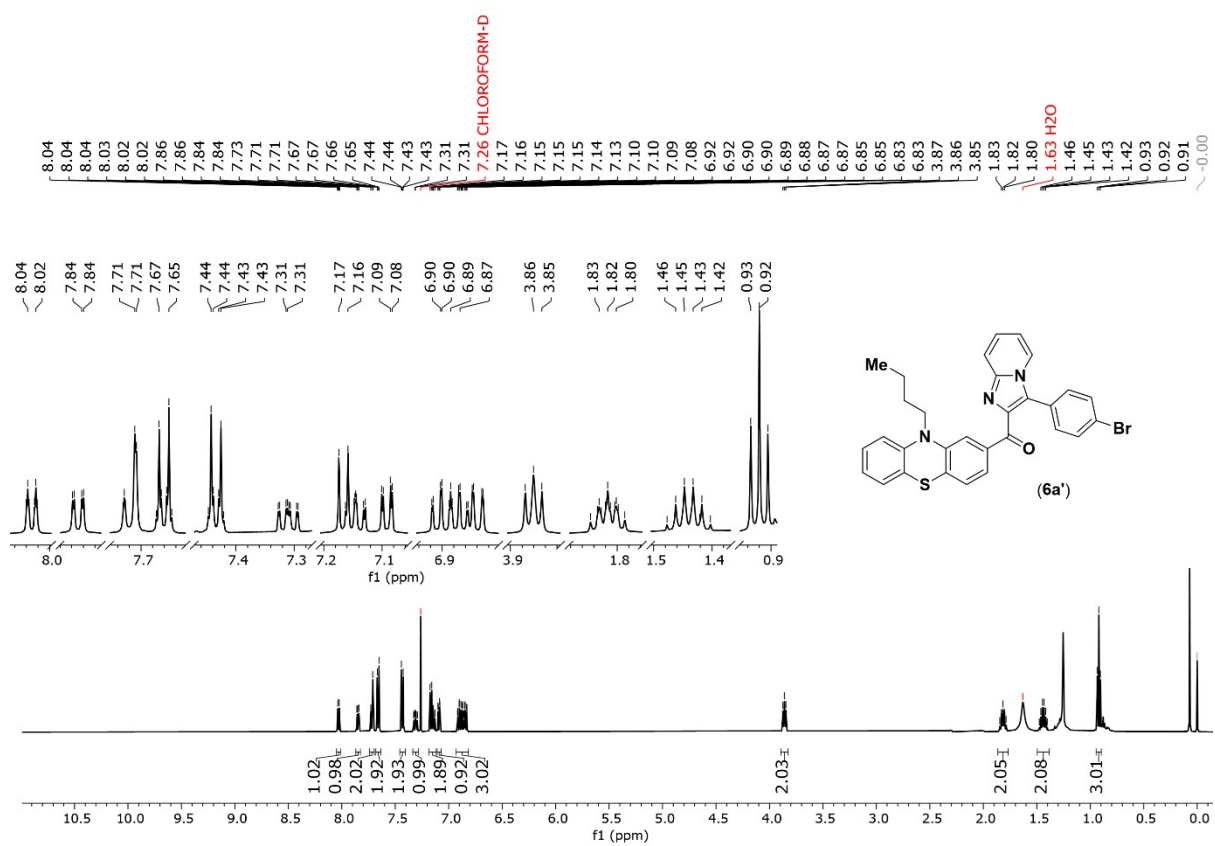

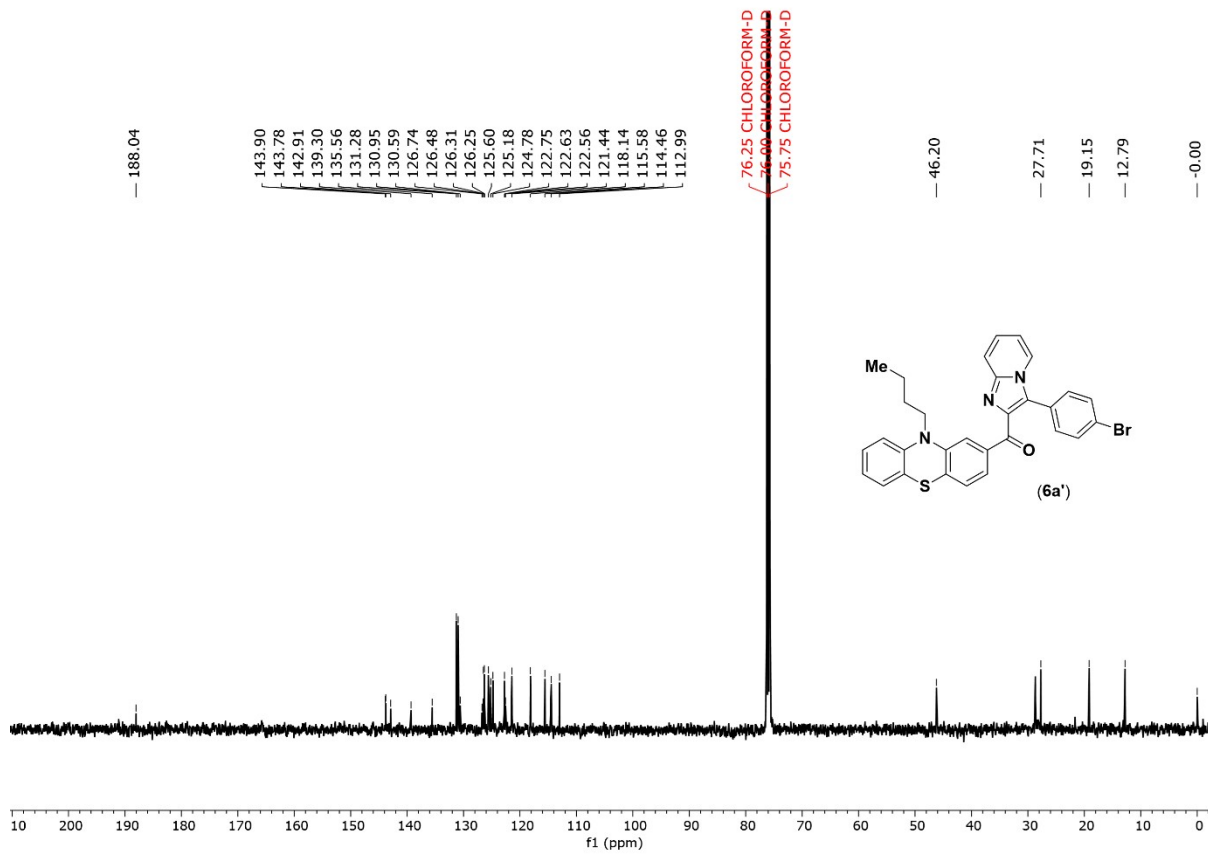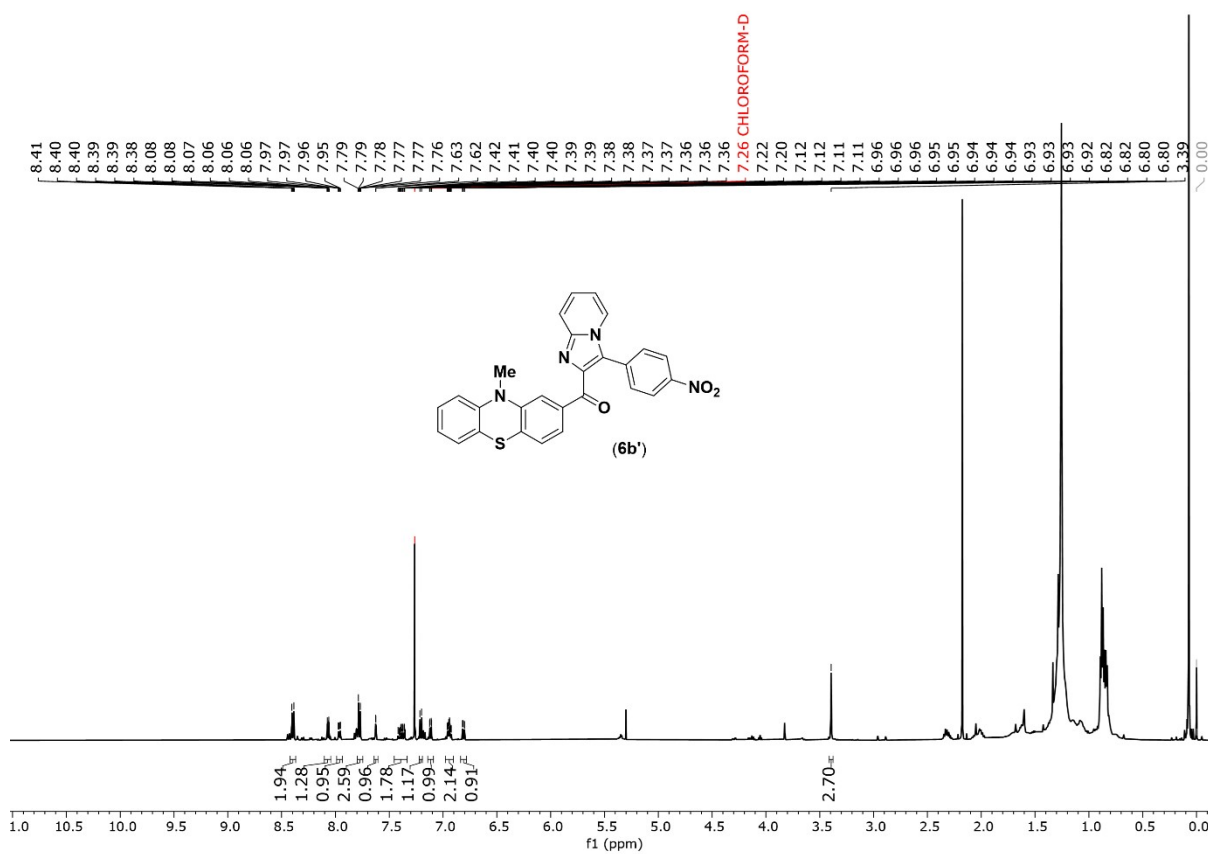



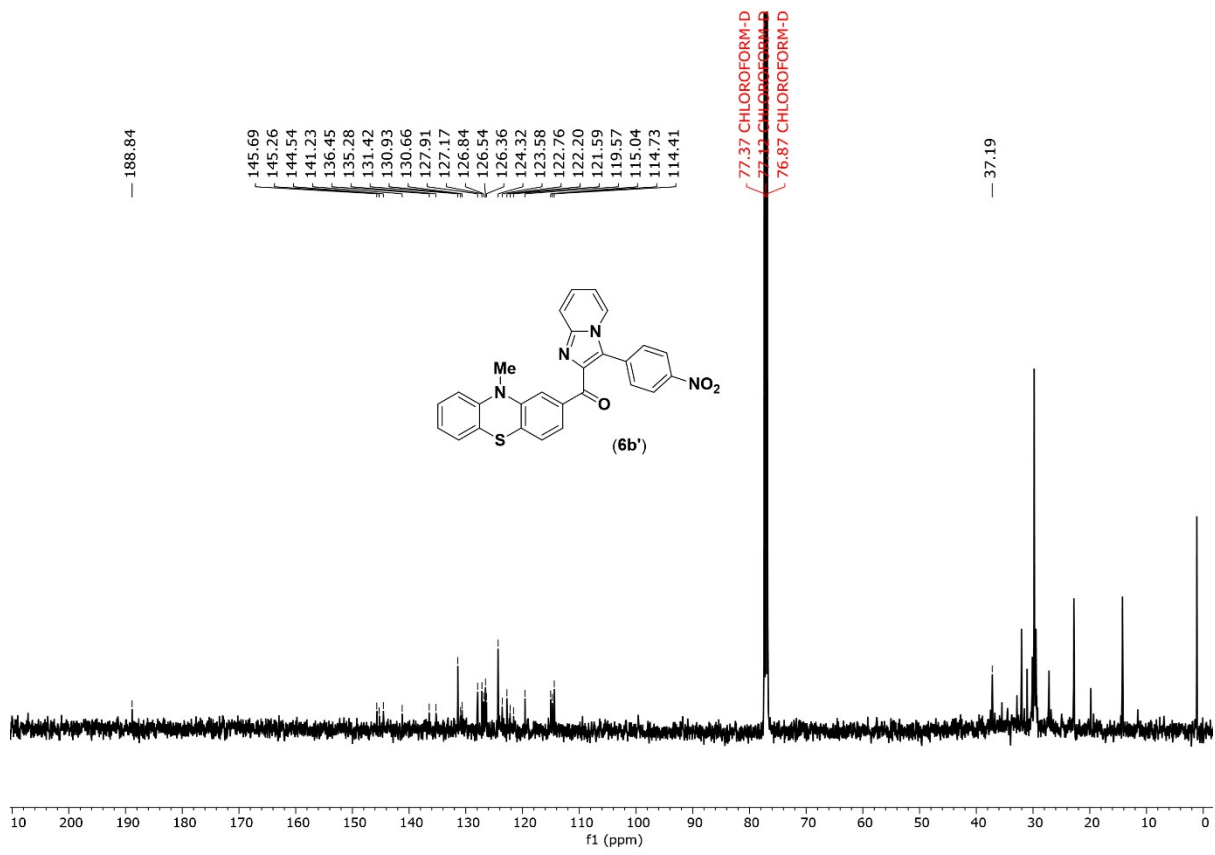

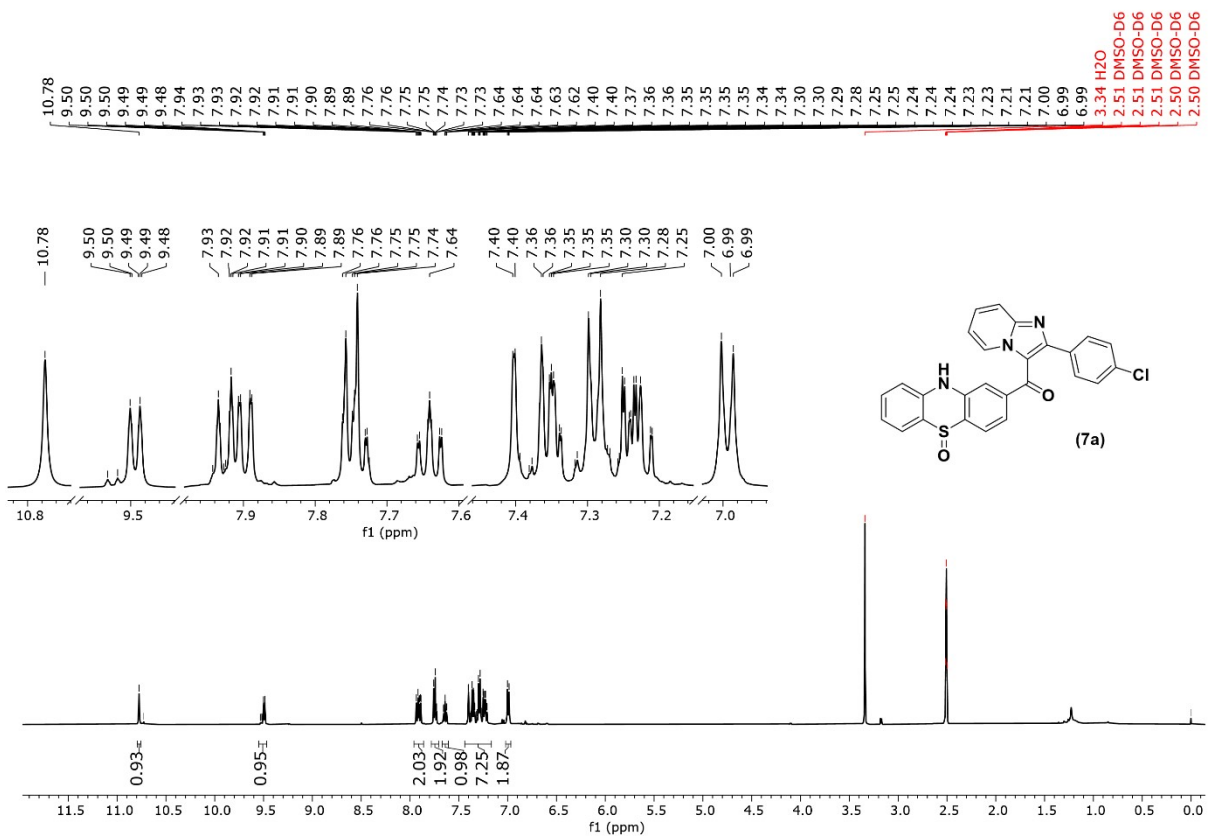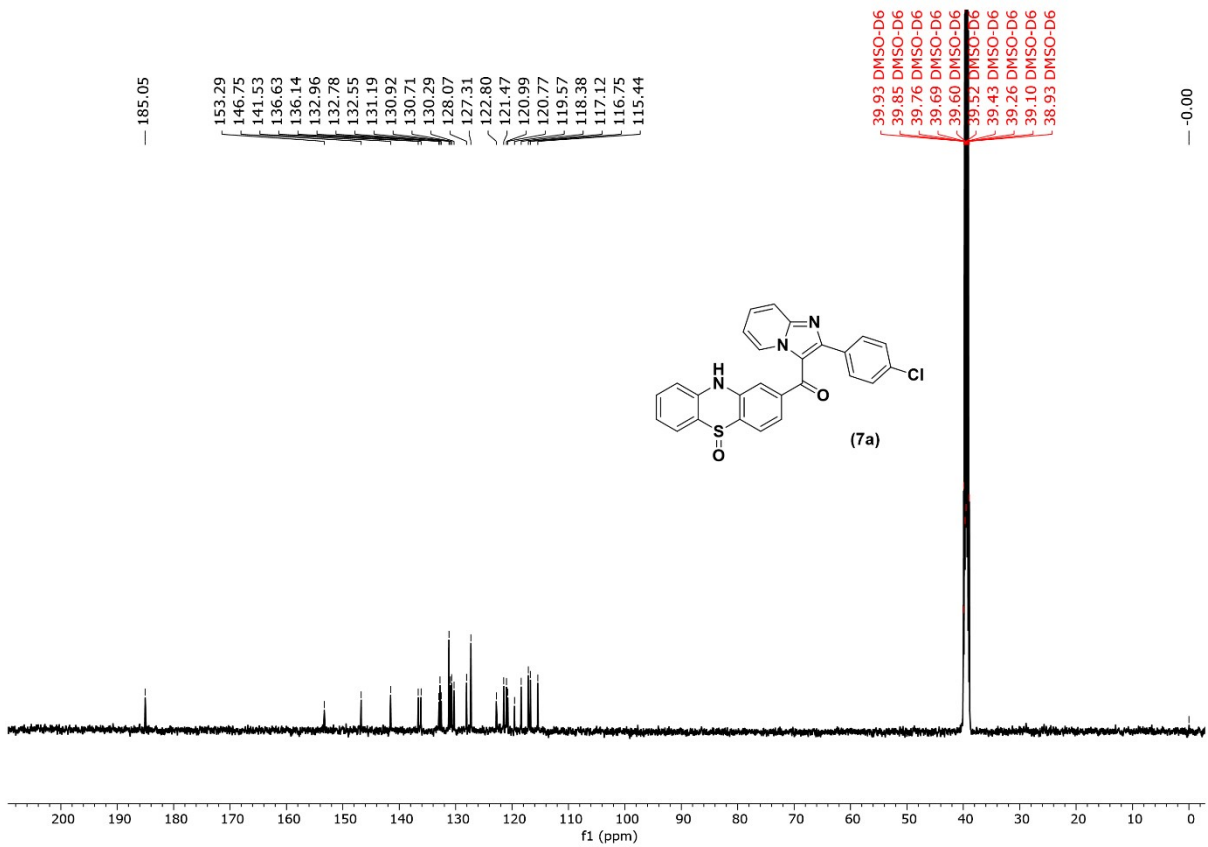

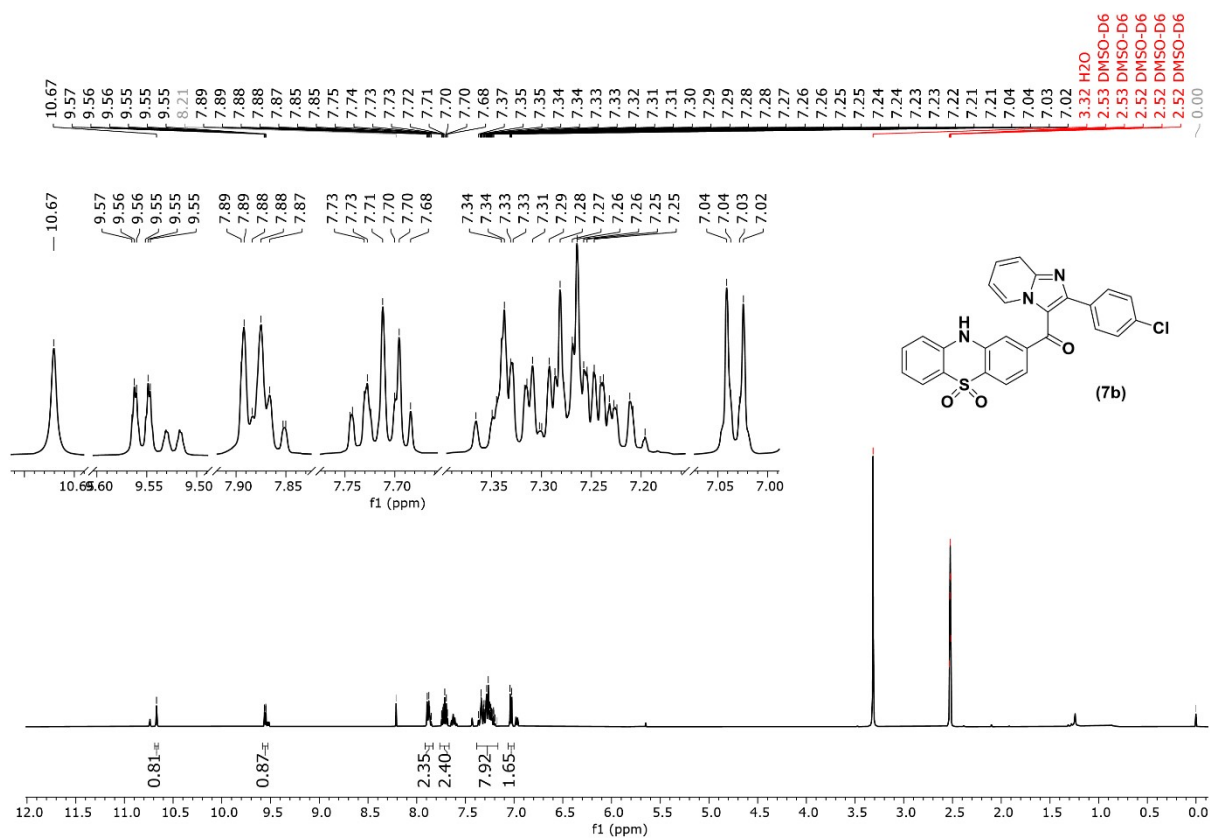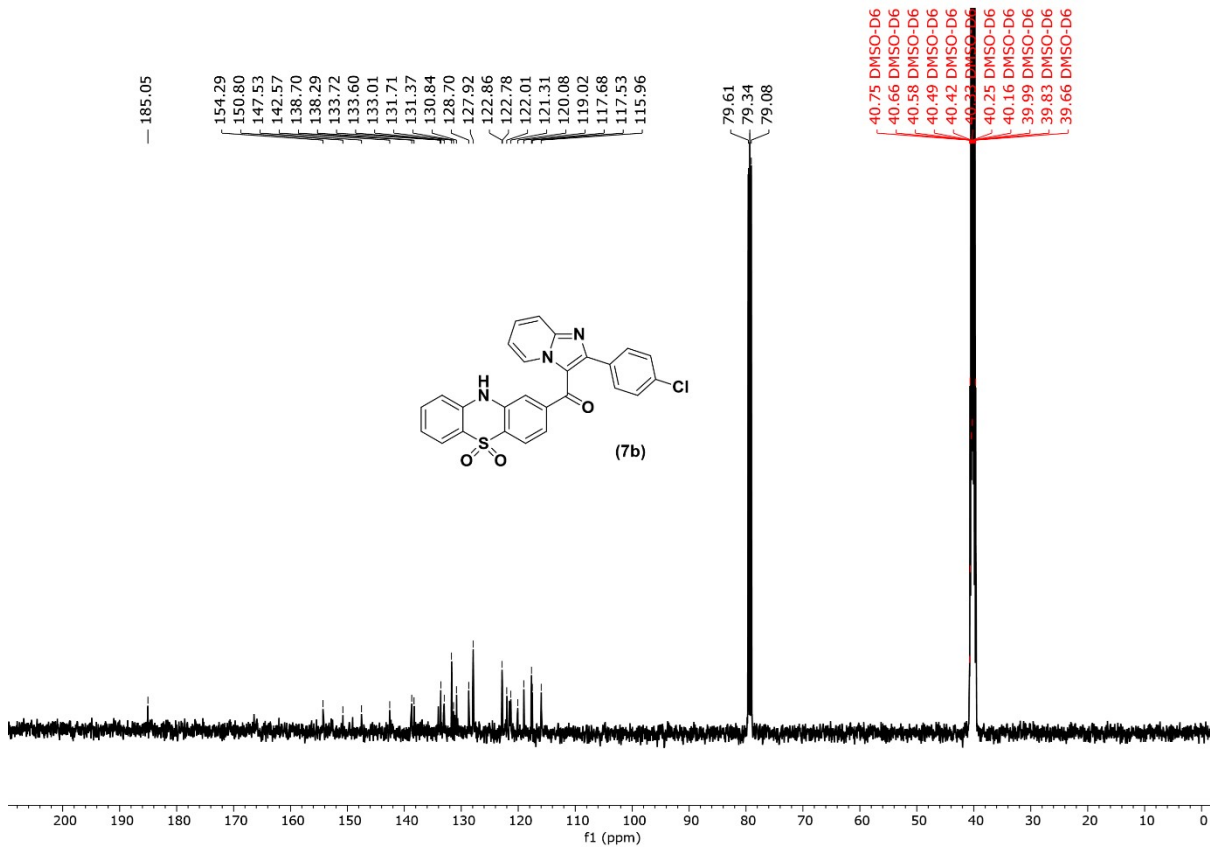



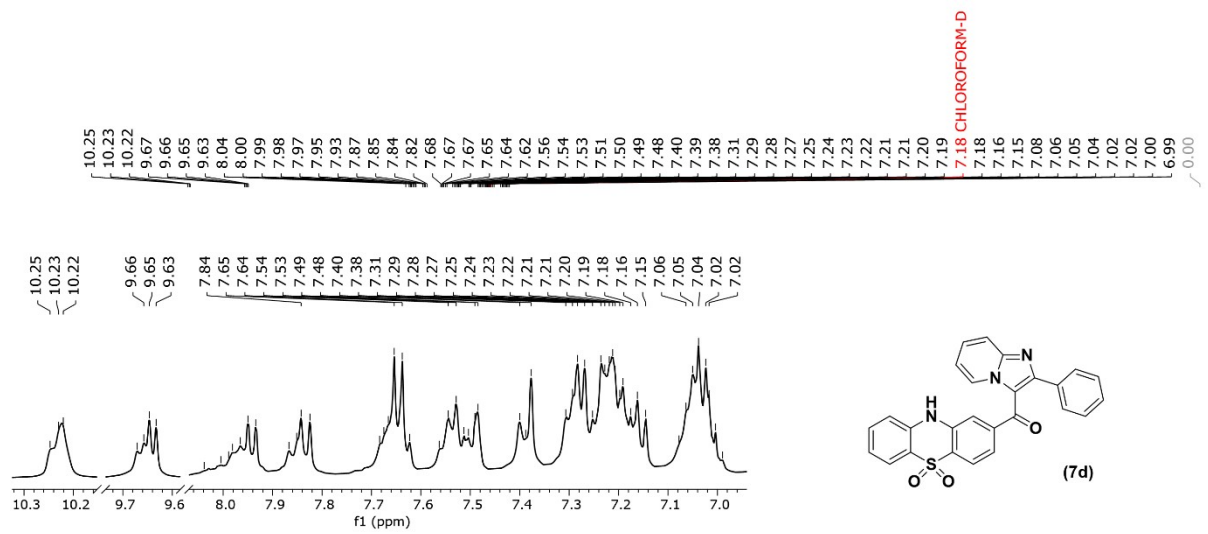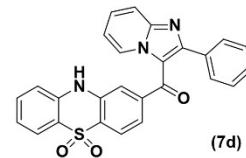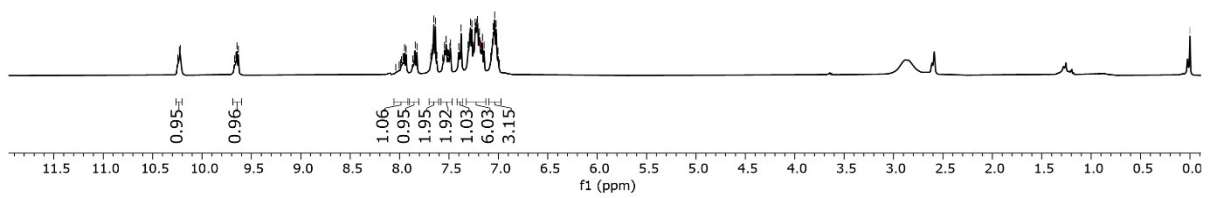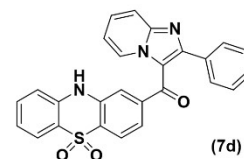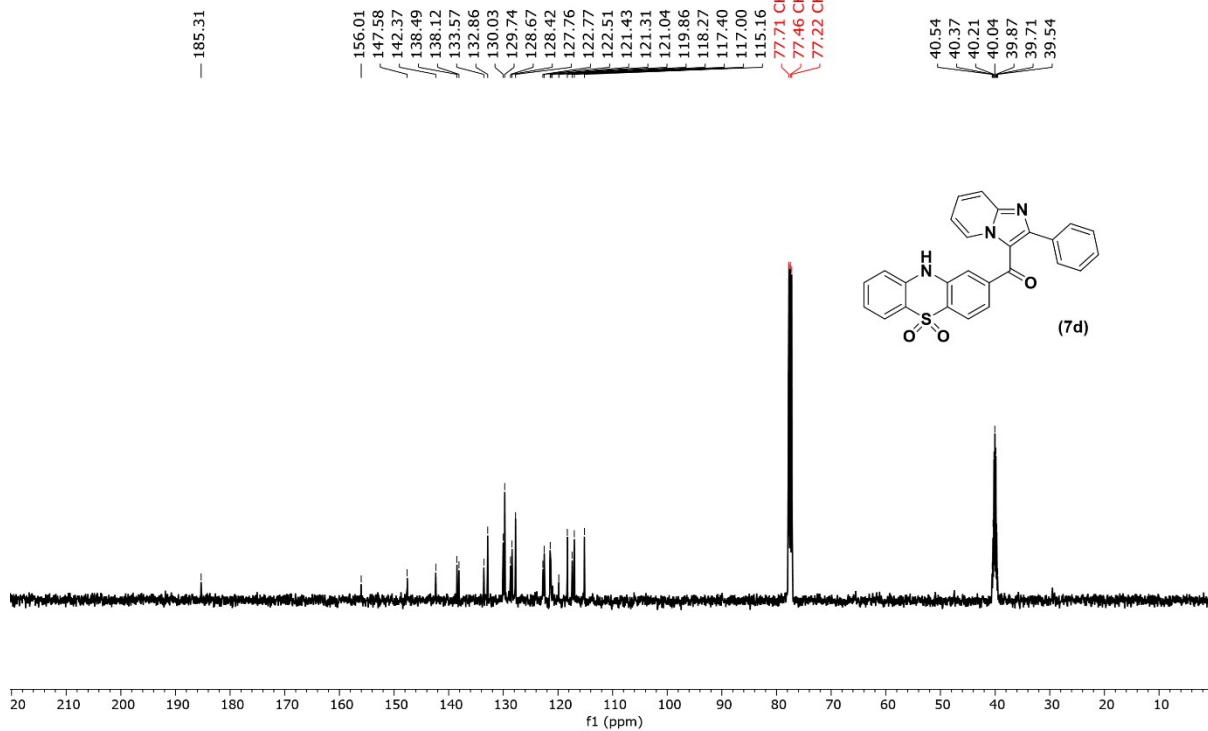

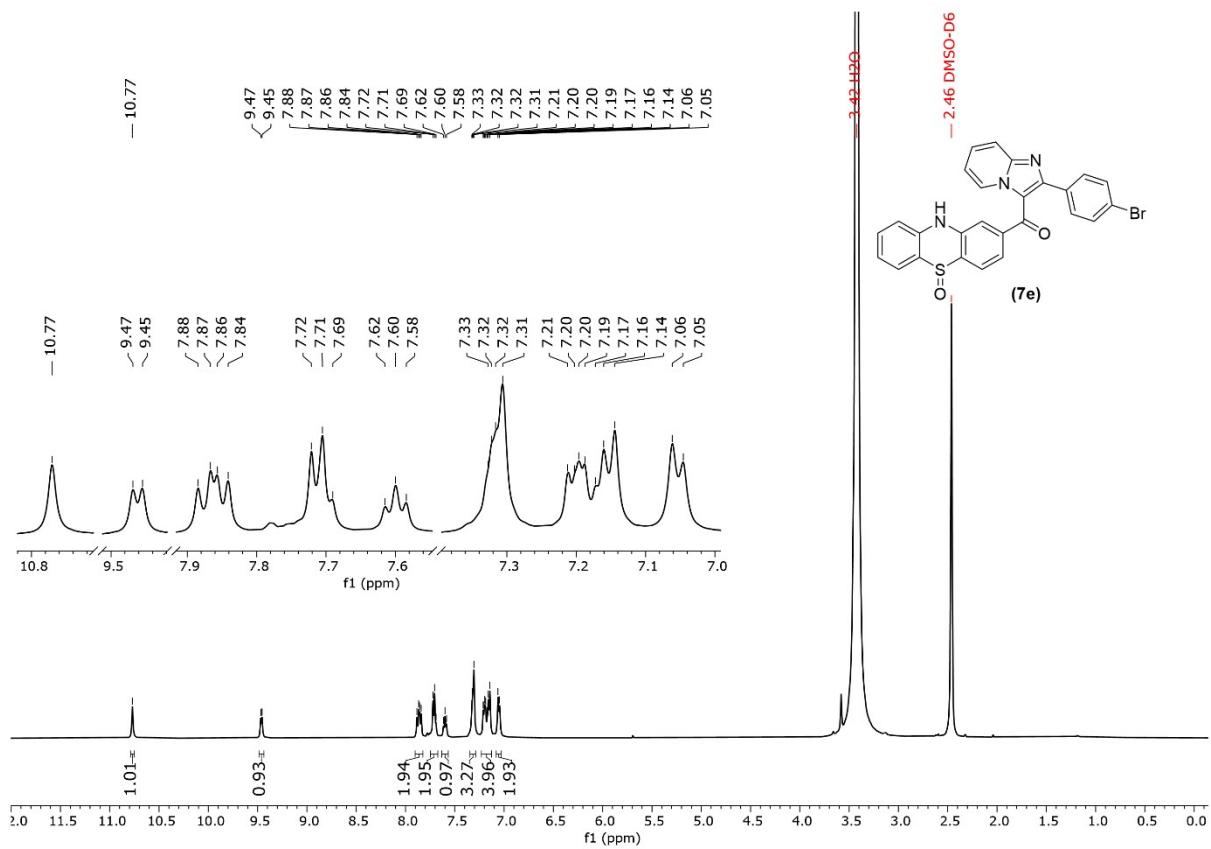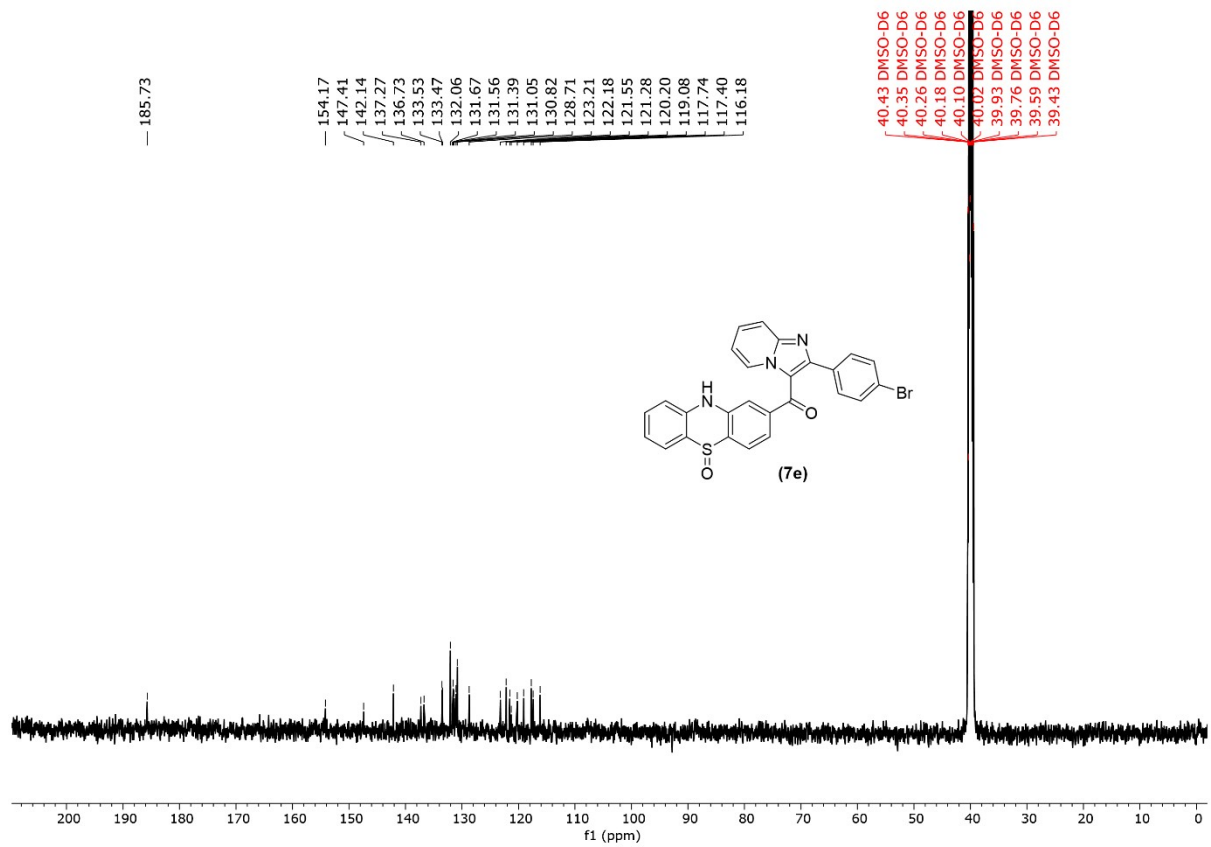



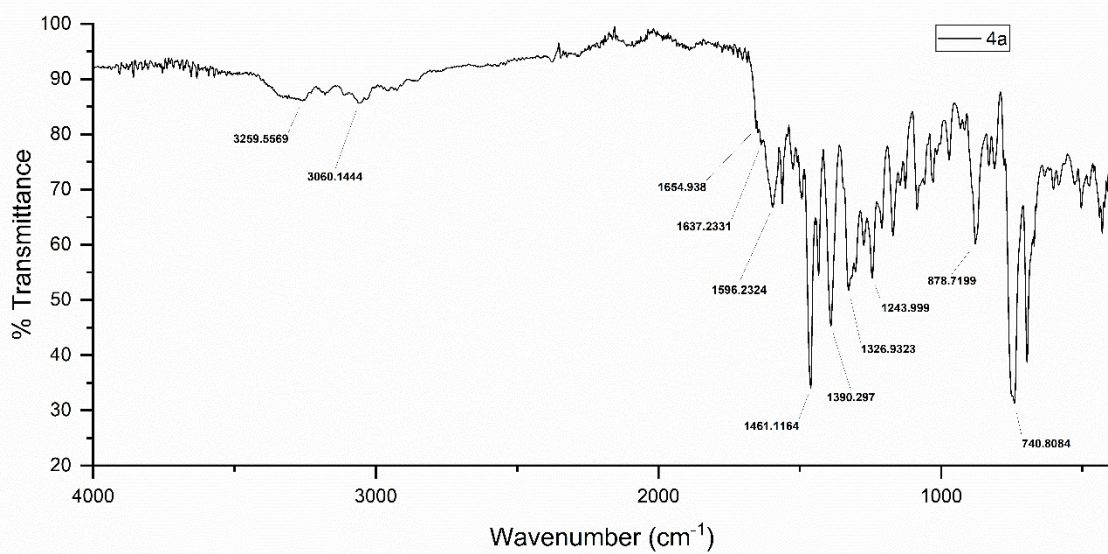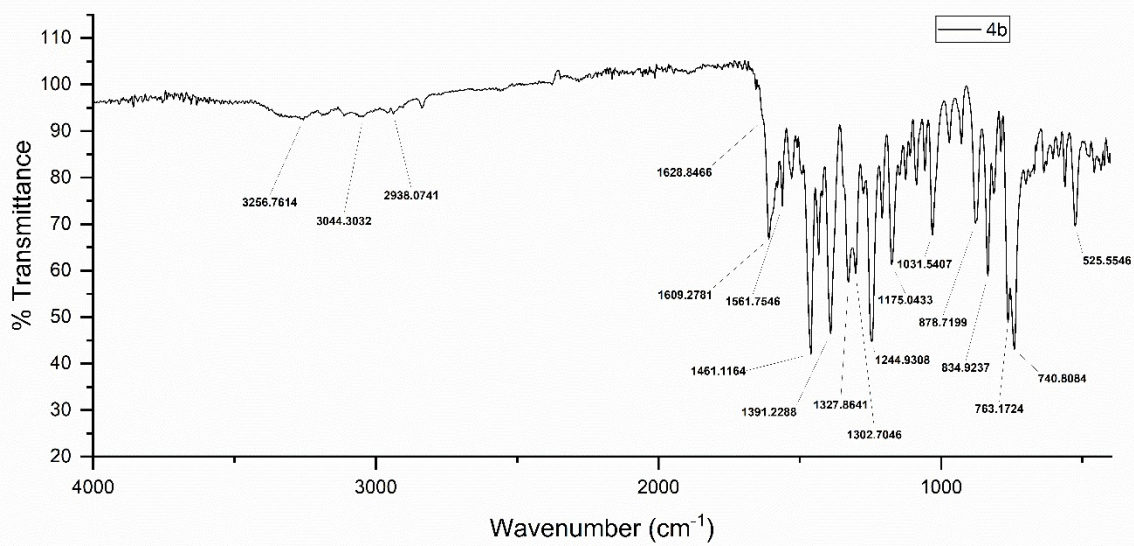

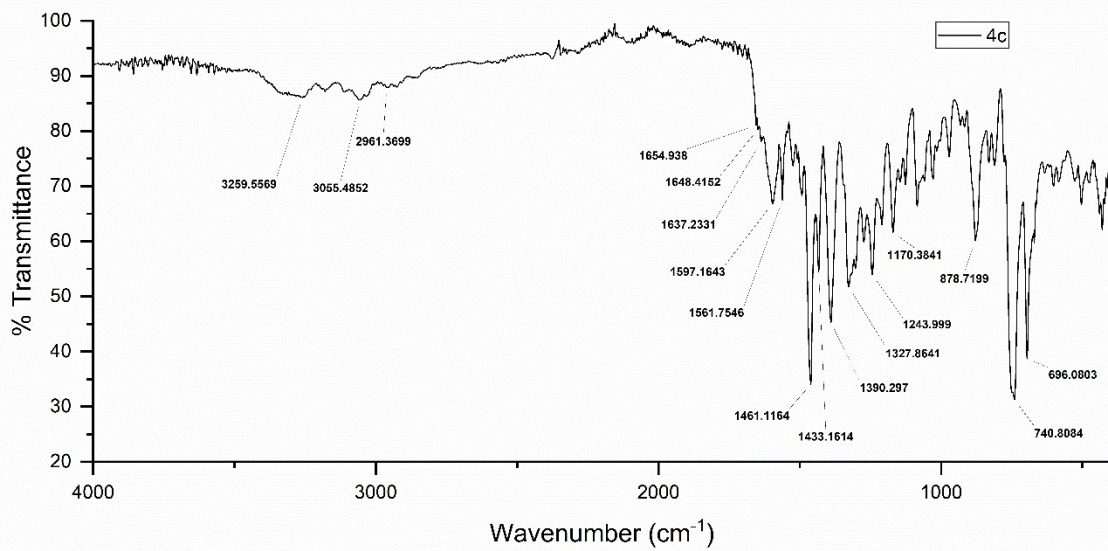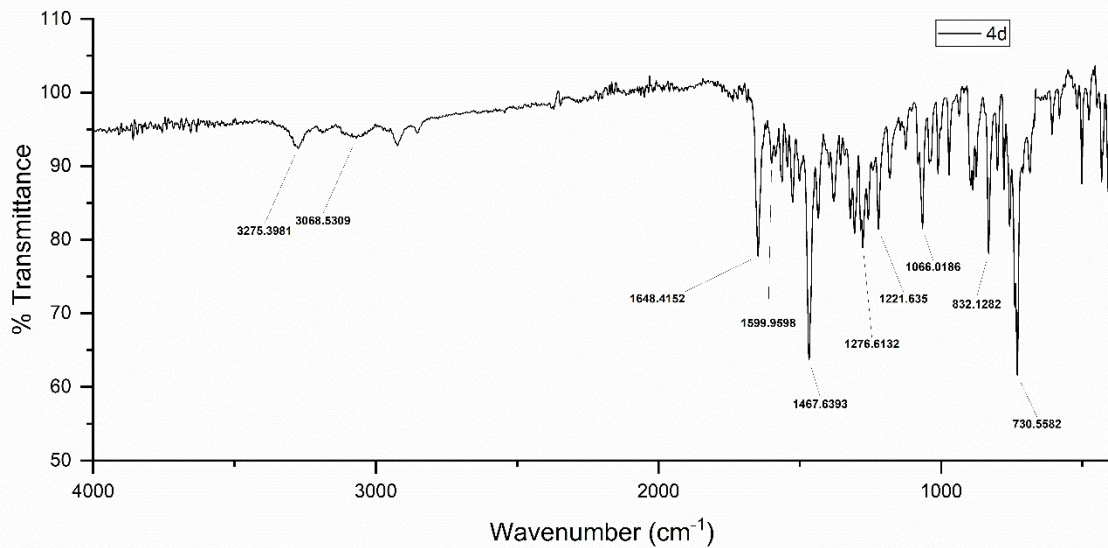



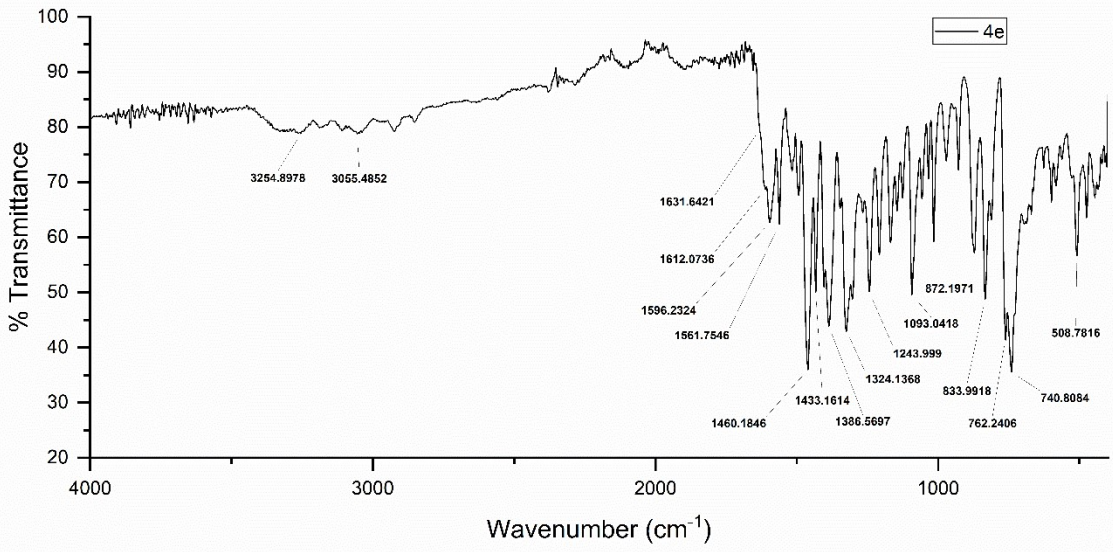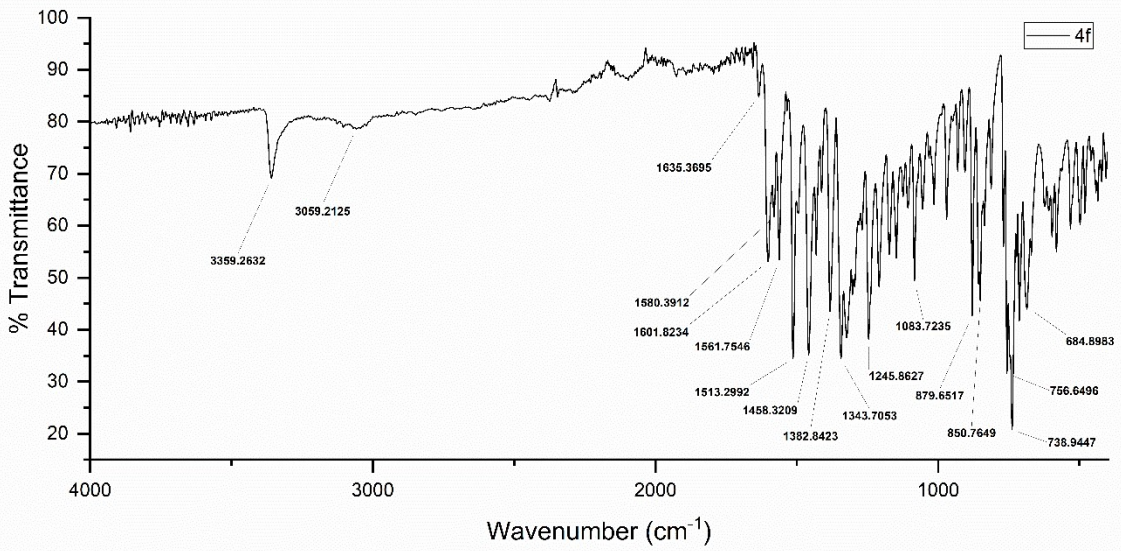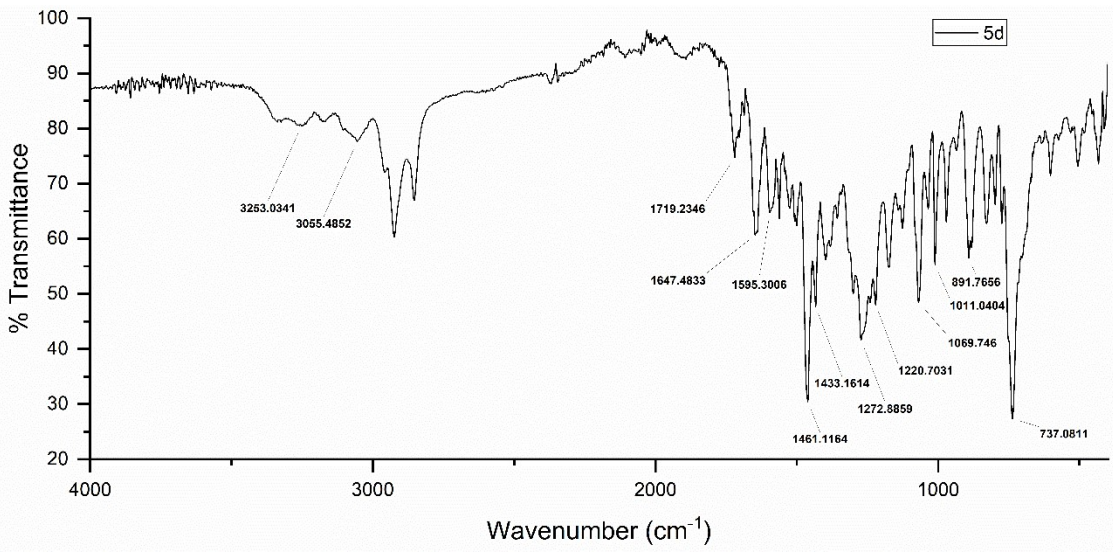

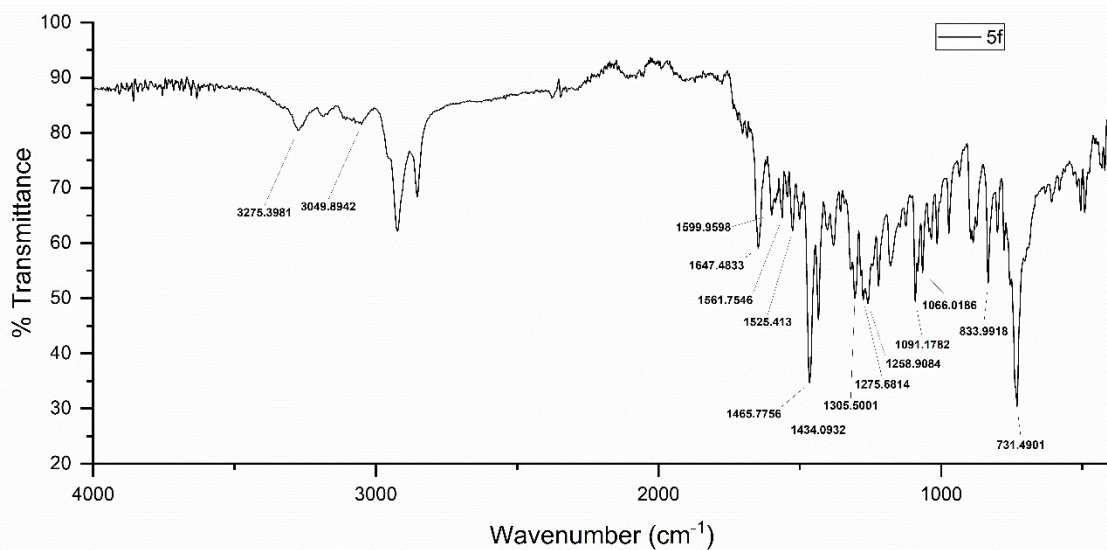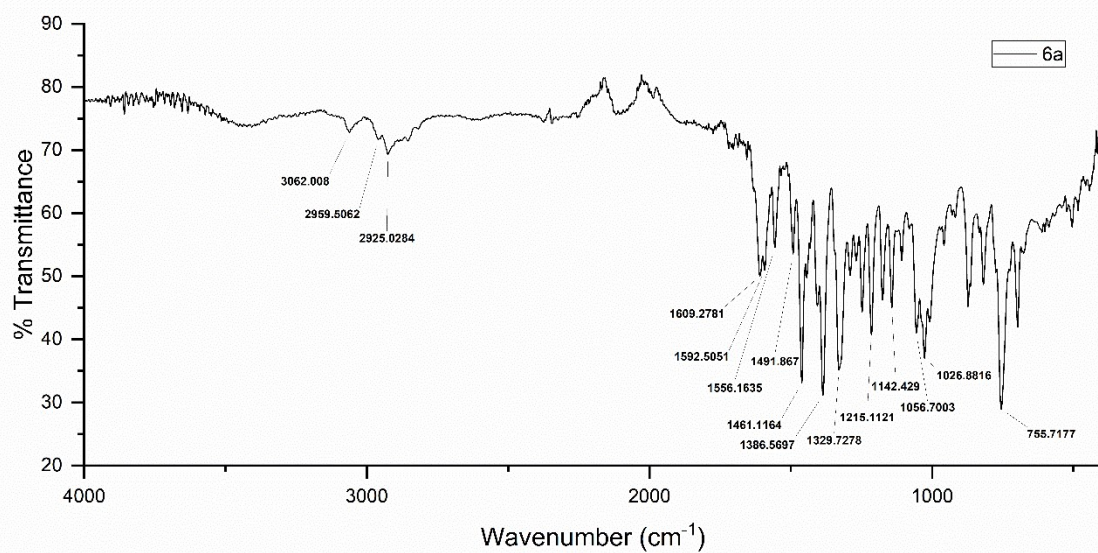



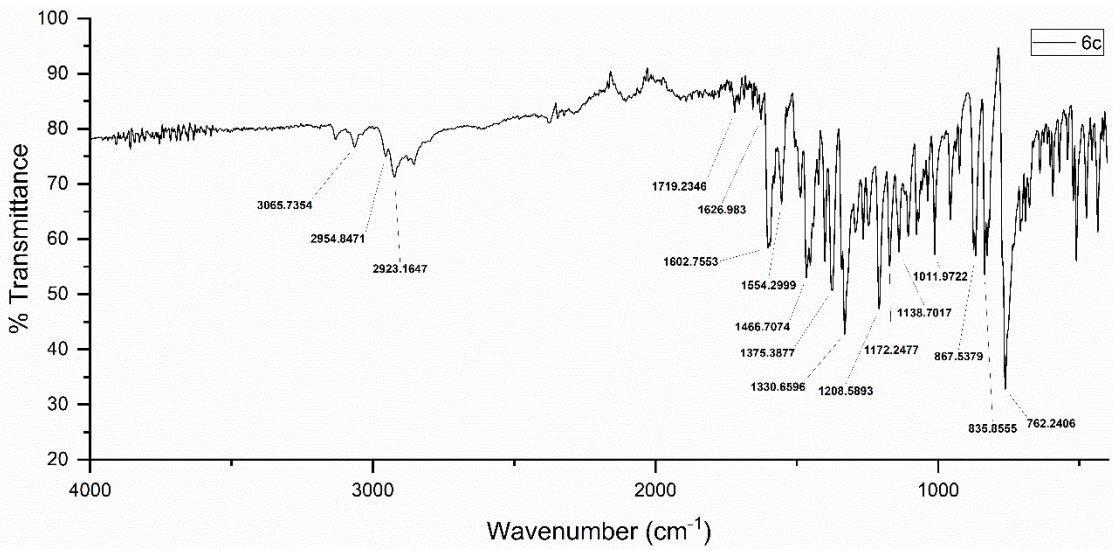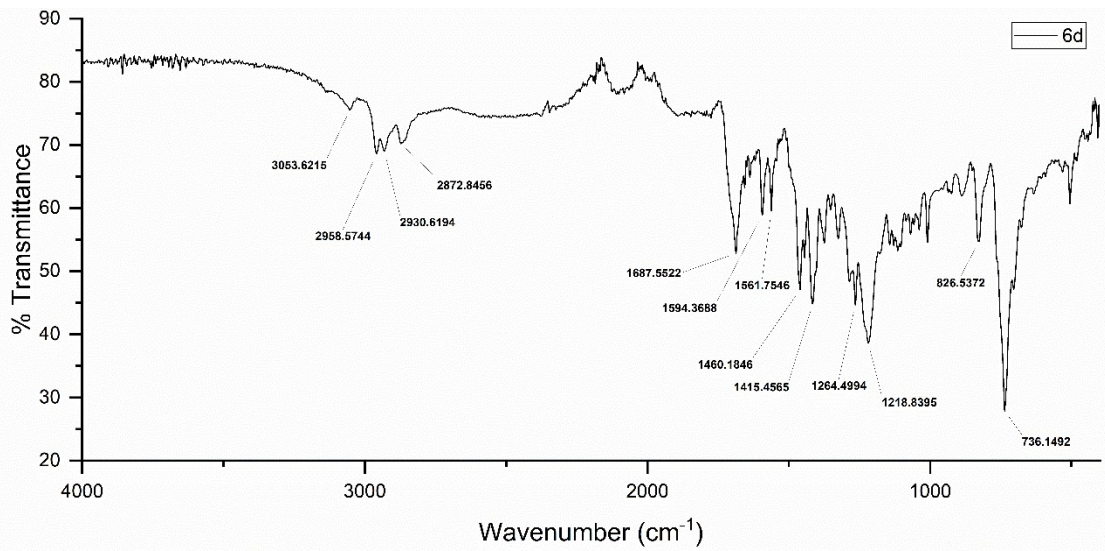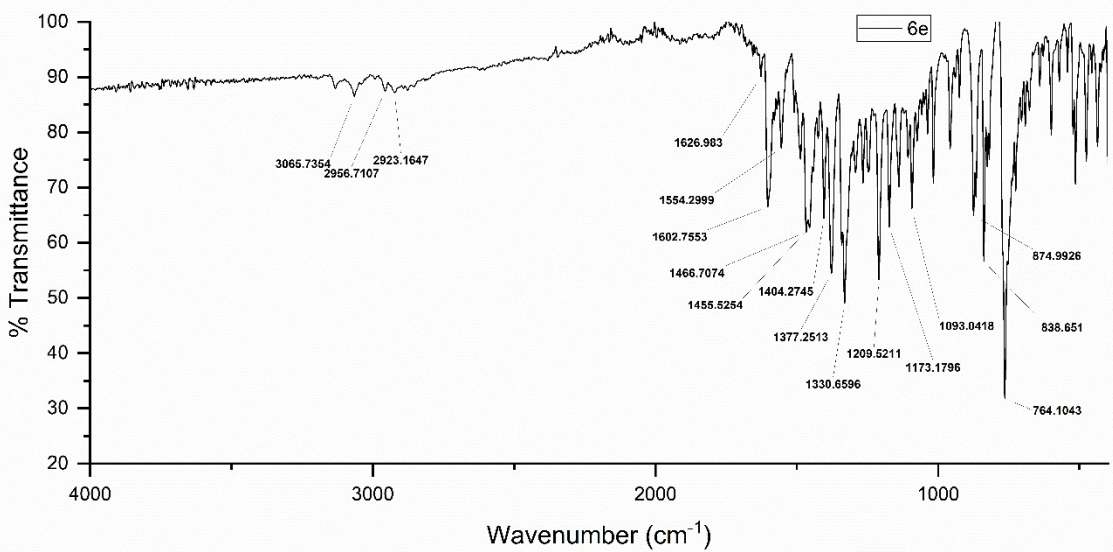

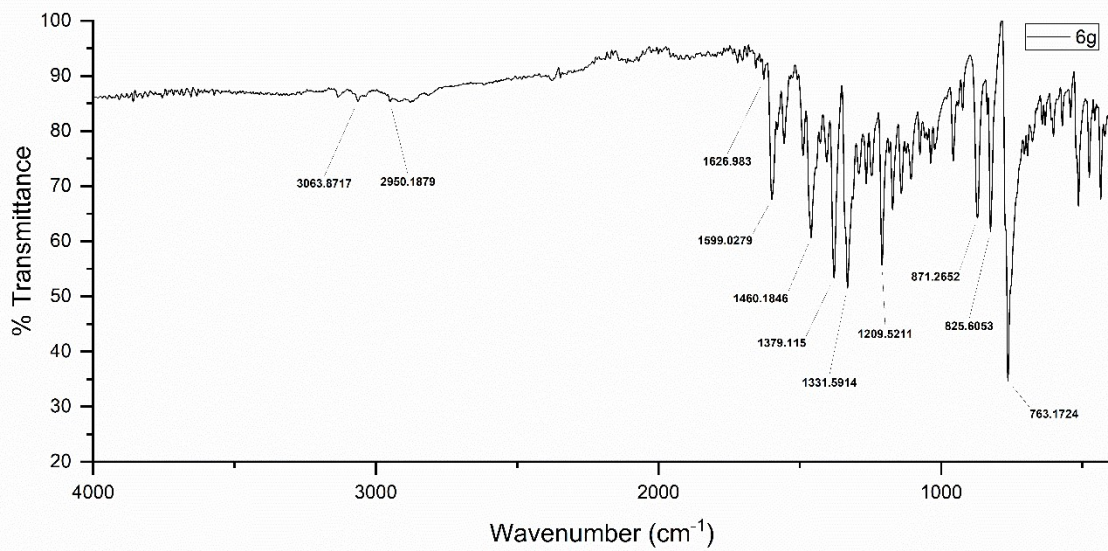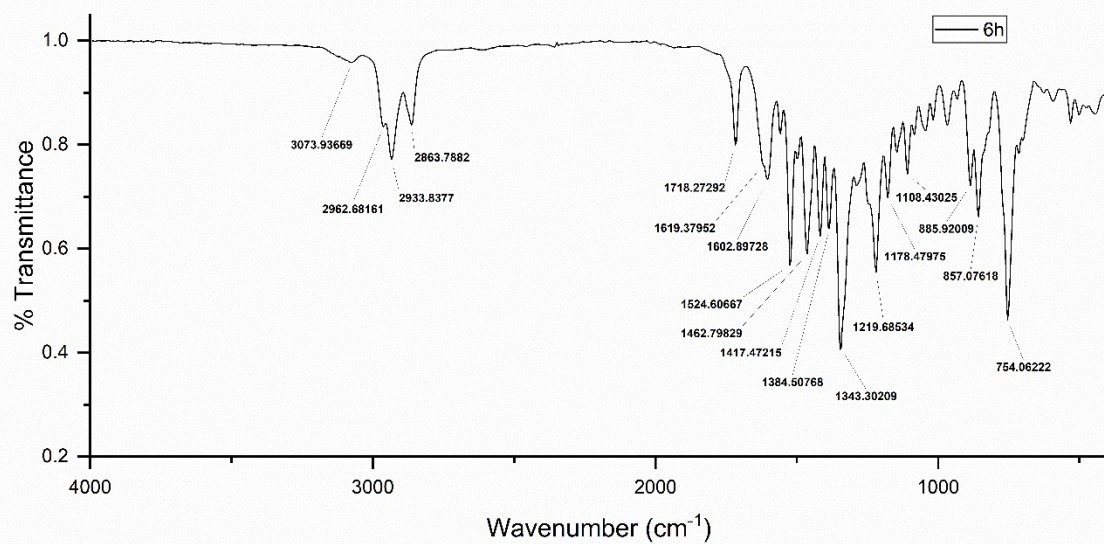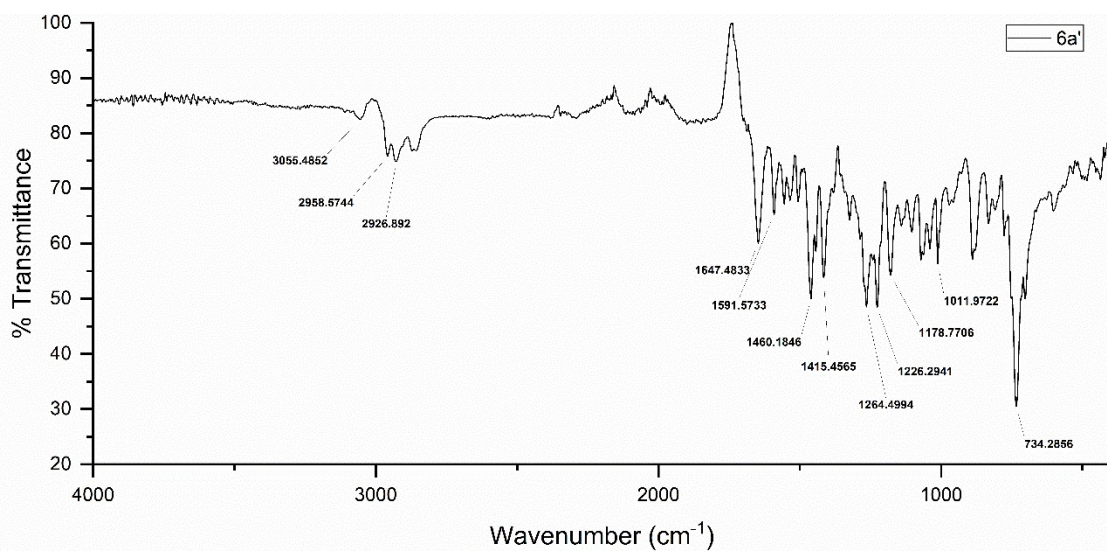



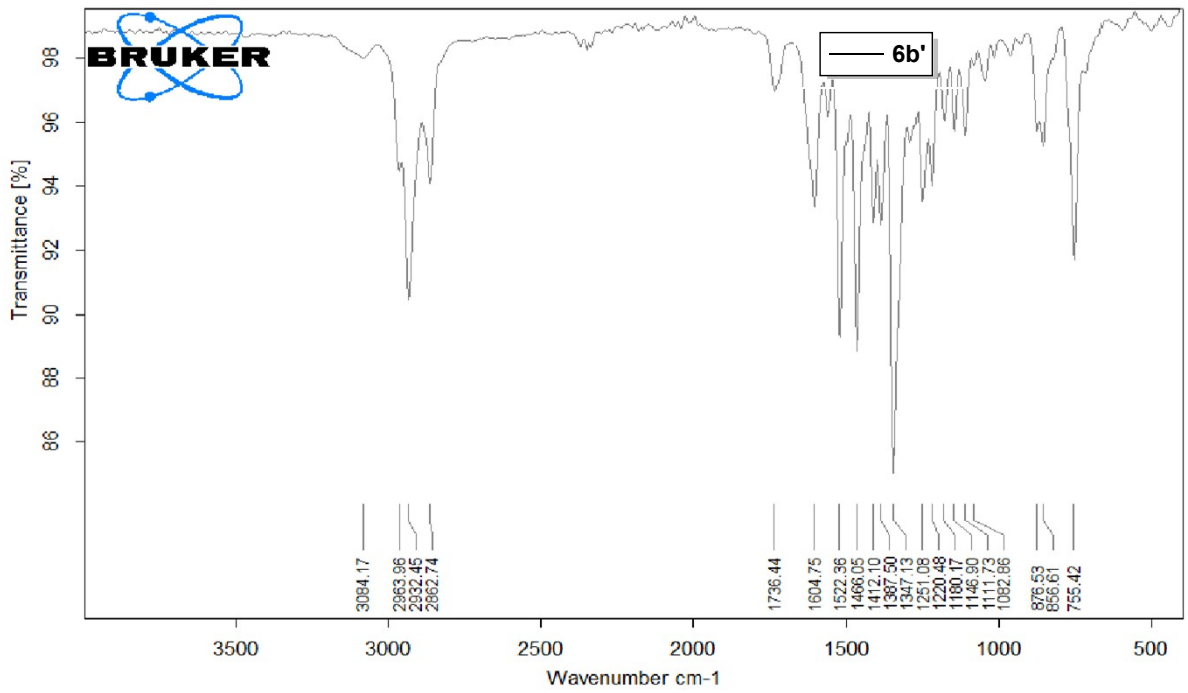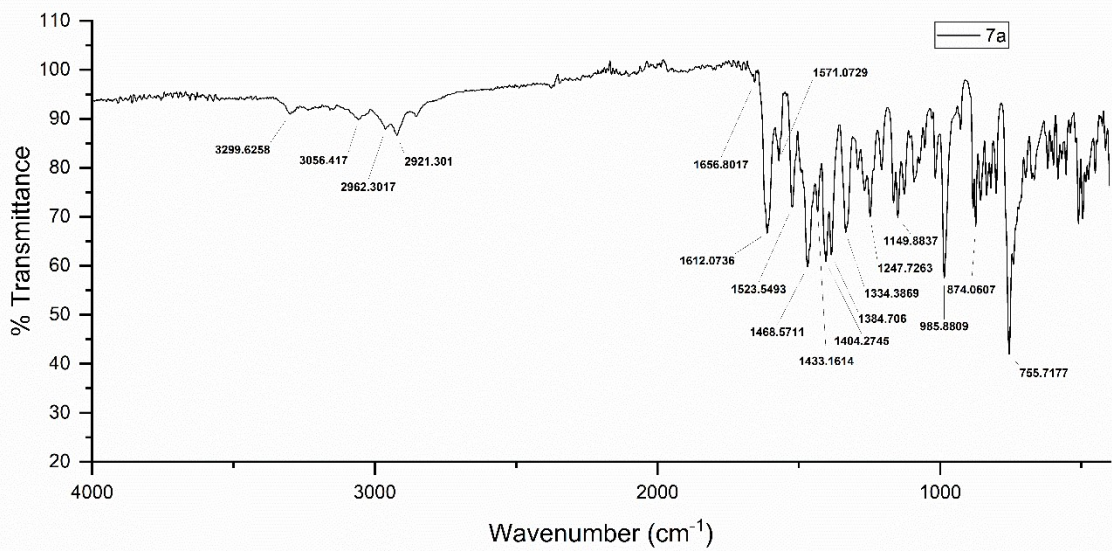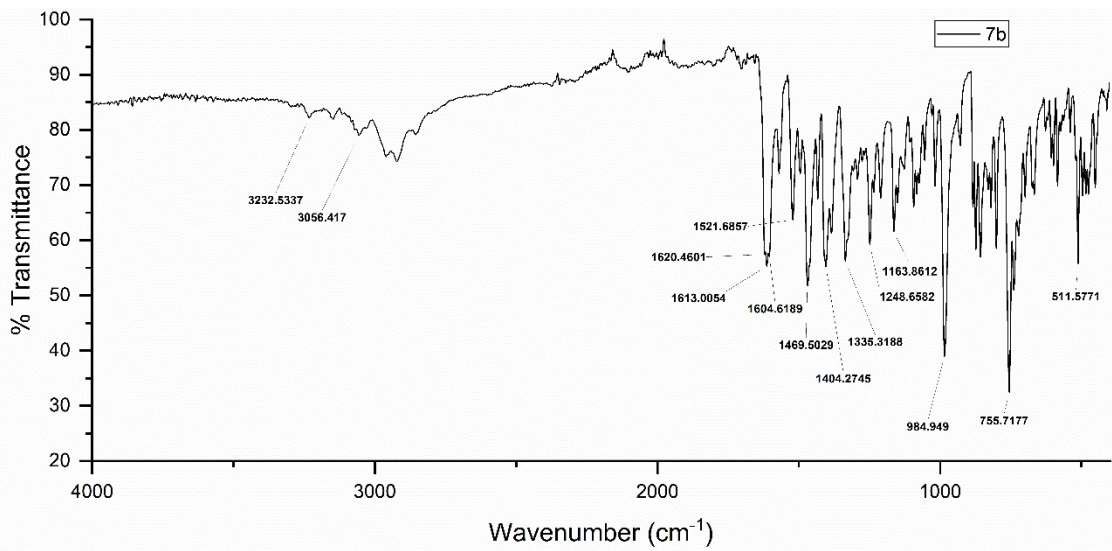

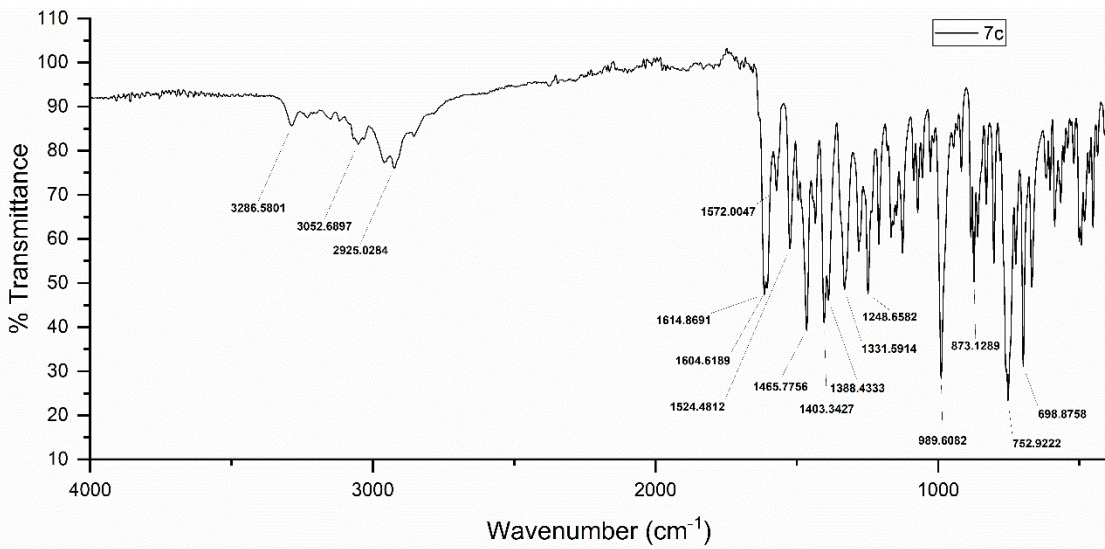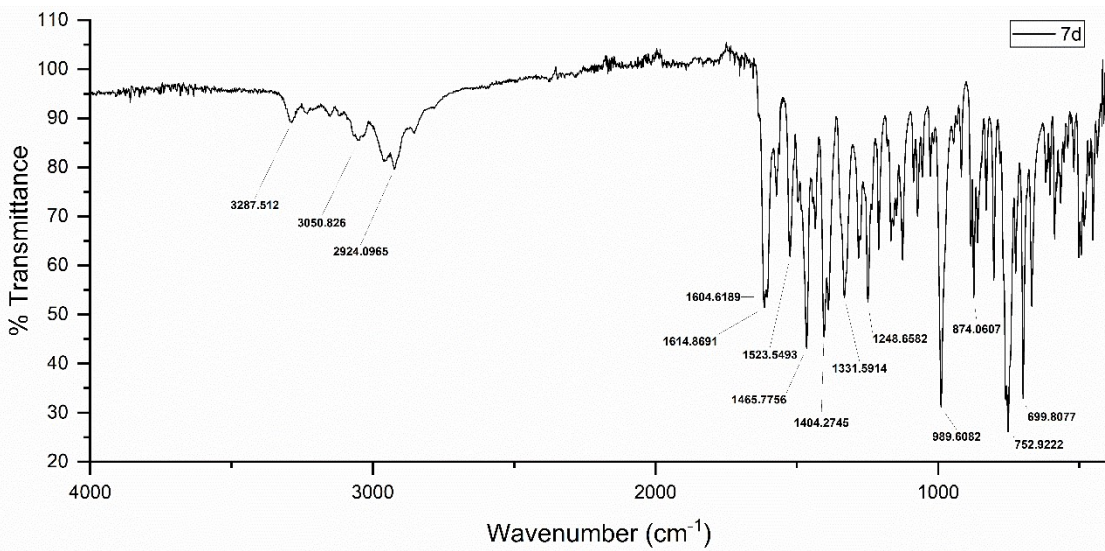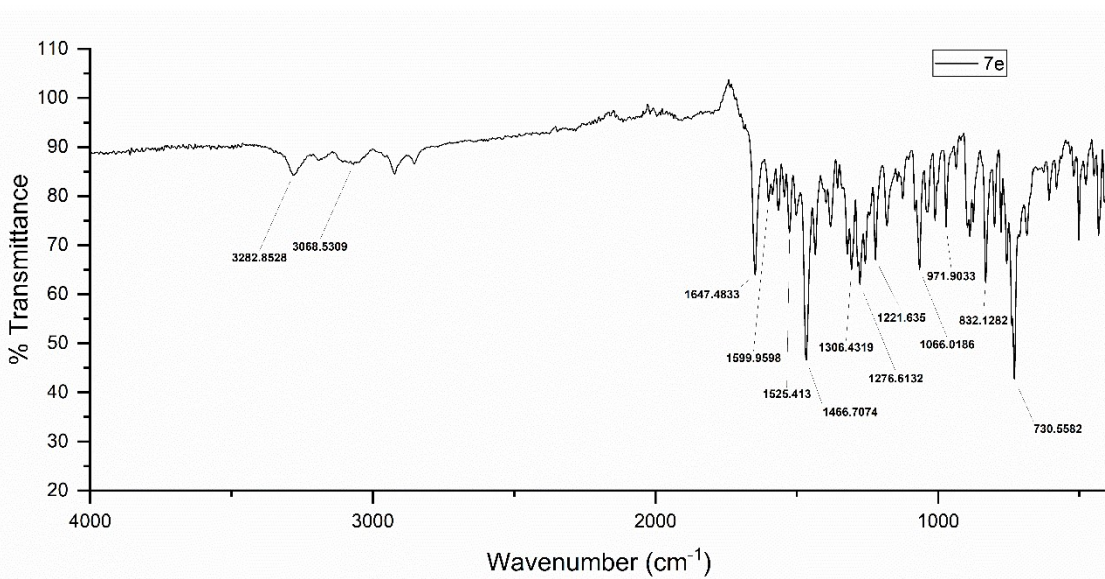

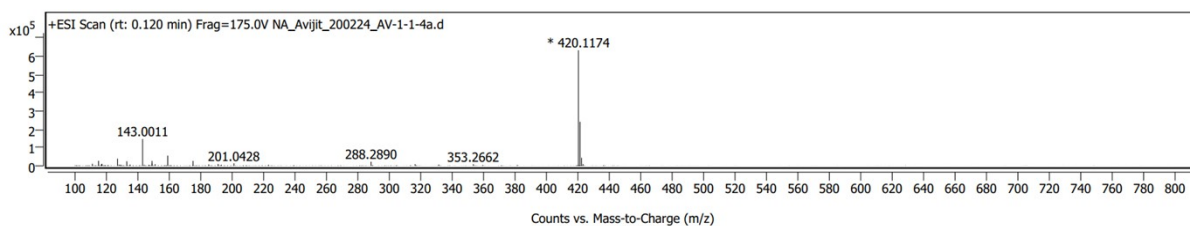

Figure S1: HRMS-ESI spectra of **4a**

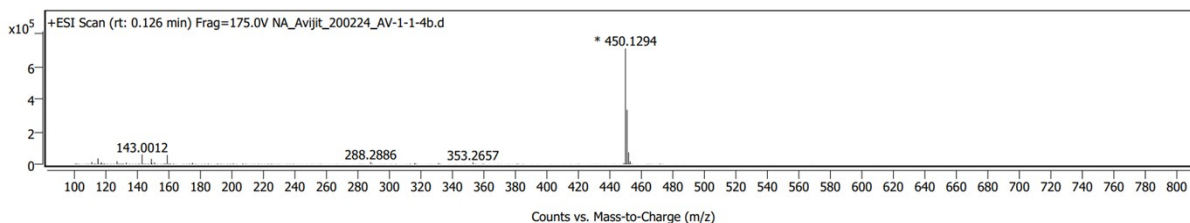

Figure S2: HRMS-ESI spectra of **4b**

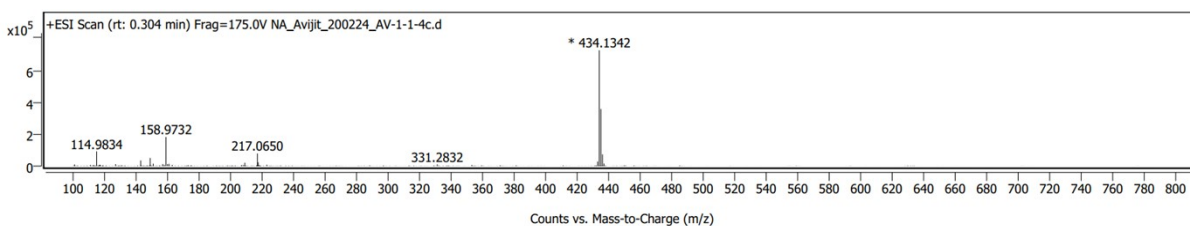

Figure S3: HRMS-ESI spectra of **4c**

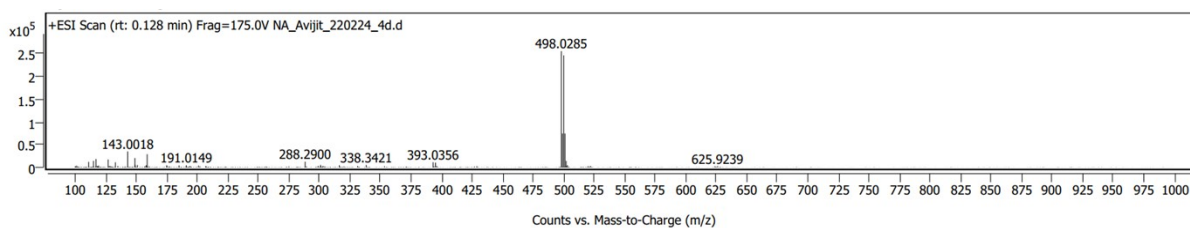

Figure S4: HRMS-ESI spectra of **4d**

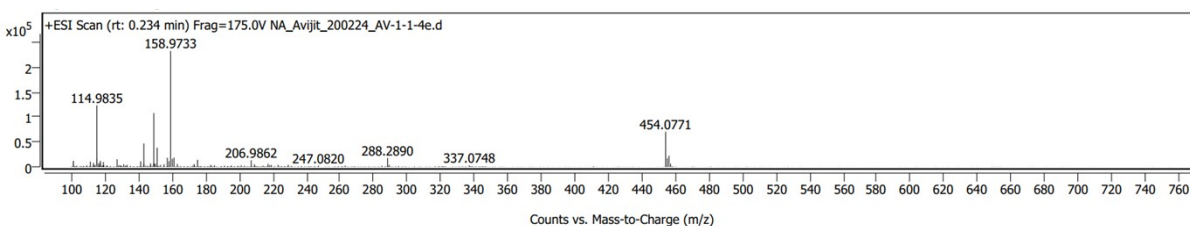

Figure S5: HRMS-ESI spectra of **4e**



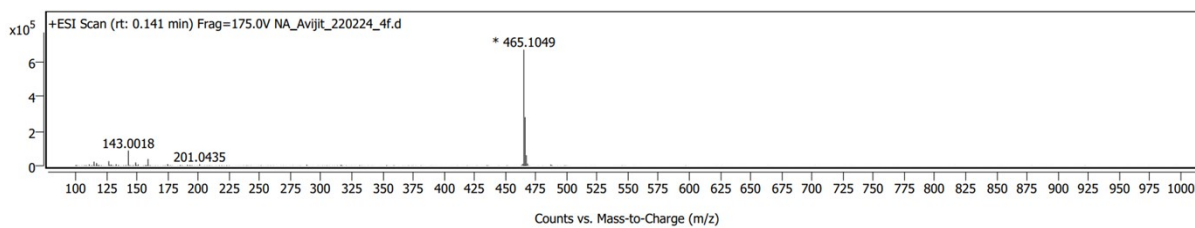

Figure S6: HRMS-ESI spectra of **4f**

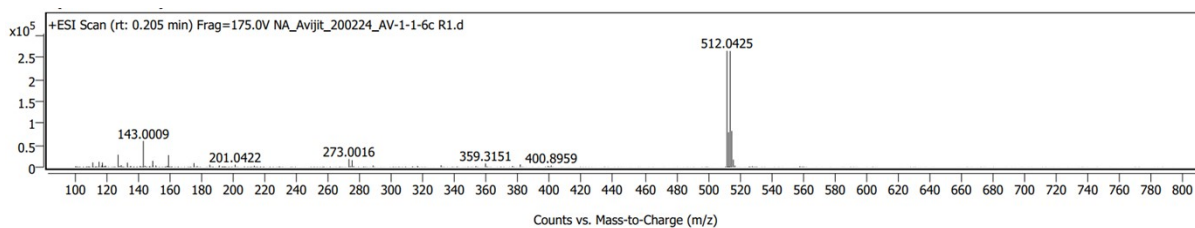

Figure S7: HRMS-ESI spectra of **6c**

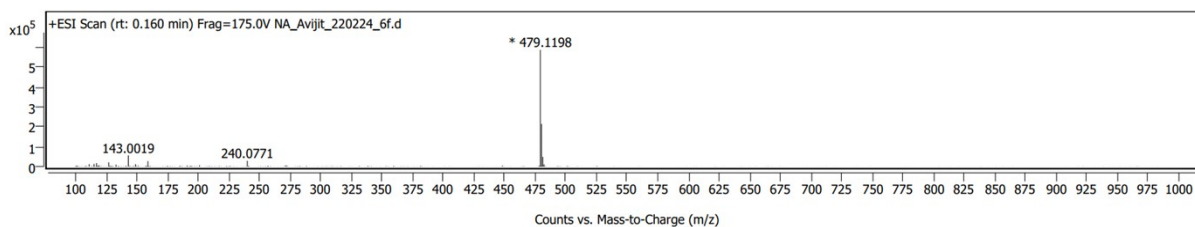

Figure S8: HRMS-ESI spectra of **6f**

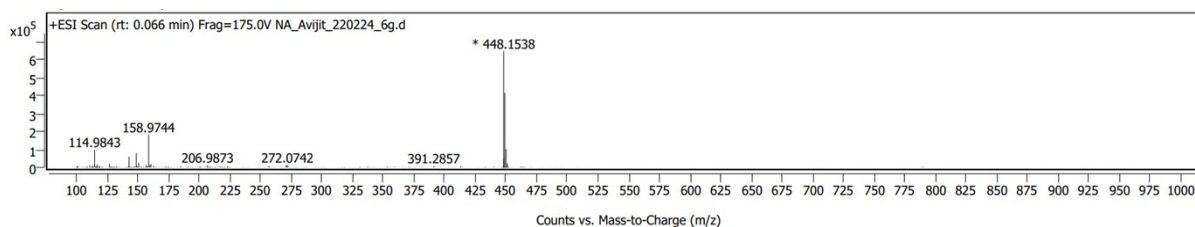

Figure S9: HRMS-ESI spectra of **6g**

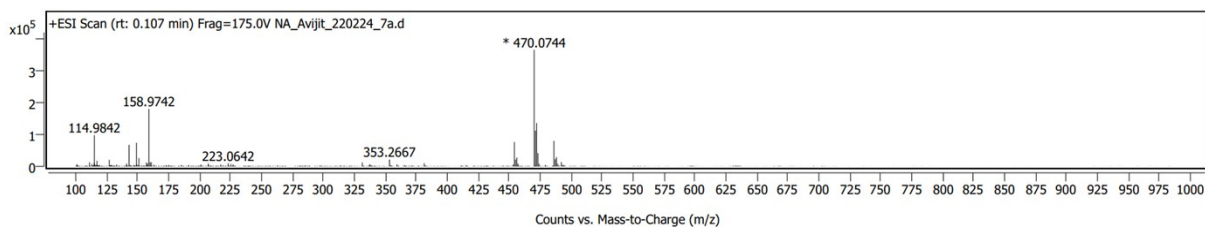

Figure S10: HRMS-ESI spectra of **7a**



**Table S1: MTT assay against MDA-MB-231 and A549**

|                               | <b>MDA-MB-231</b> |           | <b>A549</b> |           |
|-------------------------------|-------------------|-----------|-------------|-----------|
|                               | <b>6h</b>         | <b>6a</b> | <b>6h</b>   | <b>6a</b> |
| <b>IC50 <math>\mu</math>M</b> | 24.72             | 38.9      | 42.96       | 58.57     |

**Table S2: Determination of MitoSOX in MDA-MB-231 and A549**

| <b>MitoSOX</b>    | <b>Control</b> | <b>3 h</b> | <b>6 h</b> |
|-------------------|----------------|------------|------------|
| <b>MDA-MB-231</b> | 14.991         | 26.688     | 39.007     |
| <b>A549</b>       | 17.422         | 25.057     | 34.617     |

**Table S3: TMRM imaging of MDA-MB-231 and A549**

| <b>TMRM</b>       | <b>Control</b> | <b>3 h</b> | <b>6 h</b> |
|-------------------|----------------|------------|------------|
| <b>MDA-MB-231</b> | 49.023         | 33.118     | 33.768     |
| <b>A549</b>       | 43.34          | 21.782     | 22.341     |

SINGLE CRYSTAL-XRD DATA OF MOLECULE 4a

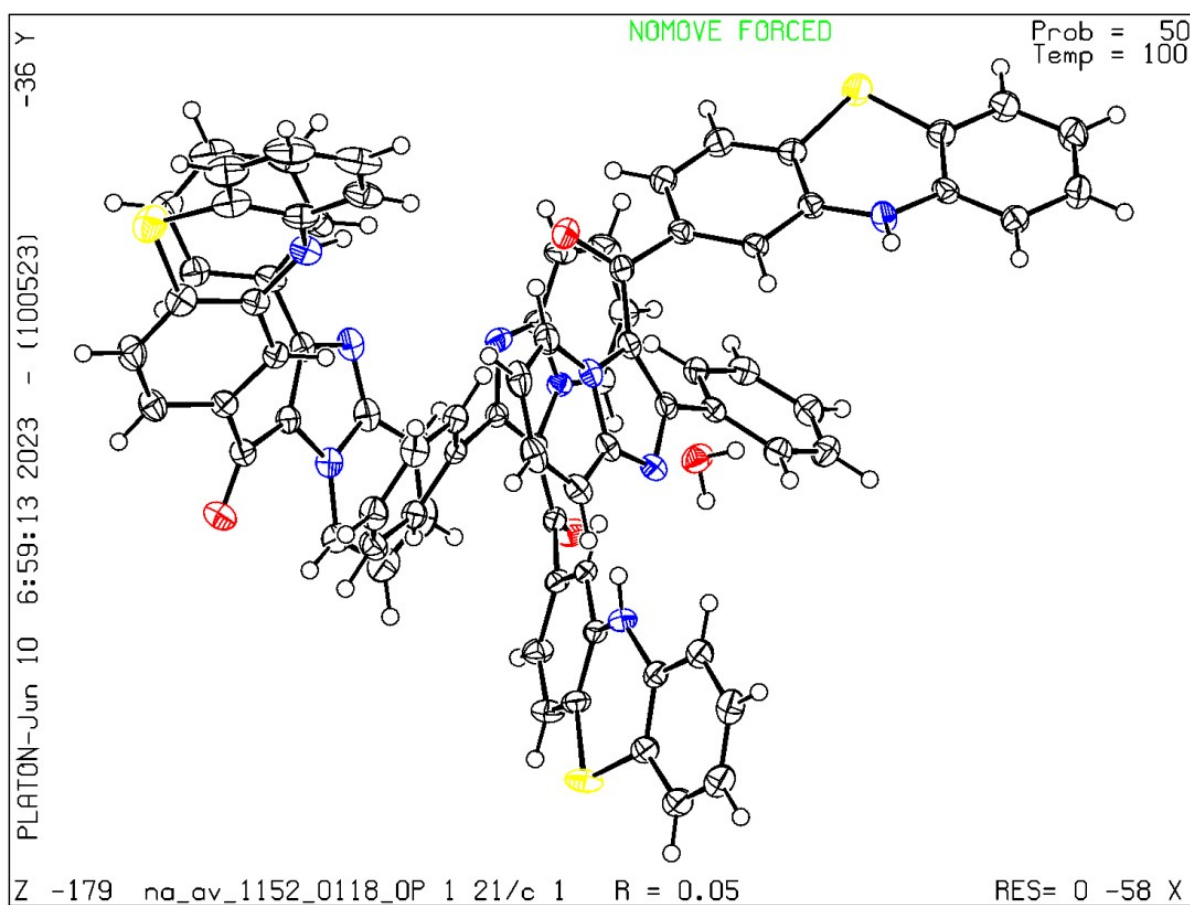

Figure 2: Ortep diagram of compound 4a (CCDC 2289193).

**Table S4: Fractional Atomic Coordinates ( $\times 10^4$ ) and Equivalent Isotropic Displacement Parameters ( $\text{\AA}^2 \times 10^3$ ) for NA\_AV\_1152\_0118\_0ma.  $U_{\text{eq}}$  is defined as 1/3 of the trace of the orthogonalised  $U_{ij}$  tensor.**

| Atom | <i>x</i>     | <i>y</i>   | <i>z</i>    | <i>U</i> (eq) |
|------|--------------|------------|-------------|---------------|
| S001 | 5684.0 (5)   | 4588.7 (2) | 1680.4 (4)  | 34.12 (14)    |
| S002 | 3683.1 (5)   | 1508.4 (2) | 6920.9 (4)  | 36.74 (15)    |
| S003 | 10755.4 (6)  | 4518.3 (2) | 8883.6 (4)  | 40.85 (16)    |
| O006 | 8267.2 (13)  | 2910.5 (5) | 2813.3 (9)  | 28.4 (3)      |
| O007 | 11520.2 (13) | 4318.3 (5) | 4779.4 (9)  | 30.3 (3)      |
| O008 | 5794.9 (13)  | 3332.1 (5) | 7305.9 (10) | 31.0 (3)      |
| N00A | 8145.1 (13)  | 2696.7 (5) | 4497.0 (10) | 19.5 (3)      |
| N00B | 8114.4 (14)  | 3105.0 (5) | 5599.3 (10) | 22.1 (4)      |
| N00C | 5007.3 (14)  | 4175.7 (5) | 3280.8 (11) | 23.4 (4)      |
| N00D | 4819.5 (14)  | 3910.0 (5) | 6203.8 (11) | 23.3 (4)      |
| N00E | 11076.9 (14) | 3478.9 (5) | 4428.7 (11) | 24.1 (4)      |
| N00F | 4383.0 (15)  | 3821.3 (5) | 4851.2 (11) | 23.9 (4)      |
| N00G | 11160.1 (15) | 2971.3 (5) | 5348.6 (12) | 27.5 (4)      |
| N00H | 2324.6 (15)  | 2215.0 (5) | 6148.2 (12) | 27.3 (4)      |
| N00I | 9235.4 (15)  | 3978.0 (6) | 7869.1 (11) | 28.2 (4)      |
| C00J | 8054.3 (16)  | 3091.1 (6) | 4193.2 (12) | 19.3 (4)      |
| C00K | 8149.2 (16)  | 2720.7 (6) | 5350.4 (12) | 21.5 (4)      |
| C00L | 7950.2 (16)  | 3161.8 (6) | 3301.6 (12) | 20.7 (4)      |
| C00M | 7412.6 (17)  | 3534.8 (6) | 2968.5 (12) | 21.2 (4)      |
| C00N | 5920.6 (17)  | 4017.7 (6) | 2923.2 (12) | 20.8 (4)      |
| C00O | 6481.7 (16)  | 3695.6 (6) | 3302.9 (12) | 19.7 (4)      |
| C00P | 8028.5 (16)  | 3776.3 (6) | 4978.3 (12) | 19.9 (4)      |
| C00Q | 4579.8 (16)  | 3089.9 (6) | 4691.6 (12) | 21.2 (4)      |
| C00R | 8585.1 (17)  | 4028.0 (6) | 4454.3 (13) | 23.1 (4)      |
| C00S | 4192.8 (18)  | 4400.3 (6) | 2855.5 (13) | 23.3 (4)      |
| C00T | 1894.5 (18)  | 1831.4 (6) | 6012.7 (13) | 24.0 (4)      |
| C00U | 8054.4 (16)  | 3333.3 (6) | 4898.9 (12) | 19.1 (4)      |
| C00V | 10991.1 (17) | 4243.6 (6) | 6165.3 (13) | 23.2 (4)      |
| C00W | 4610.1 (16)  | 3457.5 (6) | 5203.7 (13) | 22.0 (4)      |
| C00X | 7473.3 (17)  | 3949.3 (6) | 5624.7 (13) | 23.4 (4)      |
| C00Y | 3797.7 (17)  | 2688.6 (6) | 6351.9 (12) | 21.7 (4)      |
| C00Z | 11250.3 (17) | 4091.1 (6) | 5333.7 (13) | 23.4 (4)      |
| C010 | 11207.1 (17) | 3654.3 (6) | 5212.8 (13) | 22.3 (4)      |
| C011 | 4503.2 (17)  | 4093.0 (6) | 5463.4 (13) | 24.1 (4)      |
| C012 | 11270.5 (17) | 3326.5 (6) | 5758.8 (13) | 23.2 (4)      |
| C013 | 5215.9 (17)  | 3213.3 (7) | 6701.0 (13) | 23.4 (4)      |
| C014 | 6316.4 (19)  | 4173.0 (6) | 2189.3 (12) | 25.5 (4)      |
| C015 | 10157.8 (17) | 4070.6 (6) | 6600.6 (12) | 21.9 (4)      |
| C016 | 8159.4 (17)  | 2331.3 (6) | 4095.0 (13) | 24.5 (4)      |
| C017 | 3414.4 (17)  | 2297.7 (6) | 6392.3 (13) | 23.2 (4)      |

|             |              |            |             |          |
|-------------|--------------|------------|-------------|----------|
| <b>C018</b> | 4858.4 (17)  | 2788.8 (6) | 6652.6 (12) | 22.8 (4) |
| <b>C019</b> | 11030.8 (17) | 3069.2 (6) | 4543.5 (14) | 26.6 (5) |
| <b>C01A</b> | 8134.1 (18)  | 2364.4 (7) | 5820.1 (14) | 28.5 (5) |
| <b>C01B</b> | 5357.9 (17)  | 2785.8 (6) | 4814.5 (13) | 24.2 (4) |
| <b>C01C</b> | 4873.4 (17)  | 3495.9 (6) | 6049.7 (13) | 22.6 (4) |
| <b>C01D</b> | 4381.6 (19)  | 4593.7 (6) | 2106.8 (13) | 25.9 (5) |
| <b>C01E</b> | 8758.4 (19)  | 4153.2 (7) | 8541.7 (13) | 29.4 (5) |
| <b>C01F</b> | 11472.9 (18) | 3332.0 (6) | 6663.9 (13) | 25.7 (4) |
| <b>C01G</b> | 10027.2 (18) | 4170.1 (6) | 7424.7 (13) | 24.1 (4) |
| <b>C01H</b> | 5273.8 (19)  | 2431.1 (7) | 4367.3 (13) | 28.3 (5) |
| <b>C01I</b> | 7245 (2)     | 4011.8 (7) | 1857.6 (13) | 29.7 (5) |
| <b>C01J</b> | 8585.8 (19)  | 4441.6 (7) | 4570.7 (14) | 29.2 (5) |
| <b>C01K</b> | 7473.1 (18)  | 4363.5 (7) | 5735.7 (14) | 28.6 (5) |
| <b>C01L</b> | 3171.2 (18)  | 4445.5 (6) | 3194.8 (14) | 26.5 (5) |
| <b>C01M</b> | 4137.8 (18)  | 1998.8 (6) | 6712.6 (14) | 26.8 (5) |
| <b>C01N</b> | 882.5 (18)   | 1784.4 (7) | 5581.8 (13) | 26.8 (5) |
| <b>C01O</b> | 2431.2 (18)  | 1486.4 (7) | 6320.7 (14) | 27.5 (5) |
| <b>C01P</b> | 5211.9 (19)  | 2095.1 (7) | 6955.8 (14) | 30.3 (5) |
| <b>C01Q</b> | 8104.5 (19)  | 2005.6 (7) | 5419.5 (15) | 31.8 (5) |
| <b>C01R</b> | 10978.4 (18) | 3648.2 (7) | 3650.4 (13) | 28.5 (5) |
| <b>C01S</b> | 3737.7 (18)  | 3037.9 (7) | 4081.6 (13) | 26.4 (5) |
| <b>C01T</b> | 11638.1 (19) | 4549.3 (7) | 6526.8 (14) | 29.9 (5) |
| <b>C01U</b> | 4961.7 (19)  | 4126.7 (7) | 6927.5 (14) | 29.1 (5) |
| <b>C01V</b> | 8029.4 (19)  | 4611.3 (7) | 5212.4 (15) | 30.8 (5) |
| <b>C01W</b> | 12339.0 (18) | 3551.0 (7) | 7027.6 (14) | 28.8 (5) |
| <b>C01X</b> | 4354.6 (18)  | 4513.2 (7) | 5437.9 (14) | 28.5 (5) |
| <b>C01Y</b> | 7799.0 (18)  | 3694.8 (7) | 2243.6 (13) | 26.6 (5) |
| <b>C01Z</b> | 5571.1 (18)  | 2488.9 (7) | 6952.7 (13) | 26.8 (5) |
| <b>C020</b> | 8132.1 (19)  | 1990.0 (7) | 4548.5 (15) | 29.8 (5) |
| <b>C021</b> | 2366 (2)     | 4687.1 (7) | 2806.7 (15) | 32.6 (5) |
| <b>C022</b> | 412 (2)      | 1407.5 (7) | 5478.4 (15) | 32.3 (5) |
| <b>C023</b> | 3554 (2)     | 4824.9 (6) | 1711.0 (15) | 31.3 (5) |
| <b>C024</b> | 1949 (2)     | 1110.9 (7) | 6217.6 (15) | 32.7 (5) |
| <b>C025</b> | 3656.9 (19)  | 2679.6 (7) | 3633.7 (14) | 30.6 (5) |
| <b>C026</b> | 4506.4 (19)  | 4727.2 (7) | 6155.3 (15) | 31.4 (5) |
| <b>C027</b> | 10811.3 (19) | 3403.0 (8) | 2986.9 (15) | 34.6 (5) |
| <b>C028</b> | 2555 (2)     | 4875.5 (7) | 2066.0 (15) | 35.0 (6) |
| <b>C029</b> | 932 (2)      | 1069.6 (7) | 5800.8 (15) | 34.8 (5) |
| <b>C02A</b> | 4414.9 (19)  | 2375.4 (7) | 3786.7 (14) | 30.5 (5) |
| <b>C02B</b> | 10759 (2)    | 3129.6 (7) | 7165.5 (15) | 32.4 (5) |
| <b>C02C</b> | 4801 (2)     | 4530.4 (7) | 6905.0 (15) | 33.6 (5) |
| <b>C02D</b> | 10741.7 (19) | 4455.2 (7) | 7798.7 (14) | 30.0 (5) |
| <b>C02E</b> | 11507 (2)    | 4651.6 (7) | 7346.0 (15) | 34.2 (5) |
| <b>C02F</b> | 7686 (2)     | 4062.7 (8) | 8719.4 (15) | 35.8 (6) |
| <b>C02G</b> | 9359 (2)     | 4423.6 (7) | 9049.0 (14) | 34.6 (5) |
| <b>C02H</b> | 10880 (2)    | 2816.1 (7) | 3853.5 (16) | 34.6 (5) |
| <b>C02I</b> | 10770 (2)    | 2981.3 (8) | 3084.6 (16) | 38.8 (6) |
| <b>C02J</b> | 12491 (2)    | 3569.6 (8) | 7884.7 (15) | 38.3 (6) |

|             |             |            |             |          |
|-------------|-------------|------------|-------------|----------|
| <b>C02K</b> | 10898 (2)   | 3160.8 (8) | 8012.4 (16) | 40.2 (6) |
| <b>C02L</b> | 7210 (2)    | 4239.8 (9) | 9389.9 (17) | 44.7 (7) |
| <b>C02M</b> | 8860 (2)    | 4609.2 (8) | 9706.1 (15) | 42.7 (6) |
| <b>C02N</b> | 7793 (3)    | 4516.4 (9) | 9871.5 (16) | 46.5 (7) |
| <b>C02O</b> | 11764 (2)   | 3378.0 (9) | 8376.2 (16) | 42.9 (6) |
| <b>O1</b>   | 8093.6 (13) | 1761.0 (5) | 2344.1 (9)  | 31.7 (4) |

**Table S5: Anisotropic Displacement Parameters ( $\text{\AA}^2 \times 10^3$ ) for NA\_AV\_1152\_0118\_0ma. The Anisotropic displacement factor exponent takes the form: -  $2\pi^2[h^2a^{*2}U_{11}+2hka^*b^*U_{12}+\dots]$ .**

| <b>Atom</b> | <b>U<sub>11</sub></b> | <b>U<sub>22</sub></b> | <b>U<sub>33</sub></b> | <b>U<sub>23</sub></b> | <b>U<sub>13</sub></b> | <b>U<sub>12</sub></b> |
|-------------|-----------------------|-----------------------|-----------------------|-----------------------|-----------------------|-----------------------|
| <b>S001</b> | 44.3 (4)              | 28.2 (3)              | 30.2 (3)              | 13.1 (2)              | 5.5 (2)               | 7.6 (3)               |
| <b>S002</b> | 38.8 (3)              | 20.8 (3)              | 48.7 (4)              | 7.8 (2)               | -15.6 (3)             | 0.0 (2)               |
| <b>S003</b> | 43.5 (4)              | 50.6 (4)              | 28.6 (3)              | -13.4 (3)             | 2.9 (3)               | -1.0 (3)              |
| <b>O006</b> | 36.7 (9)              | 27.4 (8)              | 21.1 (7)              | -3.3 (6)              | 1.0 (6)               | 4.5 (7)               |
| <b>O007</b> | 37.7 (9)              | 24.0 (8)              | 30.1 (8)              | 2.1 (6)               | 9.0 (7)               | -1.2 (7)              |
| <b>O008</b> | 28.3 (8)              | 33.1 (9)              | 31.0 (8)              | -0.3 (7)              | -4.8 (6)              | -2.9 (7)              |
| <b>N00A</b> | 19.3 (8)              | 18.2 (8)              | 20.8 (8)              | 1.4 (6)               | 0.8 (6)               | 2.2 (7)               |
| <b>N00B</b> | 21.6 (9)              | 24.3 (9)              | 20.1 (8)              | 2.6 (7)               | -0.7 (7)              | 2.8 (7)               |
| <b>N00C</b> | 26.0 (9)              | 23.1 (9)              | 20.8 (8)              | 3.7 (7)               | -0.3 (7)              | 3.0 (7)               |
| <b>N00D</b> | 21.5 (9)              | 21.4 (9)              | 27.0 (9)              | -1.0 (7)              | 3.2 (7)               | -5.0 (7)              |
| <b>N00E</b> | 22.8 (9)              | 22.9 (9)              | 26.8 (9)              | -4.4 (7)              | 3.0 (7)               | 2.5 (7)               |
| <b>N00F</b> | 24.9 (9)              | 20.0 (9)              | 27.0 (9)              | 2.4 (7)               | 4.0 (7)               | -1.5 (7)              |
| <b>N00G</b> | 22.1 (9)              | 21.7 (9)              | 38.7 (10)             | -2.4 (8)              | 2.0 (8)               | 1.7 (7)               |
| <b>N00H</b> | 20.5 (9)              | 17.7 (9)              | 43.4 (11)             | 3.8 (8)               | -2.9 (8)              | 2.0 (7)               |
| <b>N00I</b> | 29.3 (10)             | 26.6 (10)             | 29.2 (10)             | -0.3 (7)              | 6.5 (8)               | 3.9 (8)               |
| <b>C00J</b> | 19.1 (10)             | 17.1 (9)              | 21.4 (9)              | 1.3 (7)               | -0.5 (7)              | 1.6 (8)               |
| <b>C00K</b> | 19.3 (10)             | 24.4 (11)             | 21.0 (10)             | 2.6 (8)               | 1.7 (8)               | 3.3 (8)               |
| <b>C00L</b> | 19.5 (10)             | 22.0 (10)             | 20.4 (9)              | -1.4 (8)              | -0.7 (7)              | -1.5 (8)              |
| <b>C00M</b> | 24.1 (10)             | 22.1 (10)             | 17.0 (9)              | 0.6 (7)               | -2.7 (7)              | -1.2 (8)              |
| <b>C00N</b> | 25.1 (10)             | 18.6 (10)             | 18.4 (9)              | 0.7 (7)               | -2.4 (8)              | -3.2 (8)              |
| <b>C00O</b> | 21.3 (10)             | 20.7 (10)             | 16.7 (9)              | 1.0 (7)               | -2.2 (7)              | -3.2 (8)              |
| <b>C00P</b> | 18.6 (10)             | 19.5 (10)             | 21.0 (9)              | -1.2 (7)              | -4.2 (7)              | -0.1 (8)              |
| <b>C00Q</b> | 19.5 (10)             | 21.3 (10)             | 23.3 (10)             | 1.7 (8)               | 4.9 (8)               | -1.8 (8)              |
| <b>C00R</b> | 20.4 (10)             | 24.3 (11)             | 24.6 (10)             | -1.9 (8)              | 0.9 (8)               | 0.3 (8)               |
| <b>C00S</b> | 27.3 (11)             | 15.5 (10)             | 26.2 (10)             | -1.3 (8)              | -7.0 (8)              | 0.4 (8)               |
| <b>C00T</b> | 25.3 (11)             | 19.0 (10)             | 28.0 (11)             | 3.7 (8)               | 2.3 (8)               | -0.3 (8)              |
| <b>C00U</b> | 15.4 (9)              | 21.9 (10)             | 19.9 (9)              | 0.2 (7)               | 0.4 (7)               | 0.8 (8)               |
| <b>C00V</b> | 25.4 (11)             | 18.1 (10)             | 25.9 (10)             | -0.6 (8)              | 1.3 (8)               | 2.6 (8)               |
| <b>C00W</b> | 15.8 (9)              | 23.2 (10)             | 27.1 (10)             | 1.7 (8)               | 2.7 (8)               | -3.1 (8)              |
| <b>C00X</b> | 20.4 (10)             | 24.9 (11)             | 24.9 (10)             | -1.9 (8)              | 0.1 (8)               | 0.4 (8)               |
| <b>C00Y</b> | 18.8 (10)             | 22.1 (10)             | 24.3 (10)             | 4.3 (8)               | 2.2 (8)               | 2.3 (8)               |
| <b>C00Z</b> | 21.7 (10)             | 20.7 (10)             | 27.8 (11)             | 0.4 (8)               | 1.9 (8)               | 1.1 (8)               |
| <b>C010</b> | 20.0 (10)             | 22.7 (10)             | 24.4 (10)             | -1.7 (8)              | 2.1 (8)               | -0.2 (8)              |
| <b>C011</b> | 19.8 (10)             | 21.8 (11)             | 31.2 (11)             | 1.6 (8)               | 5.8 (8)               | -4.0 (8)              |
| <b>C012</b> | 17.8 (10)             | 20.2 (10)             | 31.7 (11)             | -0.9 (8)              | 2.7 (8)               | 2.1 (8)               |



|             |           |           |           |           |           |           |
|-------------|-----------|-----------|-----------|-----------|-----------|-----------|
| <b>C013</b> | 16.9 (10) | 28.2 (11) | 25.2 (10) | 1.2 (8)   | 2.2 (8)   | -1.5 (8)  |
| <b>C014</b> | 32.0 (12) | 23.6 (11) | 20.3 (10) | 4.8 (8)   | -2.4 (8)  | 0.5 (9)   |
| <b>C015</b> | 21.7 (10) | 18.7 (10) | 24.9 (10) | -1.3 (8)  | -1.4 (8)  | 3.2 (8)   |
| <b>C016</b> | 24.3 (11) | 21.4 (10) | 27.4 (11) | -1.5 (8)  | -0.8 (8)  | 2.7 (8)   |
| <b>C017</b> | 21.1 (10) | 21.1 (10) | 27.4 (10) | 3.8 (8)   | 0.4 (8)   | 1.6 (8)   |
| <b>C018</b> | 21.4 (10) | 24.9 (11) | 22.5 (10) | 3.0 (8)   | 4.5 (8)   | 0.0 (8)   |
| <b>C019</b> | 20.5 (10) | 22.7 (11) | 36.7 (12) | -4.9 (9)  | 3.5 (9)   | 1.6 (8)   |
| <b>C01A</b> | 26.9 (11) | 31.3 (12) | 27.6 (11) | 9.6 (9)   | 3.8 (9)   | 6.9 (9)   |
| <b>C01B</b> | 19.8 (10) | 26.5 (11) | 26.3 (10) | 2.5 (8)   | 0.6 (8)   | -1.0 (8)  |
| <b>C01C</b> | 19.4 (10) | 20.5 (10) | 27.8 (10) | 0.7 (8)   | 2.0 (8)   | -3.4 (8)  |
| <b>C01D</b> | 35.0 (12) | 15.6 (10) | 26.6 (11) | -0.6 (8)  | -4.6 (9)  | 0.6 (9)   |
| <b>C01E</b> | 34.7 (13) | 27.6 (12) | 26.4 (11) | 6.3 (9)   | 6.8 (9)   | 13.4 (10) |
| <b>C01F</b> | 23.9 (11) | 22.1 (11) | 31.6 (11) | 5.7 (8)   | 5.3 (9)   | 8.6 (9)   |
| <b>C01G</b> | 23.6 (10) | 22.3 (10) | 26.4 (10) | 1.5 (8)   | 2.6 (8)   | 4.7 (8)   |
| <b>C01H</b> | 27.1 (12) | 28.0 (12) | 30.2 (11) | 3.0 (9)   | 6.1 (9)   | 4.3 (9)   |
| <b>C01I</b> | 38.1 (13) | 31.2 (12) | 20.2 (10) | 6.4 (8)   | 5.0 (9)   | 0.7 (10)  |
| <b>C01J</b> | 29.5 (12) | 24.1 (11) | 33.9 (12) | 2.5 (9)   | 2.3 (9)   | -3.3 (9)  |
| <b>C01K</b> | 26.4 (11) | 26.6 (12) | 32.7 (12) | -7.3 (9)  | 1.8 (9)   | 3.3 (9)   |
| <b>C01L</b> | 30.5 (12) | 17.8 (10) | 30.8 (11) | -1.5 (8)  | -3.3 (9)  | 0.7 (9)   |
| <b>C01M</b> | 27.7 (11) | 21.1 (11) | 31.1 (11) | 3.4 (8)   | -2.9 (9)  | 2.9 (9)   |
| <b>C01N</b> | 23.6 (11) | 26.3 (11) | 30.2 (11) | 1.9 (9)   | -0.1 (9)  | 1.7 (9)   |
| <b>C01O</b> | 28.5 (12) | 22.5 (11) | 31.0 (11) | 1.3 (9)   | -3.6 (9)  | 2.0 (9)   |
| <b>C01P</b> | 25.0 (11) | 27.8 (12) | 37.3 (12) | 5.7 (9)   | -4.6 (9)  | 6.1 (9)   |
| <b>C01Q</b> | 30.8 (12) | 23.5 (12) | 41.5 (13) | 10.4 (9)  | 4.4 (10)  | 6.1 (9)   |
| <b>C01R</b> | 24.5 (11) | 34.3 (12) | 26.9 (11) | -0.2 (9)  | 3.7 (9)   | 4.5 (9)   |
| <b>C01S</b> | 23.9 (11) | 27.0 (11) | 28.3 (11) | 1.4 (8)   | 1.6 (8)   | 2.4 (9)   |
| <b>C01T</b> | 31.4 (12) | 24.6 (11) | 34.1 (12) | -3.7 (9)  | 5.8 (9)   | -3.6 (9)  |
| <b>C01U</b> | 28.3 (12) | 29.1 (12) | 29.9 (11) | -4.0 (9)  | 2.3 (9)   | -7.8 (9)  |
| <b>C01V</b> | 31.3 (12) | 20.3 (11) | 40.3 (13) | -4.9 (9)  | -1.5 (10) | 1.5 (9)   |
| <b>C01W</b> | 22.2 (11) | 33.8 (12) | 30.4 (11) | 1.1 (9)   | 3.0 (9)   | 5.3 (9)   |
| <b>C01X</b> | 26.5 (11) | 23.4 (11) | 35.9 (12) | 2.8 (9)   | 5.3 (9)   | -2.1 (9)  |
| <b>C01Y</b> | 27.4 (11) | 31.9 (12) | 20.8 (10) | 2.1 (8)   | 3.5 (8)   | 3.5 (9)   |
| <b>C01Z</b> | 20.0 (10) | 30.1 (12) | 30.0 (11) | 3.6 (9)   | -0.7 (8)  | 0.6 (9)   |
| <b>C020</b> | 28.7 (12) | 20.3 (11) | 40.1 (13) | 1.0 (9)   | -0.3 (10) | 3.3 (9)   |
| <b>C021</b> | 29.9 (12) | 22.5 (11) | 44.5 (14) | -4.8 (10) | -6.8 (10) | 3.2 (9)   |
| <b>C022</b> | 28.4 (12) | 29.7 (12) | 38.1 (13) | -4.3 (10) | -5.1 (10) | -3.0 (9)  |
| <b>C023</b> | 43.1 (14) | 15.6 (10) | 34.0 (12) | 1.6 (8)   | -8.7 (10) | 0.7 (9)   |
| <b>C024</b> | 37.4 (13) | 19.3 (11) | 40.6 (13) | 2.8 (9)   | -6.3 (10) | 1.8 (9)   |
| <b>C025</b> | 29.2 (12) | 35.9 (13) | 26.4 (11) | -3.7 (9)  | -1.5 (9)  | -0.5 (10) |
| <b>C026</b> | 28.1 (12) | 21.0 (11) | 45.6 (14) | -4.3 (9)  | 6.6 (10)  | -4.3 (9)  |
| <b>C027</b> | 28.9 (12) | 45.8 (15) | 29.2 (12) | -6.0 (10) | 3.3 (9)   | 4.3 (11)  |
| <b>C028</b> | 41.1 (14) | 19.6 (11) | 42.6 (14) | -0.1 (9)  | -         | 4.7 (10)  |
|             |           |           |           |           | 13.3 (11) |           |
| <b>C029</b> | 39.6 (14) | 20.2 (11) | 43.8 (14) | -3.6 (10) | -4.0 (11) | -3.4 (10) |
| <b>C02A</b> | 35.1 (13) | 27.2 (12) | 29.6 (11) | -6.1 (9)  | 6.1 (9)   | -3.5 (10) |
| <b>C02B</b> | 30.9 (12) | 21.9 (11) | 45.1 (14) | 9.0 (10)  | 7.3 (10)  | 4.8 (9)   |
| <b>C02C</b> | 31.6 (13) | 28.9 (12) | 40.4 (13) | -9.8 (10) | 3.3 (10)  | -9.7 (10) |
| <b>C02D</b> | 32.6 (12) | 30.4 (12) | 27.4 (11) | -7.5 (9)  | 4.0 (9)   | 3.5 (10)  |

|             |           |           |           |                |           |           |
|-------------|-----------|-----------|-----------|----------------|-----------|-----------|
| <b>C02E</b> | 39.1 (14) | 27.1 (12) | 36.6 (13) | -9.4 (10)      | 2.7 (10)  | -6.8 (10) |
| <b>C02F</b> | 35.9 (13) | 33.8 (13) | 38.5 (13) | 14.1 (10)      | 11.1 (10) | 13.3 (11) |
| <b>C02G</b> | 43.0 (14) | 34.7 (13) | 26.5 (11) | 2.1 (9)        | 5.4 (10)  | 13.1 (11) |
| <b>C02H</b> | 29.7 (12) | 28.8 (12) | 45.2 (14) | -<br>10.9 (10) | 2.6 (10)  | 0.8 (10)  |
| <b>C02I</b> | 31.6 (13) | 43.3 (15) | 41.3 (14) | -<br>18.7 (11) | 0.9 (10)  | 1.3 (11)  |
| <b>C02J</b> | 33.3 (13) | 49.1 (16) | 32.0 (13) | -1.2 (11)      | -3.5 (10) | 7.8 (11)  |
| <b>C02K</b> | 43.1 (15) | 35.8 (14) | 43.3 (14) | 20.3 (11)      | 15.8 (12) | 13.5 (12) |
| <b>C02L</b> | 48.5 (16) | 46.0 (16) | 41.7 (14) | 20.0 (12)      | 21.7 (12) | 22.0 (13) |
| <b>C02M</b> | 59.1 (18) | 41.4 (15) | 28.3 (12) | -0.7 (10)      | 9.8 (11)  | 15.1 (13) |
| <b>C02N</b> | 59.0 (18) | 49.5 (17) | 33.1 (13) | 14.4 (12)      | 21.1 (13) | 29.2 (14) |
| <b>C02O</b> | 49.9 (16) | 52.8 (17) | 26.5 (12) | 10.1 (11)      | 5.7 (11)  | 17.4 (13) |
| <b>O1</b>   | 27.2 (8)  | 44.1 (10) | 23.7 (8)  | 0.7 (7)        | 1.2 (6)   | 1.7 (7)   |

**Table S6: Bond Lengths for NA\_AV\_1152\_0118\_0ma.**

| <b>Atom</b> | <b>Atom</b> | <b>Length/Å</b> | <b>Atom</b> | <b>Atom</b> | <b>Length/Å</b> |
|-------------|-------------|-----------------|-------------|-------------|-----------------|
| <b>S001</b> | <b>C014</b> | 1.765 (2)       | <b>C00Y</b> | <b>C017</b> | 1.383 (3)       |
| <b>S001</b> | <b>C01D</b> | 1.765 (2)       | <b>C00Y</b> | <b>C018</b> | 1.397 (3)       |
| <b>S002</b> | <b>C01M</b> | 1.760 (2)       | <b>C00Z</b> | <b>C010</b> | 1.465 (3)       |
| <b>S002</b> | <b>C01O</b> | 1.766 (2)       | <b>C010</b> | <b>C012</b> | 1.403 (3)       |
| <b>S003</b> | <b>C02D</b> | 1.769 (2)       | <b>C011</b> | <b>C01X</b> | 1.409 (3)       |
| <b>S003</b> | <b>C02G</b> | 1.765 (3)       | <b>C012</b> | <b>C01F</b> | 1.473 (3)       |
| <b>O006</b> | <b>C00L</b> | 1.227 (2)       | <b>C013</b> | <b>C018</b> | 1.477 (3)       |
| <b>O007</b> | <b>C00Z</b> | 1.231 (2)       | <b>C013</b> | <b>C01C</b> | 1.456 (3)       |
| <b>O008</b> | <b>C013</b> | 1.241 (2)       | <b>C014</b> | <b>C01I</b> | 1.386 (3)       |
| <b>N00A</b> | <b>C00J</b> | 1.402 (2)       | <b>C015</b> | <b>C01G</b> | 1.392 (3)       |
| <b>N00A</b> | <b>C00K</b> | 1.384 (2)       | <b>C016</b> | <b>C020</b> | 1.353 (3)       |
| <b>N00A</b> | <b>C016</b> | 1.378 (3)       | <b>C017</b> | <b>C01M</b> | 1.409 (3)       |
| <b>N00B</b> | <b>C00K</b> | 1.340 (3)       | <b>C018</b> | <b>C01Z</b> | 1.392 (3)       |
| <b>N00B</b> | <b>C00U</b> | 1.363 (2)       | <b>C019</b> | <b>C02H</b> | 1.403 (3)       |
| <b>N00C</b> | <b>C00N</b> | 1.385 (3)       | <b>C01A</b> | <b>C01Q</b> | 1.357 (3)       |
| <b>N00C</b> | <b>C00S</b> | 1.394 (3)       | <b>C01B</b> | <b>C01H</b> | 1.384 (3)       |
| <b>N00D</b> | <b>C011</b> | 1.381 (3)       | <b>C01D</b> | <b>C023</b> | 1.396 (3)       |
| <b>N00D</b> | <b>C01C</b> | 1.401 (3)       | <b>C01E</b> | <b>C02F</b> | 1.387 (3)       |
| <b>N00D</b> | <b>C01U</b> | 1.378 (3)       | <b>C01E</b> | <b>C02G</b> | 1.398 (4)       |
| <b>N00E</b> | <b>C010</b> | 1.398 (3)       | <b>C01F</b> | <b>C01W</b> | 1.388 (3)       |
| <b>N00E</b> | <b>C019</b> | 1.376 (3)       | <b>C01F</b> | <b>C02B</b> | 1.395 (3)       |
| <b>N00E</b> | <b>C01R</b> | 1.379 (3)       | <b>C01G</b> | <b>C02D</b> | 1.402 (3)       |
| <b>N00F</b> | <b>C00W</b> | 1.359 (3)       | <b>C01H</b> | <b>C02A</b> | 1.382 (3)       |
| <b>N00F</b> | <b>C011</b> | 1.343 (3)       | <b>C01I</b> | <b>C01Y</b> | 1.383 (3)       |
| <b>N00G</b> | <b>C012</b> | 1.358 (3)       | <b>C01J</b> | <b>C01V</b> | 1.390 (3)       |
| <b>N00G</b> | <b>C019</b> | 1.345 (3)       | <b>C01K</b> | <b>C01V</b> | 1.385 (3)       |
| <b>N00H</b> | <b>C00T</b> | 1.391 (3)       | <b>C01L</b> | <b>C021</b> | 1.392 (3)       |
| <b>N00H</b> | <b>C017</b> | 1.393 (3)       | <b>C01M</b> | <b>C01P</b> | 1.384 (3)       |
| <b>N00I</b> | <b>C01E</b> | 1.390 (3)       | <b>C01N</b> | <b>C022</b> | 1.384 (3)       |
| <b>N00I</b> | <b>C01G</b> | 1.390 (3)       | <b>C01O</b> | <b>C024</b> | 1.386 (3)       |

|             |      |           |  |             |      |           |
|-------------|------|-----------|--|-------------|------|-----------|
| <b>C00J</b> | C00L | 1.462 (3) |  | <b>C01P</b> | C01Z | 1.380 (3) |
| <b>C00J</b> | C00U | 1.398 (3) |  | <b>C01Q</b> | C020 | 1.414 (3) |
| <b>C00K</b> | C01A | 1.408 (3) |  | <b>C01R</b> | C027 | 1.355 (3) |
| <b>C00L</b> | C00M | 1.490 (3) |  | <b>C01S</b> | C025 | 1.395 (3) |
| <b>C00M</b> | C00O | 1.390 (3) |  | <b>C01T</b> | C02E | 1.387 (3) |
| <b>C00M</b> | C01Y | 1.394 (3) |  | <b>C01U</b> | C02C | 1.356 (3) |
| <b>C00N</b> | C00O | 1.395 (3) |  | <b>C01W</b> | C02J | 1.392 (3) |
| <b>C00N</b> | C014 | 1.405 (3) |  | <b>C01X</b> | C026 | 1.366 (3) |
| <b>C00P</b> | C00R | 1.393 (3) |  | <b>C021</b> | C028 | 1.384 (4) |
| <b>C00P</b> | C00U | 1.478 (3) |  | <b>C022</b> | C029 | 1.379 (3) |
| <b>C00P</b> | C00X | 1.400 (3) |  | <b>C023</b> | C028 | 1.384 (4) |
| <b>C00Q</b> | C00W | 1.476 (3) |  | <b>C024</b> | C029 | 1.386 (3) |
| <b>C00Q</b> | C01B | 1.393 (3) |  | <b>C025</b> | C02A | 1.383 (3) |
| <b>C00Q</b> | C01S | 1.397 (3) |  | <b>C026</b> | C02C | 1.408 (3) |
| <b>C00R</b> | C01J | 1.387 (3) |  | <b>C027</b> | C02I | 1.412 (4) |
| <b>C00S</b> | C01D | 1.402 (3) |  | <b>C02B</b> | C02K | 1.377 (4) |
| <b>C00S</b> | C01L | 1.396 (3) |  | <b>C02D</b> | C02E | 1.381 (3) |
| <b>C00T</b> | C01N | 1.393 (3) |  | <b>C02F</b> | C02L | 1.389 (4) |
| <b>C00T</b> | C01O | 1.399 (3) |  | <b>C02G</b> | C02M | 1.397 (3) |
| <b>C00V</b> | C00Z | 1.488 (3) |  | <b>C02H</b> | C02I | 1.361 (4) |
| <b>C00V</b> | C015 | 1.392 (3) |  | <b>C02J</b> | C02O | 1.378 (4) |
| <b>C00V</b> | C01T | 1.396 (3) |  | <b>C02K</b> | C02O | 1.384 (4) |
| <b>C00W</b> | C01C | 1.396 (3) |  | <b>C02L</b> | C02N | 1.378 (4) |
| <b>C00X</b> | C01K | 1.388 (3) |  | <b>C02M</b> | C02N | 1.377 (4) |

**Table S7: Bond Angles for NA\_AV\_1152\_0118\_0ma.**

| <b>Atom</b> | <b>Atom</b> | <b>Atom</b> | <b>Angle/°</b> | <b>Atom</b> | <b>Atom</b> | <b>Atom</b> | <b>Angle/°</b> |
|-------------|-------------|-------------|----------------|-------------|-------------|-------------|----------------|
| <b>C014</b> | S001        | C01D        | 101.79 (10)    | <b>N00H</b> | C017        | C01M        | 122.28 (19)    |
| <b>C01M</b> | S002        | C01O        | 101.80 (10)    | <b>C00Y</b> | C017        | N00H        | 119.42 (18)    |
| <b>C02G</b> | S003        | C02D        | 99.88 (11)     | <b>C00Y</b> | C017        | C01M        | 118.25 (19)    |
| <b>C00K</b> | N00A        | C00J        | 107.00 (16)    | <b>C00Y</b> | C018        | C013        | 120.72 (18)    |
| <b>C016</b> | N00A        | C00J        | 131.35 (17)    | <b>C01Z</b> | C018        | C00Y        | 120.0 (2)      |
| <b>C016</b> | N00A        | C00K        | 121.53 (17)    | <b>C01Z</b> | C018        | C013        | 119.22 (19)    |
| <b>C00K</b> | N00B        | C00U        | 106.34 (17)    | <b>N00E</b> | C019        | C02H        | 119.4 (2)      |
| <b>C00N</b> | N00C        | C00S        | 124.29 (17)    | <b>N00G</b> | C019        | N00E        | 111.53 (18)    |
| <b>C011</b> | N00D        | C01C        | 106.95 (17)    | <b>N00G</b> | C019        | C02H        | 129.1 (2)      |
| <b>C01U</b> | N00D        | C011        | 121.65 (19)    | <b>C01Q</b> | C01A        | C00K        | 118.8 (2)      |
| <b>C01U</b> | N00D        | C01C        | 131.27 (19)    | <b>C01H</b> | C01B        | C00Q        | 120.8 (2)      |
| <b>C019</b> | N00E        | C010        | 107.06 (18)    | <b>N00D</b> | C01C        | C013        | 121.26 (18)    |
| <b>C019</b> | N00E        | C01R        | 121.66 (19)    | <b>C00W</b> | C01C        | N00D        | 104.71 (17)    |
| <b>C01R</b> | N00E        | C010        | 131.27 (19)    | <b>C00W</b> | C01C        | C013        | 133.91 (19)    |
| <b>C011</b> | N00F        | C00W        | 106.05 (17)    | <b>C00S</b> | C01D        | S001        | 121.79 (16)    |
| <b>C019</b> | N00G        | C012        | 105.51 (18)    | <b>C023</b> | C01D        | S001        | 117.94 (17)    |
| <b>C00T</b> | N00H        | C017        | 124.83 (18)    | <b>C023</b> | C01D        | C00S        | 120.1 (2)      |
| <b>C01E</b> | N00I        | C01G        | 123.0 (2)      | <b>N00I</b> | C01E        | C02G        | 120.1 (2)      |
| <b>N00A</b> | C00J        | C00L        | 119.86 (17)    | <b>C02F</b> | C01E        | N00I        | 120.7 (2)      |

|      |      |      |             |      |      |      |             |
|------|------|------|-------------|------|------|------|-------------|
| C00U | C00J | N00A | 104.78 (16) | C02F | C01E | C02G | 119.2 (2)   |
| C00U | C00J | C00L | 135.33 (18) | C01W | C01F | C012 | 120.8 (2)   |
| N00A | C00K | C01A | 119.43 (19) | C01W | C01F | C02B | 119.3 (2)   |
| N00B | C00K | N00A | 110.90 (17) | C02B | C01F | C012 | 119.8 (2)   |
| N00B | C00K | C01A | 129.59 (19) | N00I | C01G | C015 | 120.4 (2)   |
| O006 | C00L | C00J | 120.90 (18) | N00I | C01G | C02D | 121.28 (19) |
| O006 | C00L | C00M | 118.74 (18) | C015 | C01G | C02D | 118.3 (2)   |
| C00J | C00L | C00M | 120.31 (17) | C02A | C01H | C01B | 120.1 (2)   |
| C00O | C00M | C00L | 122.10 (18) | C01Y | C01I | C014 | 120.6 (2)   |
| C00O | C00M | C01Y | 120.07 (19) | C00R | C01J | C01V | 120.4 (2)   |
| C01Y | C00M | C00L | 117.43 (19) | C01V | C01K | C00X | 120.5 (2)   |
| N00C | C00N | C00O | 119.51 (18) | C021 | C01L | C00S | 120.5 (2)   |
| N00C | C00N | C014 | 122.30 (18) | C017 | C01M | S002 | 121.75 (17) |
| C00O | C00N | C014 | 118.18 (19) | C01P | C01M | S002 | 117.54 (16) |
| C00M | C00O | C00N | 120.96 (18) | C01P | C01M | C017 | 120.4 (2)   |
| C00R | C00P | C00U | 122.11 (18) | C022 | C01N | C00T | 120.8 (2)   |
| C00R | C00P | C00X | 118.64 (19) | C00T | C01O | S002 | 122.42 (17) |
| C00X | C00P | C00U | 119.18 (18) | C024 | C01O | S002 | 116.87 (17) |
| C01B | C00Q | C00W | 121.60 (18) | C024 | C01O | C00T | 120.5 (2)   |
| C01B | C00Q | C01S | 118.71 (19) | C01Z | C01P | C01M | 120.9 (2)   |
| C01S | C00Q | C00W | 119.67 (19) | C01A | C01Q | C020 | 120.5 (2)   |
| C01J | C00R | C00P | 120.6 (2)   | C027 | C01R | N00E | 118.8 (2)   |
| N00C | C00S | C01D | 121.8 (2)   | C025 | C01S | C00Q | 120.1 (2)   |
| N00C | C00S | C01L | 119.34 (19) | C02E | C01T | C00V | 119.2 (2)   |
| C01L | C00S | C01D | 118.83 (19) | C02C | C01U | N00D | 118.9 (2)   |
| N00H | C00T | C01N | 119.87 (19) | C01K | C01V | C01J | 119.4 (2)   |
| N00H | C00T | C01O | 121.99 (19) | C01F | C01W | C02J | 120.3 (2)   |
| C01N | C00T | C01O | 118.1 (2)   | C026 | C01X | C011 | 118.7 (2)   |
| N00B | C00U | C00J | 110.93 (18) | C01I | C01Y | C00M | 119.5 (2)   |
| N00B | C00U | C00P | 118.84 (17) | C01P | C01Z | C018 | 119.2 (2)   |
| C00J | C00U | C00P | 130.21 (18) | C016 | C020 | C01Q | 120.9 (2)   |
| C015 | C00V | C00Z | 120.91 (18) | C028 | C021 | C01L | 120.4 (2)   |
| C015 | C00V | C01T | 119.99 (19) | C029 | C022 | C01N | 120.8 (2)   |
| C01T | C00V | C00Z | 119.00 (19) | C028 | C023 | C01D | 120.4 (2)   |
| N00F | C00W | C00Q | 120.14 (18) | C01O | C024 | C029 | 120.7 (2)   |
| N00F | C00W | C01C | 111.21 (18) | C02A | C025 | C01S | 120.2 (2)   |
| C01C | C00W | C00Q | 128.64 (19) | C01X | C026 | C02C | 120.5 (2)   |
| C01K | C00X | C00P | 120.5 (2)   | C01R | C027 | C02I | 120.9 (2)   |
| C017 | C00Y | C018 | 121.05 (19) | C021 | C028 | C023 | 119.8 (2)   |
| O007 | C00Z | C00V | 121.92 (19) | C022 | C029 | C024 | 119.0 (2)   |
| O007 | C00Z | C010 | 121.28 (19) | C01H | C02A | C025 | 119.9 (2)   |
| C010 | C00Z | C00V | 116.76 (18) | C02K | C02B | C01F | 119.8 (2)   |
| N00E | C010 | C00Z | 122.40 (18) | C01U | C02C | C026 | 120.8 (2)   |
| N00E | C010 | C012 | 104.37 (18) | C01G | C02D | S003 | 118.80 (18) |
| C012 | C010 | C00Z | 133.23 (19) | C02E | C02D | S003 | 120.03 (18) |
| N00D | C011 | C01X | 119.4 (2)   | C02E | C02D | C01G | 120.8 (2)   |
| N00F | C011 | N00D | 111.05 (18) | C02D | C02E | C01T | 120.5 (2)   |
| N00F | C011 | C01X | 129.5 (2)   | C01E | C02F | C02L | 120.5 (3)   |

|             |      |      |             |      |      |      |             |
|-------------|------|------|-------------|------|------|------|-------------|
| <b>N00G</b> | C012 | C010 | 111.49 (19) | C01E | C02G | S003 | 120.30 (18) |
| <b>N00G</b> | C012 | C01F | 120.30 (19) | C02M | C02G | S003 | 120.0 (2)   |
| <b>C010</b> | C012 | C01F | 128.17 (19) | C02M | C02G | C01E | 119.7 (3)   |
| <b>O008</b> | C013 | C018 | 119.96 (19) | C02I | C02H | C019 | 119.3 (2)   |
| <b>O008</b> | C013 | C01C | 119.69 (19) | C02H | C02I | C027 | 120.0 (2)   |
| <b>C01C</b> | C013 | C018 | 120.34 (18) | C02O | C02J | C01W | 120.0 (2)   |
| <b>C00N</b> | C014 | S001 | 121.44 (17) | C02B | C02K | C02O | 120.9 (2)   |
| <b>C01I</b> | C014 | S001 | 117.83 (16) | C02N | C02L | C02F | 120.1 (3)   |
| <b>C01I</b> | C014 | C00N | 120.69 (19) | C02N | C02M | C02G | 120.3 (3)   |
| <b>C00V</b> | C015 | C01G | 120.76 (19) | C02M | C02N | C02L | 120.2 (2)   |
| <b>C020</b> | C016 | N00A | 118.8 (2)   | C02J | C02O | C02K | 119.6 (2)   |

**Table S8: Torsion Angles for NA\_AV\_1152\_0118\_0ma.**

| <b>A</b>    | <b>B</b> | <b>C</b> | <b>D</b> | <b>Angle/°</b> | <b>A</b> | <b>B</b> | <b>C</b> | <b>D</b> | <b>Angle/°</b> |
|-------------|----------|----------|----------|----------------|----------|----------|----------|----------|----------------|
| <b>S001</b> | C014     | C01I     | C01Y     | 177.78 (18)    | C00Z     | C010     | C012     | C01F     | -4.0 (4)       |
| <b>S001</b> | C01D     | C023     | C028     | 172.91 (17)    | C010     | N00E     | C019     | N00G     | -2.1 (2)       |
| <b>S002</b> | C01M     | C01P     | C01Z     | 168.17 (18)    | C010     | N00E     | C019     | C02H     | 178.8 (2)      |
| <b>S002</b> | C01O     | C024     | C029     | 175.9 (2)      | C010     | N00E     | C01R     | C027     | -177.2 (2)     |
| <b>S003</b> | C02D     | C02E     | C01T     | 168.07 (19)    | C010     | C012     | C01F     | C01W     | -49.2 (3)      |
| <b>S003</b> | C02G     | C02M     | C02N     | 175.72 (19)    | C010     | C012     | C01F     | C02B     | 128.0 (2)      |
| <b>O006</b> | C00L     | C00M     | C00O     | 137.7 (2)      | C011     | N00D     | C01C     | C00W     | 1.6 (2)        |
| <b>O006</b> | C00L     | C00M     | C01Y     | -35.1 (3)      | C011     | N00D     | C01C     | C013     | 178.25 (18)    |
| <b>O007</b> | C00Z     | C010     | N00E     | -23.3 (3)      | C011     | N00D     | C01U     | C02C     | -1.0 (3)       |
| <b>O007</b> | C00Z     | C010     | C012     | 156.8 (2)      | C011     | N00F     | C00W     | C00Q     | -178.53 (18)   |
| <b>O008</b> | C013     | C018     | C00Y     | 140.2 (2)      | C011     | N00F     | C00W     | C01C     | 0.3 (2)        |
| <b>O008</b> | C013     | C018     | C01Z     | -36.3 (3)      | C011     | C01X     | C026     | C02C     | -0.3 (3)       |
| <b>O008</b> | C013     | C01C     | N00D     | -23.7 (3)      | C012     | N00G     | C019     | N00E     | 1.1 (2)        |
| <b>O008</b> | C013     | C01C     | C00W     | 151.8 (2)      | C012     | N00G     | C019     | C02H     | -179.8 (2)     |
| <b>N00A</b> | C00J     | C00L     | O006     | -22.5 (3)      | C012     | C01F     | C01W     | C02J     | 176.9 (2)      |



|             |      |      |      |             |      |      |      |      |             |
|-------------|------|------|------|-------------|------|------|------|------|-------------|
| <b>N00A</b> | C00J | C00L | C00M | 154.99(18)  | C012 | C01F | C02B | C02K | -174.9(2)   |
| <b>N00A</b> | C00J | C00U | N00B | -1.4(2)     | C013 | C018 | C01Z | C01P | 175.9(2)    |
| <b>N00A</b> | C00J | C00U | C00P | 176.93(19)  | C014 | S001 | C01D | C00S | 19.9(2)     |
| <b>N00A</b> | C00K | C01A | C01Q | -0.7(3)     | C014 | S001 | C01D | C023 | -165.25(17) |
| <b>N00A</b> | C016 | C020 | C01Q | -0.9(3)     | C014 | C00N | C00O | C00M | 0.5(3)      |
| <b>N00B</b> | C00K | C01A | C01Q | 175.7(2)    | C014 | C01I | C01Y | C00M | 0.5(3)      |
| <b>N00C</b> | C00N | C00O | C00M | -178.81(18) | C015 | C00V | C00Z | O007 | 143.1(2)    |
| <b>N00C</b> | C00N | C014 | S001 | 1.1(3)      | C015 | C00V | C00Z | C010 | -39.0(3)    |
| <b>N00C</b> | C00N | C014 | C01I | 178.8(2)    | C015 | C00V | C01T | C02E | 5.9(3)      |
| <b>N00C</b> | C00S | C01D | S001 | -3.5(3)     | C015 | C01G | C02D | S003 | -168.65(16) |
| <b>N00C</b> | C00S | C01D | C023 | -178.25(19) | C015 | C01G | C02D | C02E | 4.2(3)      |
| <b>N00C</b> | C00S | C01L | C021 | 176.29(19)  | C016 | N00A | C00J | C00L | 0.1(3)      |
| <b>N00D</b> | C011 | C01X | C026 | -1.4(3)     | C016 | N00A | C00J | C00U | 178.2(2)    |
| <b>N00D</b> | C01U | C02C | C026 | -0.7(3)     | C016 | N00A | C00K | N00B | -178.96(18) |
| <b>N00E</b> | C010 | C012 | N00G | -1.5(2)     | C016 | N00A | C00K | C01A | -1.9(3)     |
| <b>N00E</b> | C010 | C012 | C01F | 176.1(2)    | C017 | N00H | C00T | C01N | -164.3(2)   |
| <b>N00E</b> | C019 | C02H | C02I | -0.7(3)     | C017 | N00H | C00T | C01O | 17.9(3)     |
| <b>N00E</b> | C01R | C027 | C02I | -1.8(3)     | C017 | C00Y | C018 | C013 | -172.52(19) |
| <b>N00F</b> | C00W | C01C | N00D | -1.2(2)     | C017 | C00Y | C018 | C01Z | 4.0(3)      |
| <b>N00F</b> | C00W | C01C | C013 | -177.2(2)   | C017 | C01M | C01P | C01Z | 5.2(4)      |
| <b>N00F</b> | C011 | C01X | C026 | 178.7(2)    | C018 | C00Y | C017 | N00H | 174.83(19)  |
| <b>N00G</b> | C012 | C01F | C01W | 128.2(2)    | C018 | C00Y | C017 | C01M | -2.7(3)     |
| <b>N00</b>  | C012 | C01F | C02B | -54.6(3)    | C018 | C013 | C01  | N00D | 155.06(1)   |

|             |      |      |      |              |  |      |          |      |      |              |
|-------------|------|------|------|--------------|--|------|----------|------|------|--------------|
| <b>G</b>    |      |      |      |              |  |      | <b>C</b> |      | 9)   |              |
| <b>N00G</b> | C019 | C02H | C02I | -179.7 (2)   |  | C018 | C013     | C01C | C00W | -29.5 (3)    |
| <b>N00H</b> | C00T | C01N | C022 | -176.5 (2)   |  | C019 | N00E     | C010 | C00Z | -177.85 (19) |
| <b>N00H</b> | C00T | C01O | S002 | 1.1 (3)      |  | C019 | N00E     | C010 | C012 | 2.1 (2)      |
| <b>N00H</b> | C00T | C01O | C024 | 176.1 (2)    |  | C019 | N00E     | C01R | C027 | 1.3 (3)      |
| <b>N00H</b> | C017 | C01M | S002 | -6.2 (3)     |  | C019 | N00G     | C012 | C010 | 0.2 (2)      |
| <b>N00H</b> | C017 | C01M | C01P | -179.3 (2)   |  | C019 | N00G     | C012 | C01F | -177.58 (19) |
| <b>N00I</b> | C01E | C02F | C02L | -179.7 (2)   |  | C019 | C02H     | C02I | C027 | 0.2 (4)      |
| <b>N00I</b> | C01E | C02G | S003 | -4.4 (3)     |  | C01A | C01Q     | C020 | C016 | -1.7 (4)     |
| <b>N00I</b> | C01E | C02G | C02M | 177.7 (2)    |  | C01B | C00Q     | C00W | N00F | 140.0 (2)    |
| <b>N00I</b> | C01G | C02D | S003 | 8.8 (3)      |  | C01B | C00Q     | C00W | C01C | -38.6 (3)    |
| <b>N00I</b> | C01G | C02D | C02E | -178.4 (2)   |  | C01B | C00Q     | C01S | C025 | 2.9 (3)      |
| <b>C00J</b> | N00A | C00K | N00B | -2.6 (2)     |  | C01B | C01H     | C02A | C025 | 2.0 (3)      |
| <b>C00J</b> | N00A | C00K | C01A | 174.36 (18)  |  | C01C | N00D     | C011 | N00F | -1.6 (2)     |
| <b>C00J</b> | N00A | C016 | C020 | -172.6 (2)   |  | C01C | N00D     | C011 | C01X | 178.44 (19)  |
| <b>C00J</b> | C00L | C00M | C00O | -39.8 (3)    |  | C01C | N00D     | C01U | C02C | -176.4 (2)   |
| <b>C00J</b> | C00L | C00M | C01Y | 147.4 (2)    |  | C01C | C013     | C018 | C00Y | -38.5 (3)    |
| <b>C00K</b> | N00A | C00J | C00L | -175.68 (18) |  | C01C | C013     | C018 | C01Z | 145.0 (2)    |
| <b>C00K</b> | N00A | C00J | C00U | 2.4 (2)      |  | C01D | S001     | C014 | C00N | -18.7 (2)    |
| <b>C00K</b> | N00A | C016 | C020 | 2.7 (3)      |  | C01D | S001     | C014 | C01I | 163.50 (18)  |
| <b>C00K</b> | N00B | C00U | C00J | -0.2 (2)     |  | C01D | C00S     | C01L | C021 | -1.7 (3)     |
| <b>C00K</b> | N00B | C00U | C00P | -178.72 (17) |  | C01D | C023     | C028 | C021 | -1.7 (3)     |
| <b>C00K</b> | C01A | C01Q | C020 | 2.5 (3)      |  | C01E | N00I     | C01G | C015 | -153.8 (2)   |
| <b>C00L</b> | C00J | C00  | N00B | 176.2 (2)    |  | C01E | N00I     | C01  | C02D | 28.8 (3)     |

|             |      |      |      |              |  |      |      |      |      |              |
|-------------|------|------|------|--------------|--|------|------|------|------|--------------|
|             |      | U    |      |              |  |      | G    |      |      |              |
| <b>C00L</b> | C00J | C00U | C00P | -5.5 (4)     |  | C01E | C02F | C02L | C02N | 1.8 (4)      |
| <b>C00L</b> | C00M | C00O | C00N | -172.60 (18) |  | C01E | C02G | C02M | C02N | 2.2 (4)      |
| <b>C00L</b> | C00M | C01Y | C01I | 172.4 (2)    |  | C01F | C01W | C02J | C02O | -1.6 (4)     |
| <b>C00N</b> | N00C | C00S | C01D | -20.6 (3)    |  | C01F | C02B | C02K | C02O | -2.6 (4)     |
| <b>C00N</b> | N00C | C00S | C01L | 161.50 (19)  |  | C01G | N00I | C01E | C02F | 148.9 (2)    |
| <b>C00N</b> | C014 | C01I | C01Y | 0.0 (3)      |  | C01G | N00I | C01E | C02G | -31.1 (3)    |
| <b>C00O</b> | C00M | C01Y | C01I | -0.5 (3)     |  | C01G | C02D | C02E | C01T | -4.7 (4)     |
| <b>C00O</b> | C00N | C014 | S001 | -178.24 (15) |  | C01L | C00S | C01D | S001 | 174.42 (16)  |
| <b>C00O</b> | C00N | C014 | C01I | -0.5 (3)     |  | C01L | C00S | C01D | C023 | -0.3 (3)     |
| <b>C00P</b> | C00R | C01J | C01V | -0.1 (3)     |  | C01L | C021 | C028 | C023 | -0.3 (3)     |
| <b>C00P</b> | C00X | C01K | C01V | -0.5 (3)     |  | C01M | S002 | C01O | C00T | -16.8 (2)    |
| <b>C00Q</b> | C00W | C01C | N00D | 177.45 (19)  |  | C01M | S002 | C01O | C024 | 168.09 (19)  |
| <b>C00Q</b> | C00W | C01C | C013 | 1.5 (4)      |  | C01M | C01P | C01Z | C018 | -3.9 (3)     |
| <b>C00Q</b> | C01B | C01H | C02A | 0.4 (3)      |  | C01N | C00T | C01O | S002 | -176.74 (17) |
| <b>C00Q</b> | C01S | C025 | C02A | -0.5 (3)     |  | C01N | C00T | C01O | C024 | -1.8 (3)     |
| <b>C00R</b> | C00P | C00U | N00B | 141.19 (19)  |  | C01N | C022 | C029 | C024 | -1.3 (4)     |
| <b>C00R</b> | C00P | C00U | C00J | -37.0 (3)    |  | C01O | S002 | C01M | C017 | 19.1 (2)     |
| <b>C00R</b> | C00P | C00X | C01K | 0.4 (3)      |  | C01O | S002 | C01M | C01P | -167.56 (19) |
| <b>C00R</b> | C01J | C01V | C01K | 0.0 (3)      |  | C01O | C00T | C01N | C022 | 1.4 (3)      |
| <b>C00S</b> | N00C | C00N | C00O | -158.76 (19) |  | C01O | C024 | C029 | C022 | 0.9 (4)      |
| <b>C00S</b> | N00C | C00N | C014 | 21.9 (3)     |  | C01R | N00E | C010 | C00Z | 0.8 (3)      |
| <b>C00S</b> | C01D | C023 | C028 | 2.0 (3)      |  | C01R | N00E | C010 | C012 | -179.3 (2)   |
| <b>C00S</b> | C01L | C021 | C028 | 2.0 (3)      |  | C01R | N00E | C019 | N00G | 179.15 (1)   |

|                  |          |          |          |                      |  |          |          |          |          |                      |
|------------------|----------|----------|----------|----------------------|--|----------|----------|----------|----------|----------------------|
|                  |          |          |          |                      |  | R        | E        |          | 9)       |                      |
| <b>C00T</b>      | N00<br>H | C017     | C00Y     | 167.4 (2)            |  | C01<br>R | N00<br>E | C019     | C02H     | 0.0 (3)              |
| <b>C00T</b>      | N00<br>H | C017     | C01<br>M | -15.2 (3)            |  | C01<br>R | C027     | C02I     | C02H     | 1.1 (4)              |
| <b>C00T</b>      | C01<br>N | C022     | C029     | 0.1 (4)              |  | C01S     | C00<br>Q | C00<br>W | N00F     | -41.7 (3)            |
| <b>C00T</b>      | C01<br>O | C024     | C029     | 0.7 (4)              |  | C01S     | C00<br>Q | C00<br>W | C01C     | 139.7 (2)            |
| <b>C00<br/>U</b> | N00<br>B | C00<br>K | N00<br>A | 1.8 (2)              |  | C01S     | C00<br>Q | C01<br>B | C01H     | -2.8 (3)             |
| <b>C00<br/>U</b> | N00<br>B | C00<br>K | C01A     | -<br>174.9 (2)       |  | C01S     | C025     | C02<br>A | C01H     | -1.9 (3)             |
| <b>C00<br/>U</b> | C00J     | C00<br>L | O006     | 160.2 (2)            |  | C01T     | C00<br>V | C00Z     | O007     | -40.5 (3)            |
| <b>C00<br/>U</b> | C00J     | C00<br>L | C00<br>M | -22.3 (3)            |  | C01T     | C00<br>V | C00Z     | C010     | 137.4 (2)            |
| <b>C00<br/>U</b> | C00P     | C00<br>R | C01J     | -<br>176.94 (1<br>9) |  | C01T     | C00<br>V | C015     | C01G     | -6.4 (3)             |
| <b>C00<br/>U</b> | C00P     | C00<br>X | C01K     | 177.32 (1<br>9)      |  | C01<br>U | N00<br>D | C011     | N00F     | -<br>177.98 (1<br>8) |
| <b>C00<br/>V</b> | C00Z     | C010     | N00E     | 158.79 (1<br>9)      |  | C01<br>U | N00<br>D | C011     | C01X     | 2.1 (3)              |
| <b>C00<br/>V</b> | C00Z     | C010     | C012     | -21.1 (3)            |  | C01<br>U | N00<br>D | C01<br>C | C00<br>W | 177.6 (2)            |
| <b>C00<br/>V</b> | C015     | C01<br>G | N00I     | -<br>176.11 (1<br>9) |  | C01<br>U | N00<br>D | C01<br>C | C013     | -5.9 (3)             |
| <b>C00<br/>V</b> | C015     | C01<br>G | C02D     | 1.3 (3)              |  | C01<br>W | C01F     | C02<br>B | C02K     | 2.3 (3)              |
| <b>C00<br/>V</b> | C01T     | C02<br>E | C02D     | -0.4 (4)             |  | C01<br>W | C02J     | C02<br>O | C02K     | 1.3 (4)              |
| <b>C00<br/>W</b> | N00F     | C011     | N00<br>D | 0.8 (2)              |  | C01<br>X | C026     | C02<br>C | C01U     | 1.3 (4)              |
| <b>C00<br/>W</b> | N00F     | C011     | C01X     | -<br>179.2 (2)       |  | C01<br>Y | C00<br>M | C00<br>O | C00N     | 0.0 (3)              |
| <b>C00<br/>W</b> | C00<br>Q | C01<br>B | C01H     | 175.52 (1<br>9)      |  | C02<br>B | C01F     | C01<br>W | C02J     | -0.2 (3)             |
| <b>C00<br/>W</b> | C00<br>Q | C01S     | C025     | -<br>175.5 (2)       |  | C02<br>B | C02<br>K | C02<br>O | C02J     | 0.7 (4)              |
| <b>C00<br/>X</b> | C00P     | C00<br>R | C01J     | -0.1 (3)             |  | C02<br>D | S003     | C02<br>G | C01E     | 31.7 (2)             |
| <b>C00<br/>X</b> | C00P     | C00<br>U | N00B     | -35.6 (3)            |  | C02<br>D | S003     | C02<br>G | C02<br>M | -<br>150.4 (2)       |
| <b>C00<br/>X</b> | C00P     | C00<br>U | C00J     | 146.2 (2)            |  | C02F     | C01E     | C02<br>G | S003     | 175.54 (1<br>7)      |
| <b>C00<br/>X</b> | C01<br>K | C01<br>V | C01J     | 0.3 (3)              |  | C02F     | C01E     | C02<br>G | C02<br>M | -2.3 (3)             |

|                  |          |          |          |                 |  |          |          |          |          |           |
|------------------|----------|----------|----------|-----------------|--|----------|----------|----------|----------|-----------|
| <b>C00<br/>Y</b> | C017     | C01<br>M | S002     | 171.25 (1<br>7) |  | C02F     | C02L     | C02<br>N | C02<br>M | -2.0 (4)  |
| <b>C00<br/>Y</b> | C017     | C01<br>M | C01P     | -1.9 (3)        |  | C02<br>G | S003     | C02<br>D | C01G     | -33.6 (2) |
| <b>C00<br/>Y</b> | C018     | C01<br>Z | C01P     | -0.6 (3)        |  | C02<br>G | S003     | C02<br>D | C02E     | 153.5 (2) |
| <b>C00Z</b>      | C00<br>V | C015     | C01G     | 169.98 (1<br>9) |  | C02<br>G | C01E     | C02F     | C02L     | 0.4 (3)   |
| <b>C00Z</b>      | C00<br>V | C01<br>T | C02E     | -<br>170.5 (2)  |  | C02<br>G | C02<br>M | C02<br>N | C02L     | 0.0 (4)   |
| <b>C00Z</b>      | C010     | C012     | N00<br>G | 178.4 (2)       |  |          |          |          |          |           |

**Table S9: Hydrogen Atom Coordinates ( $\text{\AA} \times 10^4$ ) and Isotropic Displacement Parameters ( $\text{\AA}^2 \times 10^3$ ) for NA\_AV\_1152\_0118\_0ma.**

| <b>Atom</b> | <b>x</b> | <b>y</b> | <b>z</b> | <b>U(eq)</b> |
|-------------|----------|----------|----------|--------------|
| <b>H00C</b> | 4936.71  | 4131.44  | 3811.08  | 28           |
| <b>H00H</b> | 1874.94  | 2420.58  | 6074.37  | 33           |
| <b>H00I</b> | 9026.6   | 3734.23  | 7717.72  | 34           |
| <b>H00O</b> | 6223.76  | 3584.55  | 3797.11  | 24           |
| <b>H00R</b> | 8967.49  | 3915.37  | 4013.43  | 28           |
| <b>H00X</b> | 7093.78  | 3782.01  | 5990     | 28           |
| <b>H00Y</b> | 3332.29  | 2892.25  | 6115.92  | 26           |
| <b>H015</b> | 9672.4   | 3882.35  | 6332.43  | 26           |
| <b>H016</b> | 8187.98  | 2319.44  | 3510.42  | 29           |
| <b>H01A</b> | 8144.48  | 2375.02  | 6406.7   | 34           |
| <b>H01B</b> | 5953.55  | 2822.3   | 5210.13  | 29           |
| <b>H01H</b> | 5807.91  | 2225.56  | 4459.9   | 34           |
| <b>H01I</b> | 7502.41  | 4120.06  | 1360.72  | 36           |
| <b>H01J</b> | 8968.97  | 4609.97  | 4209.54  | 35           |
| <b>H01K</b> | 7088.67  | 4477.76  | 6173.75  | 34           |
| <b>H01L</b> | 3024.62  | 4310.47  | 3694.14  | 32           |
| <b>H01N</b> | 510.89   | 2013.83  | 5356.17  | 32           |
| <b>H01P</b> | 5708.48  | 1887.26  | 7127.17  | 36           |
| <b>H01Q</b> | 8064.98  | 1763.02  | 5726.81  | 38           |
| <b>H01R</b> | 11026.88 | 3931.37  | 3580.84  | 34           |
| <b>H01S</b> | 3218.82  | 3246.94  | 3971.54  | 32           |
| <b>H01T</b> | 12161.99 | 4685.81  | 6215.36  | 36           |
| <b>H01U</b> | 5168.45  | 3995.44  | 7433.32  | 35           |
| <b>H01V</b> | 8030.88  | 4894.56  | 5291.02  | 37           |
| <b>H01W</b> | 12830.6  | 3688.89  | 6690.29  | 35           |
| <b>H01X</b> | 4152.8   | 4645.17  | 4931.95  | 34           |
| <b>H01Y</b> | 8438.45  | 3586.94  | 2016.27  | 32           |
| <b>H01Z</b> | 6295.88  | 2554.59  | 7152.8   | 32           |
| <b>H020</b> | 8131.4   | 1736.34  | 4277.95  | 36           |
| <b>H021</b> | 1681.68  | 4722.76  | 3051.86  | 39           |

|      |          |         |          |    |
|------|----------|---------|----------|----|
| H022 | -278.44  | 1381.33 | 5181.74  | 39 |
| H023 | 3677.54  | 4948.18 | 1194.92  | 38 |
| H024 | 2319.01  | 879.43  | 6434.93  | 39 |
| H025 | 3079.42  | 2644.41 | 3222.43  | 37 |
| H026 | 4412.4   | 5010.92 | 6148.38  | 38 |
| H027 | 10720.8  | 3516.37 | 2449     | 42 |
| H028 | 2002.21  | 5039.13 | 1801.87  | 42 |
| H029 | 598.88   | 812.19  | 5738.12  | 42 |
| H02A | 4345.18  | 2128.5  | 3492.94  | 37 |
| H02B | 10179.19 | 2970.7  | 6923.53  | 39 |
| H02C | 4888.87  | 4682.41 | 7400.99  | 40 |
| H02E | 11947.74 | 4858.26 | 7597.69  | 41 |
| H02F | 7272.92  | 3878    | 8379.82  | 43 |
| H02H | 10854.29 | 2532.46 | 3922.27  | 41 |
| H02I | 10665.59 | 2812.64 | 2613.2   | 47 |
| H02J | 13095.22 | 3714.35 | 8131.14  | 46 |
| H02K | 10392.16 | 3031.52 | 8351.73  | 48 |
| H02L | 6482.03  | 4170.19 | 9516.63  | 54 |
| H02M | 9258     | 4800.04 | 10040.17 | 51 |
| H02N | 7457.05  | 4643.54 | 10318.94 | 56 |
| H02O | 11856.37 | 3394.95 | 8961.45  | 52 |
| H1A  | 7397.22  | 1736.17 | 2424.58  | 47 |
| H1B  | 8124.67  | 1779.83 | 1809.9   | 47 |

**Table S10: Solvent masks information for NA\_AV\_1152\_0118\_0ma.**

| Number | X      | Y      | Z     | Volume | Electron count | Content |
|--------|--------|--------|-------|--------|----------------|---------|
| 1      | 0.035  | -0.053 | 0.273 | 38.2   | 0.0            | ?       |
| 2      | -0.035 | 0.053  | 0.727 | 38.2   | 0.0            | ?       |
| 3      | -0.035 | 0.447  | 0.227 | 38.2   | 0.0            | ?       |
| 4      | 0.035  | 0.553  | 0.773 | 38.2   | 0.0            | ?       |
| 5      | 0.500  | 0.000  | 0.500 | 266.6  | 91.5           | ?       |
| 6      | 0.500  | 0.500  | 1.000 | 266.6  | 91.5           | ?       |

### Experimental

A suitable Single crystal of  $C_{26}H_{17}N_3OS$  [**4a**] crystal was selected on a Bruker APEX-IV CCD diffractometer. The crystal was kept at 100.00 K during data collection. Using Olex2 [1], the structure was solved with the ShelXT [2] structure solution program using Intrinsic Phasing and refined with the ShelXL [3] refinement package using LS minimization.

### References

1. Dolomanov, O.V., Bourhis, L.J., Gildea, R.J., Howard, J.A.K. & Puschmann, H. (2009), *J. Appl. Cryst.* 42, 339-341.
2. Sheldrick, G. M. (2015). *Acta Cryst.* A71, 3–8
3. Sheldrick, G. M. (2008). *Acta Cryst.* A64, 112–122.
